# Supplementary material for: Persulfate promoted regioselective C-1 thiocyanation of imidazo[1,5-a]pyridines under visible light irradiation in water
Source: Royal Society of Chemistry journal article supplement (doi:10.1039/d4nj00327f), 2024-01-01

## Persulfate promoted C-1 thiocyanation of imidazo[1,5-*a*]pyridines under visible light irradiation in water

Pallavi Saha,<sup>a</sup> Samarpita Das,<sup>a</sup> Harish K. Indurthi,<sup>a</sup> Rohit Kumar,<sup>a</sup> and Deepak K Sharma<sup>\*a</sup>

<sup>a</sup>Department of Pharmaceutical Engg. and Tech., IIT-Banaras Hindu University, Varanasi, UP, 221005, email id: [deepak.phe@itbhu.ac.in](mailto:deepak.phe@itbhu.ac.in)

### Table of Contents

|    |                                                                                                                        |         |
|----|------------------------------------------------------------------------------------------------------------------------|---------|
| 1. | General Information.....                                                                                               | S2      |
| 2. | General Synthetic Procedure for Compounds <b>2a-2r</b> and <b>3aa-3ca</b> .....                                        | S3      |
| 3. | Spectral Data.....                                                                                                     | S4-S11  |
| 4. | Gram Scale Synthesis of <b>2a</b> .....                                                                                | S12     |
| 5. | Conversion of thiocyanate to thioether ( <b>2ca</b> ) and thiocarbamate ( <b>2ea</b> )<br>and their spectral data..... | S13-S14 |
| 6. | Control Experiment .....                                                                                               | S15-S17 |
| 7. | <sup>1</sup> H and <sup>13</sup> C NMR Spectra.....                                                                    | S18-S67 |

## General information

All chemicals were purchased from Sigma-Aldrich, TCI Chemicals, SRL Chemicals, and Avra, and used as received. Molychem silica gel (60-120 mesh) was used for column chromatography, and thin-layer chromatography was performed on Merck pre-coated silica gel 60-F254 plates. All other chemicals and solvents were obtained from commercial sources and purified using standard methods. The  $^1\text{H}$  NMR and  $^{13}\text{C}$  NMR spectra were recorded on Bruker Advance spectrometers. Data are represented as follows: chemical shift, integration, multiplicity (br = broad, s = singlet, d = doublet, dd = double doublet, t = triplet, q = quartet, dd= doublet of doublet, dt= doublet of triplet, td= triplet of doublet and m = multiplet), and coupling constants in hertz (Hz).

**General procedure for the synthesis of 2a-2r:**

An oven-dried round bottom flask was charged with the corresponding 3-aryl/heteroaryl/alkyl substituted imidazo[1,5-*a*]pyridine (1 mmol), KSCN (2 equiv.), K<sub>2</sub>S<sub>2</sub>O<sub>8</sub> (1 equiv.) in 2 mL of H<sub>2</sub>O. The reaction mixture was stirred at room temperature for 6 h under irradiation of blue LED light (24 W, 455 nm), at a distance of 10-12cm away from light source, in open air. After completion of reaction, the reaction mixture was extracted with ethyl acetate (15 mL × 3). The combined organic layers were washed with brine, dried over Na<sub>2</sub>SO<sub>4</sub>, and concentrated in vacuum. The residue was purified by column chromatography on silica gel using a solvent system of ethyl acetate/*n*-hexane to afford the desired product.

**General procedure for the synthesis of 3aa-3ca:**

An oven-dried round bottom flask was charged with the corresponding imidazoheterocycle (1 mmol), KSCN (2 equiv.), K<sub>2</sub>S<sub>2</sub>O<sub>8</sub> (1 equiv.) in 2 mL of H<sub>2</sub>O. The reaction mixture was stirred at room temperature for 6 h under irradiation of blue LED light (24 W, 455 nm), at a distance of 10-12 cm away from light source, in open air. After completion of reaction, the reaction mixture was extracted with ethyl acetate (15 mL × 3). The combined organic layers were washed with brine, dried over Na<sub>2</sub>SO<sub>4</sub>, and concentrated in vacuum. The residue was purified by column chromatography on silica gel using a solvent system of ethyl acetate/*n*-hexane to afford the desired product.

## Spectral Data

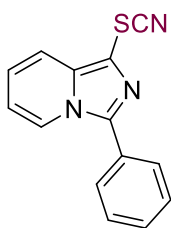

**3-Phenyl-1-thiocyanatoimidazo[1,5-*a*]pyridine (2a):**  $^1\text{H}$  NMR ( $\text{CDCl}_3$ , 600 MHz)  $\delta$  (ppm) 8.30 (d,  $J=7.2$  Hz, 1H), 7.75 (d,  $J=7.2$  Hz, 2H), 7.70 (d,  $J=9$  Hz, 1H), 7.55-7.52 (m, 2H), 7.50-7.47 (m, 1H), 7.09-7.06 (m, 1H), 6.77 (t,  $J=6.6$  Hz, 1H);  $^{13}\text{C}$  NMR ( $\text{CDCl}_3$ , 150 MHz)  $\delta$  (ppm) 140.2, 135.4, 129.8, 129.2, 128.7, 128.3, 123.4, 122.7, 114.5, 110.6, 108.0. HRMS (ESI-TOF)  $m/z$ :  $[\text{M} + \text{H}]^+$  Calcd. for  $\text{C}_{14}\text{H}_{10}\text{N}_3\text{S}$ : 252.0595; found: 252.0591.

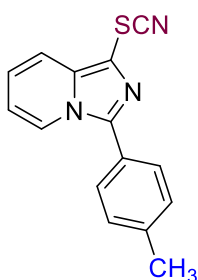

**1-Thiocyanato-3-(*p*-tolyl)imidazo[1,5-*a*]pyridine (2b):**  $^1\text{H}$  NMR ( $\text{CDCl}_3$ , 500 MHz)  $\delta$  (ppm) 8.46-8.45 (m, 1H), 7.98 (d,  $J=7.2$  Hz, 2H), 7.78 (d,  $J=9$  Hz, 1H), 7.49-7.46 (m, 1H), 7.34 (d,  $J=7.5$  Hz, 2H), 7.15-7.12 (m, 1H), 7.14-7.12 (m, 1H), 2.46 (s, 1H);  $^{13}\text{C}$  NMR ( $\text{CDCl}_3$ , 125 MHz)  $\delta$  (ppm) 153.2, 147.9, 139.6, 129.5, 129.1, 128.7, 128.0, 124.4, 118.2, 114.3, 108.2, 94.3, 21.4. HRMS (ESI-TOF)  $m/z$ :  $[\text{M} + \text{H}]^+$  Calcd. for  $\text{C}_{15}\text{H}_{12}\text{N}_3\text{S}$ : 266.0752; found: 266.0744.

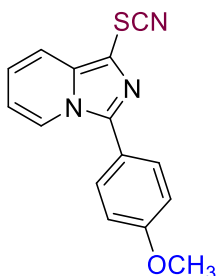

**3-(4-Methoxyphenyl)-1-thiocyanatoimidazo[1,5-*a*]pyridine (2c):**  $^1\text{H}$  NMR ( $\text{CDCl}_3$ , 600 MHz)  $\delta$  (ppm) 8.27 (d,  $J=7.2$  Hz, 1H), 7.73-7.70 (m, 2H), 7.09-7.08 (m, 3H), 6.777 (d,  $J=7.08$  Hz, 1H), 3.91 (s, 3H);  $^{13}\text{C}$  NMR ( $\text{CDCl}_3$ , 150 MHz)  $\delta$  (ppm) 160.7, 140.3, 135.2, 129.8, 123.1,



122.7, 121.1, 117.3, 114.6, 114.2, 110.6, 107.6, 55.5. HRMS (ESI-TOF)  $m/z$ :  $[M + H]^+$  Calcd. for  $C_{15}H_{12}ON_3S$ : 282.0701; found: 282.0696.

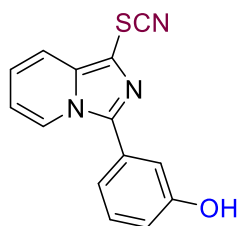

**4-(1-Thiocyanatoimidazo[1,5-*a*]pyridin-3-yl)phenol (2d)**:  $^1H$  NMR ( $CDCl_3$ , 600 MHz)  $\delta$  (ppm) 8.16 (d,  $J = 7.2$  Hz, 1H), 7.60 (d,  $J = 9.6$  Hz, 1H), 7.18-7.13 (m, 2H), 7.05 (d,  $J = 7.8$  Hz, 1H), 7.02-6.99 (m, 1H), 6.82-6.80 (M, 1H), 6.69-6.66 (M, 1H);  $^{13}C$  NMR ( $CDCl_3$ , 150 MHz)  $\delta$  (ppm) 157.5, 140.4, 135.3, 130.3, 128.8, 123.9, 123.1, 119.6, 117.8, 117.1, 116.0, 114.7, 110.4, 107.1. HRMS (ESI-TOF)  $m/z$ :  $[M + H]^+$  Calcd. for  $C_{14}H_{10}N_3OS$ : 268.3140; found: 268.3136.

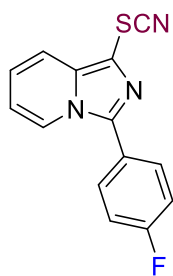

**3-(4-Fluorophenyl)-1-thiocyanatoimidazo[1,5-*a*]pyridine (2e)**:  $^1H$  NMR ( $CDCl_3$ , 500 MHz)  $\delta$  (ppm) 8.27 (d,  $J = 7.5$  Hz, 1H), 7.80-7.74 (m, 3H), 7.29-7.28 (m, 2H), 7.14-7.11 (m, 1H), 6.84-6.81 (m, 1H);  $^{13}C$  NMR ( $CDCl_3$ , 125 MHz)  $\delta$  (ppm) 163.4 (d,  $J_{F-C} = 250$  Hz), 139.3, 135.3, 130.4 (d,  $J_{F-C} = 8.75$  Hz), 124.9 4 (d,  $J_{F-C} = 3.75$  Hz), 123.3, 122.4, 117.4, 116.5 4 (d,  $J_{F-C} = 22.5$  Hz), 114.6, 110.4, 108.3;  $^{19}F$  NMR ( $CDCl_3$ , 471 MHz)  $\delta$  (ppm) -109.95 (m, 1F). HRMS (ESI-TOF)  $m/z$ :  $[M + H]^+$  Calcd. for  $C_{14}H_8FN_3S$ : 269.2974; found: 269.2972.

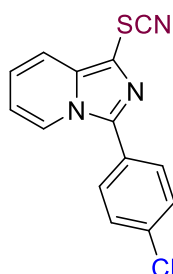

**3-(4-Chlorophenyl)-1-thiocyanatoimidazo[1,5-*a*]pyridine (2f)**:  $^1H$  NMR ( $CDCl_3$ , 600 MHz)  $\delta$  (ppm) 8.19 (d,  $J = 7.2$  Hz, 1H), 7.67-7.64 (m, 3H), 7.45 (d,  $J = 8.4$  Hz, 2H), 7.05-7.02 (m, 1H), 6.74 (t,  $J = 6.6$  Hz, 1H);  $^{13}C$  NMR ( $CDCl_3$ , 150 MHz)  $\delta$  (ppm) 139.1, 135.8, 135.5, 129.5,

127.2, 123.5, 122.5, 117.5, 114.8, 110.4, 108.6. HRMS (ESI-TOF)  $m/z$ :  $[M + H]^+$  Calcd. for  $C_{14}H_9ClN_3S$ : 286.0200; found, 286.0199.

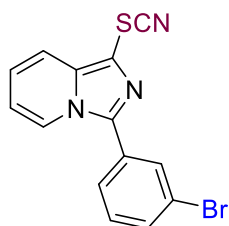

**3-(3-Bromophenyl)-1-thiocyanatoimidazo[1,5-*a*]pyridine (2g):**  $^1H$  NMR ( $CDCl_3$ , 600 MHz)  $\delta$  (ppm) 8.31 (d,  $J=7.2$  Hz, 1H), 7.94 (s, 1H), 7.75-7.71 (m, 2H), 7.63 (d,  $J=7.8$  Hz, 1H), 7.43 (t,  $J=7.8$  Hz, 1H), 7.14-7.11 (m, 1H), 6.84 (t,  $J=6.6$  Hz, 1H);  $^{13}C$  NMR ( $CDCl_3$ , 150 MHz)  $\delta$  (ppm) 138.5, 135.5, 132.8, 131.2, 130.7, 130.6, 126.7, 123.6, 123.3, 122.5, 117.5, 114.9, 110.3, 108.8. HRMS (ESI-TOF)  $m/z$ :  $[M + H]^+$  Calcd. for  $C_{14}H_9BrN_3S$ : 329.9701; found: 329.9692.

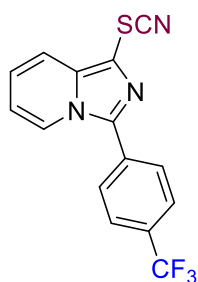

**1-Thiocyanato-3-(4-(trifluoromethyl)phenyl)imidazo[1,5-*a*]pyridine (2h):**  $^1H$  NMR ( $CDCl_3$ , 600 MHz)  $\delta$  (ppm) 8.27 (d,  $J=6.6$  Hz, 1H), 7.87 (d,  $J=7.8$  Hz, 2H), 7.75 (d,  $J=8.4$  Hz, 2H), 7.71 (d,  $J=9.6$  Hz, 1H), 7.10-7.07 (m, 1H), 6.79-6.75 (t,  $J=7.2$  Hz, 1H),  $^{13}C$  NMR ( $CDCl_3$ , 150 MHz)  $\delta$  (ppm) 138.6, 135.7, 132.3, 131.6, 131.4, 128.5, 126.2 (q,  $J_{F-C}=4.5$  Hz), 123.7, 122.4, 117.6, 115.1, 110.2, 109.3.  $^{19}F$  NMR ( $CDCl_3$ , 471 MHz)  $\delta$  = -61.339 (s, 1F). HRMS (ESI-TOF)  $m/z$ :  $[M + H]^+$  Calcd. for  $C_{15}H_9F_3N_3S$ : 320.3032; found: 335.3015.

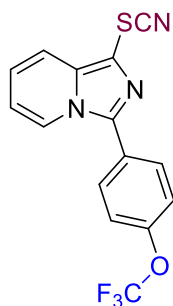

**1-thiocyanato-3-(4-(trifluoromethoxy)phenyl)imidazo[1,5-*a*]pyridine (2i):**  $^1\text{H}$  NMR ( $\text{CDCl}_3$ , 600 MHz)  $\delta$  (ppm) 8.29 (d,  $J=7.2$  Hz, 1H), 7.83 (d,  $J=9$  Hz, 2H), 7.75 (d,  $J=9$  Hz, 1H), 7.41 (d,  $J=8.4$  Hz, 1H), 7.14-7.11 (m, 1H), 6.83 (t,  $J=6.6$  Hz, 1H);  $^{13}\text{C}$  NMR ( $\text{CDCl}_3$ , 150 MHz)  $\delta$  (ppm) 150.0, 138.8, 135.5, 129.9, 127.4, 123.5, 122.4, 121.6, 120.4 (d,  $J_{\text{F-C}}=256.5$  Hz), 117.5, 114.8, 110.3, 108.6;  $^{19}\text{F}$  NMR ( $\text{CDCl}_3$ , 471 MHz)  $\delta=-57.72$  (s, 3F). HRMS (ESI-TOF)  $m/z$ :  $[\text{M} + \text{H}]^+$  Calcd. for  $\text{C}_{15}\text{H}_9\text{F}_3\text{N}_3\text{OS}$ : 335.3042; found: 335.3038.

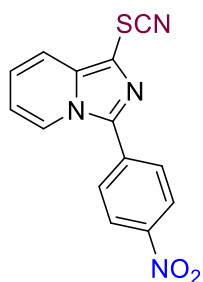

**3-(4-Nitrophenyl)-1-thiocyanatoimidazo[1,5-*a*]pyridine (2j):**  $^1\text{H}$  NMR ( $\text{CDCl}_3$ , 600 MHz)  $\delta$  (ppm) 8.45-8.42 (m, 3H), 8.07-8.05 (m, 2H), 7.84 (d,  $J=9.6$  Hz, 1H), 7.25-7.22 (m, 1H), 6.98-6.95 (m, 1H);  $^{13}\text{C}$  NMR ( $\text{CDCl}_3$ , 150 MHz,)  $\delta$  (ppm) 147.9, 137.7, 136.0, 134.8, 128.7, 124.5, 124.1, 122.4, 117.8, 115.6, 110.3, 109.9. HRMS (ESI-TOF)  $m/z$ :  $[\text{M} + \text{H}]^+$  Calcd. for  $\text{C}_{14}\text{H}_9\text{N}_4\text{O}_2\text{S}$ : 297.0446; found 297.0418.

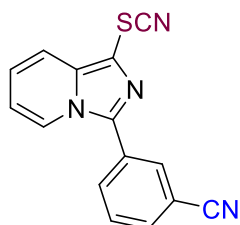

**3-(1-Thiocyanatoimidazo[1,5-*a*]pyridin-3-yl)benzotrile (2k):**  $^1\text{H}$  NMR ( $\text{CDCl}_3$ , 500 MHz)  $\delta$  (ppm) 8.33 (dt,  $J=7$  Hz, 1Hz, 1H), 8.12-8.11 (m, 1H), 8.09-8.07 (m, 1H), 7.81-7.79 (m, 1H), 7.71 (td,  $J=7$  Hz, 1 Hz, 1H), 7.21-7.18 (m, 1H), 6.94-6.91 (m, 1H);  $^{13}\text{C}$  NMR ( $\text{CDCl}_3$ , 125 MHz,)  $\delta$  (ppm) 137.6, 135.8, 132.9, 132.3, 131.4, 130.2, 123.9, 122.2, 117.9, 117.6, 115.4, 113.7, 110.1, 109.4. HRMS (ESI-TOF)  $m/z$ :  $[\text{M} + \text{H}]^+$  Calcd. for  $\text{C}_{15}\text{H}_9\text{N}_4\text{S}$ : 277.0548; found: 277.0547.

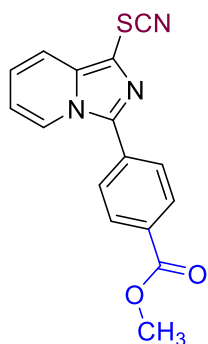

**Methyl 4-(1-thiocyanatoimidazo[1,5-*a*]pyridin-3-yl)benzoate (2l):**  $^1\text{H}$  NMR (DMSO- $d_6$ , 600 MHz)  $\delta$  (ppm) 8.71 (d,  $J=7.2$  Hz, 1H), 8.16-8.14 (m, 2H), 8.07-8.06 (m, 2H), 7.87 (d,  $J=9$  Hz, 1H), 7.34-7.31 (m, 1H), 7.06-7.04 (m, 1H), 3.92 (s, 3H); (d,  $J=7.8$  Hz, 1H);  $^{13}\text{C}$  NMR (DMSO- $d_6$ , 150 MHz,)  $\delta$  (ppm) 166.2, 143.0, 141.0, 138.7, 135.8, 133.4, 130.3, 128.6, 125.2, 124.5, 117.2, 115.8, 111.8, 52.8. HRMS (ESI-TOF)  $m/z$ :  $[\text{M} + \text{H}]^+$  Calcd. for  $\text{C}_{16}\text{H}_{11}\text{N}_3\text{O}_3\text{S}$ : 309.0572; found 309.0565.

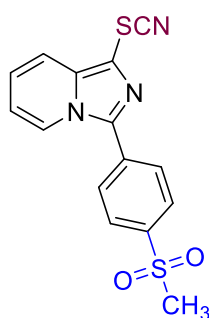

**3-(4-(Methylsulfonyl)phenyl)-1-thiocyanatoimidazo[1,5-*a*]pyridine (2m):**  $^1\text{H}$  NMR ( $\text{CDCl}_3$ , 600 MHz)  $\delta$  (ppm) 8.31 (d,  $J=7.2$  Hz, 1H), 8.06 (d,  $J=8.4$  Hz, 2H), 7.96 (d,  $J=8.4$  Hz, 1H), 7.73 (d,  $J=9$  Hz, 1H), 7.13-7.10 (m, 1H), 6.85-6.83 (m, 1H);  $^{13}\text{C}$  NMR ( $\text{CDCl}_3$ , 150 MHz,)  $\delta$  (ppm) 141.2, 138.0, 135.9, 134.0, 128.8, 128.4, 124.0, 122.4, 117.7, 115.5, 110.0, 109.9, 44.5. HRMS (ESI-TOF)  $m/z$ :  $[\text{M} + \text{H}]^+$  Calcd. for  $\text{C}_{15}\text{H}_{12}\text{N}_3\text{O}_2\text{S}_2$ : 330.4000; found 309.3996.

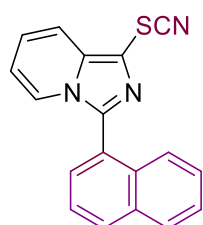

**3-(Naphthalen-1-yl)-1-thiocyanatoimidazo[1,5-*a*]pyridine (2n):**  $^1\text{H}$  NMR ( $\text{CDCl}_3$ , 600 MHz)  $\delta$  (ppm) 8.01 (d,  $J=7.8$  Hz, 1H), 7.94 (d,  $J=7.8$  Hz, 1H), 7.75 (d,  $J=9$  Hz, 1H), 7.71 (t,

$J= 8.4$  Hz, 2H), 7.63-7.58 (m, 2H), 7.53 (t,  $J= 7.2$  Hz, 1H), 7.47 (t,  $J= 7.2$  Hz, 2H); (d,  $J= 7.8$  Hz, 1H);  $^{13}\text{C}$  NMR ( $\text{CDCl}_3$ , 150 MHz,)  $\delta$  (ppm) 139.0, 135.1, 133.9, 131.5, 130.8, 129.0, 128.8, 127.5, 126.7, 125.6, 125.3, 125.0, 123.5, 123.3, 117.1, 114.2, 110.7, 107.7. HRMS (ESI-TOF)  $m/z$ :  $[\text{M} + \text{H}]^+$  Calcd. for  $\text{C}_{13}\text{H}_{12}\text{N}_3\text{S}$ : 302.0752; found: 302.0747.

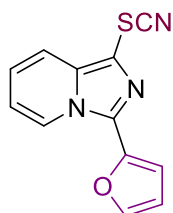

**3-(Furan-2-yl)-1-thiocyanatoimidazo[1,5-*a*]pyridine (2o):**  $^1\text{H}$  NMR ( $\text{CDCl}_3$ , 600 MHz)  $\delta$  (ppm) 8.77 (d,  $J= 7.2$  Hz, 1H), 7.70 (d,  $J= 9$  Hz, 1H), 7.61 (d,  $J= 1.2$  Hz, 1H), 7.12-7.09 (m, 2H), 6.87 (t,  $J= 6.6$  Hz, 1H), 6.6 (m, 1H);  $^{13}\text{C}$  NMR ( $\text{CDCl}_3$ , 150 MHz,)  $\delta$  (ppm) 145.0, 142.9, 134.8, 132.2, 124.3, 123.5, 117.1, 114.9, 112.0, 110.2, 108.5. HRMS (ESI-TOF)  $m/z$ :  $[\text{M} + \text{H}]^+$  Calcd. for  $\text{C}_{12}\text{H}_8\text{N}_3\text{OS}$ : 242.2762; found: 242.2753.

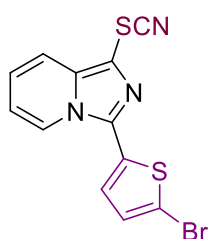

**3-(5-Bromothiophen-2-yl)-1-thiocyanatoimidazo[1,5-*a*]pyridine (2p):**  $^1\text{H}$  NMR ( $\text{CDCl}_3$ , 600 MHz)  $\delta$  (ppm) 8.35 (d,  $J= 7.2$  Hz, 1H), 7.75 (d,  $J= 9.6$  Hz, 1H), 7.3 (d,  $J= 4.2$  Hz, 1H), 7.16 (d,  $J= 4.2$  Hz, 1H), 7.15-7.12 (m, 1H), 6.90 (t,  $J= 7.2$  Hz, 1H);  $^{13}\text{C}$  NMR ( $\text{CDCl}_3$ , 150 MHz)  $\delta$  (ppm) 135.4, 133.7, 132.0, 130.7, 126.6, 123.5, 117.6, 115.3, 114.9, 110.1, 109.0. HRMS (ESI-TOF)  $m/z$ :  $[\text{M} + \text{H}]^+$  Calcd. for  $\text{C}_{12}\text{H}_6\text{BrN}_3\text{OS}$ : 336.2250; found: 242.2245.

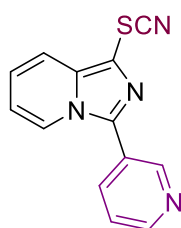

**3-(Pyridin-3-yl)-1-thiocyanatoimidazo[1,5-*a*]pyridine (2q):**  $^1\text{H}$  NMR ( $\text{CDCl}_3$ , 500 MHz)  $\delta$  (ppm) 9.07 (s, 1H), 8.76 (d,  $J= 4$  Hz, 1H), 8.33 (d,  $J= 7$  Hz, 1H), 8.15 (dt,  $J= 8$  Hz, 2 Hz, 1H), 7.79 (d,  $J= 9.5$  Hz, 1H), 7.54-7.52 (m, 1H), 7.19-7.16 (m, 1H), 6.90-6.88 (m, 1H);  $^{13}\text{C}$  NMR ( $\text{CDCl}_3$ , 125 MHz)  $\delta$  (ppm) 150.6, 148.7, 137.2, 136.0, 135.7, 125.3, 124.1, 123.8, 122.2, 117.6,

115.2, 110.2, 109.3. HRMS (ESI-TOF)  $m/z$ :  $[M + H]^+$  Calcd. for  $C_{13}H_8N_4S$ : 252.2950; found: 252.2947.

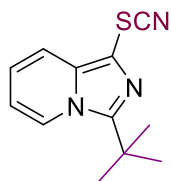

**3-(*Tert*-butyl)-1-thiocyanatoimidazo[1,5-*a*]pyridine (2r):**  $^1H$  NMR ( $CDCl_3$ , 500 MHz)  $\delta$  (ppm) 8.18 (d,  $J = 7.5$  Hz, 1H), 7.67 (d,  $J = 9$  Hz, 1H), 7.04-7.01 (m, 1H), 6.76-6.73 (m, 1H), 1.57 (s, 9H);  $^{13}C$  NMR ( $CDCl_3$ , 125 MHz)  $\delta$  (ppm) 147.5, 135.9, 124.2, 122.0, 111.0, 105.0, 33.8, 28.0. HRMS (ESI-TOF)  $m/z$ :  $[M + H]^+$  Calcd. for  $C_{12}H_{13}N_3S$ : 231.3170; found: 231.3168.

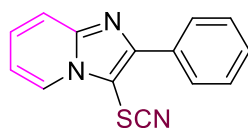

**2-Phenyl-3-thiocyanatoimidazo[1,2-*a*]pyridine (3aa):**  $^1H$  NMR ( $CDCl_3$ , 500 MHz)  $\delta$  (ppm) 8.47 (dt,  $J = 6.5$  Hz, 1Hz, 1H), 8.09-8.07 (m, 2H), 7.79 (d,  $J = 9$  Hz, 1H), 7.57-7.54 (m, 2H), 7.51-7.47 (m, 2H), 7.15 (td,  $J = 6.5$  Hz, 1Hz, 1H);  $^{13}C$  NMR ( $CDCl_3$ , 125 MHz)  $\delta$  (ppm) 153.1, 148.0, 132.0, 129.5, 128.8, 128.7, 128.0, 124.4, 118.3, 114.4, 108.1, 94.7. HRMS (ESI-TOF)  $m/z$ :  $[M + H]^+$  Calcd. for  $C_{14}H_{10}N_3S$ : 252.0595; found: 252.0591.

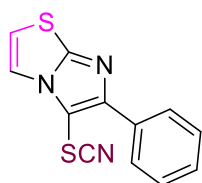

**6-Phenyl-5-thiocyanatoimidazo[2,1-*b*]thiazole (3ba):**  $^1H$  NMR ( $DMSO-d_6$ , 600 MHz)  $\delta$  (ppm) 8.23 (d,  $J = 4$  Hz, 1H), 8.00-7.98 (m, 2H), 7.58 (d,  $J = 4.5$  Hz, 1H), 7.57-7.53 (m, 2H), 7.48-7.45 (m, 1H);  $^{13}C$  NMR ( $CDCl_3$ , 125 MHz)  $\delta$  (ppm) 152.7, 152.2, 132.8, 129.3, 128.1, 127.9, 119.7, 116.6, 111.1, 90.1. HRMS (ESI-TOF)  $m/z$ :  $[M + H]^+$  Calcd. for  $C_{12}H_7N_3S_2$ : 257.3290; found: 257.3286.

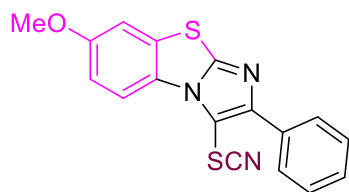

**7-Methoxy-2-phenyl-3-thiocyanatobenzo[*d*]imidazo[2,1-*b*]thiazole (3ca):**  $^1\text{H}$  NMR ( $\text{CDCl}_3$ , 500 MHz)  $\delta$  (ppm) 8.39 (d,  $J = 9$  Hz, 1H), 8.00-7.99 (m, 2H), 7.56-7.53 (m, 2H), 7.49-7.46 (m, 1H), 7.30 (d,  $J = 2.5$  Hz, 1H), 7.16 (dd,  $J = 9$  Hz, 2.5 Hz, 1H), 3.93 (s, 3H);  $^{13}\text{C}$  NMR ( $\text{CDCl}_3$ , 125 MHz)  $\delta$  (ppm) 157.8, 155.0, 131.9, 131.8, 129.2, 128.7, 128.3, 127.0, 114.5, 114.2, 108.9, 108.8, 97.7. HRMS (ESI-TOF)  $m/z$ :  $[\text{M} + \text{H}]^+$  Calcd. for  $\text{C}_{17}\text{H}_{12}\text{N}_3\text{OS}_2$ : 337.0344; found: 337.0341.

## Gram Scale Synthesis

An oven-dried round bottom flask was charged with the 3-phenyl imidazo[1,5-*a*]pyridine (7.0 mmol, 1.35 gm), KSCN (2 equiv.), K<sub>2</sub>S<sub>2</sub>O<sub>8</sub> (1 equiv.) in 10 mL of H<sub>2</sub>O. The reaction mixture was stirred at room temperature for 9 h under irradiation of blue LED light (24 W, 455 nm) in open air. The reaction mixture was kept at a distance of 2 cm from the light source for irradiation. After completion of reaction, the reaction mixture was extracted with ethyl acetate (15 mL × 3). The combined organic layers were washed with brine, dried over Na<sub>2</sub>SO<sub>4</sub>, and concentrated in vacuum. The residue was purified by column chromatography on silica gel to afford the desired product **2a** in 89% yield (Scheme 1).

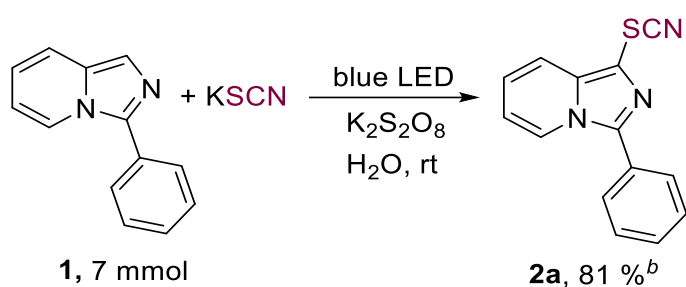

**Scheme 1:** Gram-scale reaction.

**Reaction conditions:** **1** (7 mmol), KSCN (2 equiv.), K<sub>2</sub>S<sub>2</sub>O<sub>8</sub> (1 equiv.), H<sub>2</sub>O (10 mL), 9 h, rt, open air, blue LED (24 W, 455 nm). <sup>b</sup>Isolated yield.



## Conversion of thiocyanated imidazo[1,5-*a*]pyridines to thioether and thiocarbamate:

### General procedure for the synthesis of **2ca**:

To an oven-dried round bottom flask **2c** (1 equiv., 0.2 mmol) was added in 2 mL of water. Iodobenzene (1 equiv.), CuCl<sub>2</sub>•2H<sub>2</sub>O (0.1 equiv.), 1,10-Phenanthroline (0.1 equiv.), Cs<sub>2</sub>CO<sub>3</sub> (2 equiv.), (nBu)<sub>4</sub>NF (0.2 equiv.) was further added and the entire reaction mixture was subjected to uniform stirring at 100°C for 12 h. After completion of reaction, the reaction mixture was extracted with ethyl acetate (15 mL × 3). The combined organic layers were washed with brine, dried over Na<sub>2</sub>SO<sub>4</sub>, and concentrated in vacuum. The residue was purified by column chromatography on silica gel using a solvent system of ethyl acetate/*n*-hexane to afford the desired product.

### General procedure for the synthesis of **2ea**:

To an oven-dried round bottom flask, **2e** (1 equiv., 0.2 mmol) was added in 2 mL of DCM. To it 0.1 mL of H<sub>2</sub>SO<sub>4</sub> (18 M) was added and the entire reaction mixture was subjected to uniform stirring for 4 h in ice bath. On completion of the reaction, 10 mL of DCM was added to it for further dilution and the entire reaction mixture was washed with saturated aqueous NaHCO<sub>3</sub> solution (5 mL × 3), brine (5 mL × 2), dried over Na<sub>2</sub>SO<sub>4</sub>, and concentrated in vacuum. The residue was purified by column chromatography on silica gel using a solvent system of ethyl acetate/*n*-hexane to afford the desired product.

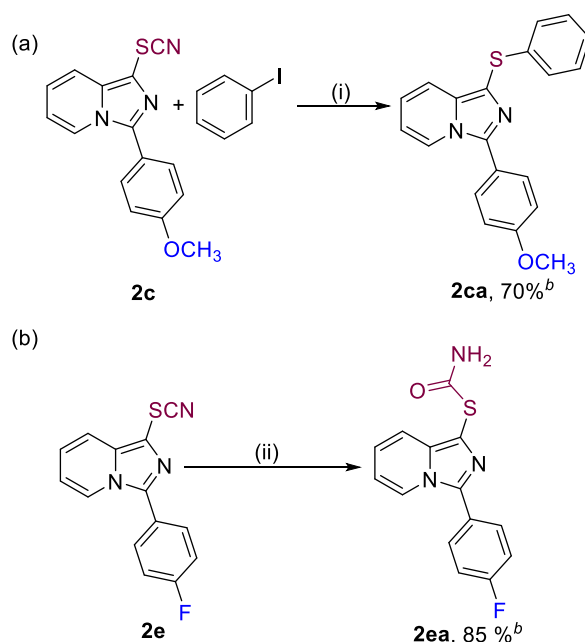

**Scheme 2:** Application of C-1 thiocyanated of imidazo[1,5-*a*]pyridines. "Reaction conditions: (i) **2c** (1 equiv.), Iodobenzene (1 equiv.), CuCl<sub>2</sub>•2H<sub>2</sub>O (0.1 equiv.), 1,10-Phenanthroline (0.1 equiv.), Cs<sub>2</sub>CO<sub>3</sub> (2 equiv.), (nBu)<sub>4</sub>NF (0.2 equiv.), H<sub>2</sub>O (5 mL). (ii) **2e** (1 equiv., 0.2 mmol), H<sub>2</sub>SO<sub>4</sub> (0.1 mL, 18 M), CH<sub>2</sub>Cl<sub>2</sub> (2 mL), 0°C, 4h. <sup>b</sup>Isolated yield.

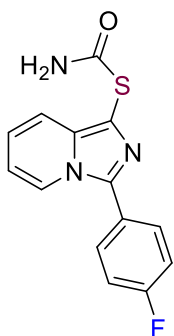

**S-(3-(4-fluorophenyl)imidazo[1,5-a]pyridin-1-yl) carbamothioate (2ea):**  $^1\text{H}$  NMR ( $\text{CDCl}_3$ , 600 MHz)  $\delta$  (ppm) 8.06 (d,  $J=4$  Hz, 1H), 7.70-7.68 (m, 2H), 7.14 (t,  $J=9$  Hz, 3H), 6.60-6.58 (m, 1H), 6.51 (t,  $J=6.6$  Hz, 1H);  $^{13}\text{C}$  NMR ( $\text{CDCl}_3$ , 150 MHz)  $\delta$  (ppm) 163.1(d,  $J_{F-C}=248.5$  Hz), 138.4, 135.9, 130.2 (d,  $J_{F-C}=7.5$  Hz), 125.7 (d,  $J_{F-C}=3$  Hz), 124.1, 121.8, 121.3, 118.6, 116.2 (d,  $J_{F-C}=21$  Hz), 113.9;  $^{19}\text{F}$  NMR ( $\text{CDCl}_3$ , 471 MHz)  $\delta$  (ppm) -107.870 (m, 1F). HRMS (ESI-TOF)  $m/z$ :  $[\text{M} + \text{H}]^+$  Calcd. for  $\text{C}_{14}\text{H}_{11}\text{FN}_3\text{OS}$ : 288.3204; found: 288.3200.

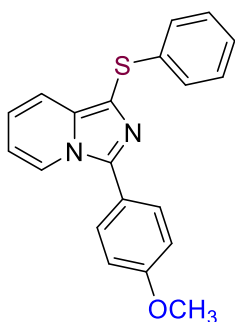

**3-(4-Methoxyphenyl)-1-(phenylthio)imidazo[1,5-a]pyridine (2ca):**  $^1\text{H}$  NMR ( $\text{CDCl}_3$ , 600 MHz)  $\delta$  (ppm) 8.17 (d,  $J=7.2$  Hz, 1H), 7.68 (d,  $J=8.4$  Hz, 1H), 7.55 (d,  $J=9$  Hz, 1H), 7.14-7.09 (m, 4H), 7.02-6.97 (m, 3H), 6.78-6.75 (m, 1H), 6.57 (t,  $J=7.2$  Hz, 1H), 3.80 (s, 3H);  $^{13}\text{C}$  NMR ( $\text{CDCl}_3$ , 150 MHz)  $\delta$  (ppm) 160.3, 139.3, 138.5, 134.9, 130.6, 129.7, 128.8, 127.0, 125.4, 122.0, 120.8, 119.5, 118.4, 114.4, 113.7, 55.4. HRMS (ESI-TOF)  $m/z$ :  $[\text{M} + \text{H}]^+$  Calcd. for  $\text{C}_{20}\text{H}_{16}\text{N}_2\text{OS}$ : 332.4210; found: 332.4208.

## Control Experiments

### TEMPO addition in the general procedure:

An oven-dried round bottom flask was charged with the 3-phenylimidazo[1,5-*a*]pyridine (1 mmol), KSCN (2 equiv.), K<sub>2</sub>S<sub>2</sub>O<sub>8</sub> (1 equiv.), TEMPO (4 equiv.) in 2 mL of H<sub>2</sub>O. The reaction mixture was stirred at room temperature for 6 h under irradiation of blue LED light (24 W, 455 nm) at a distance of 2 cm away from light source, in open air (Scheme 2a).

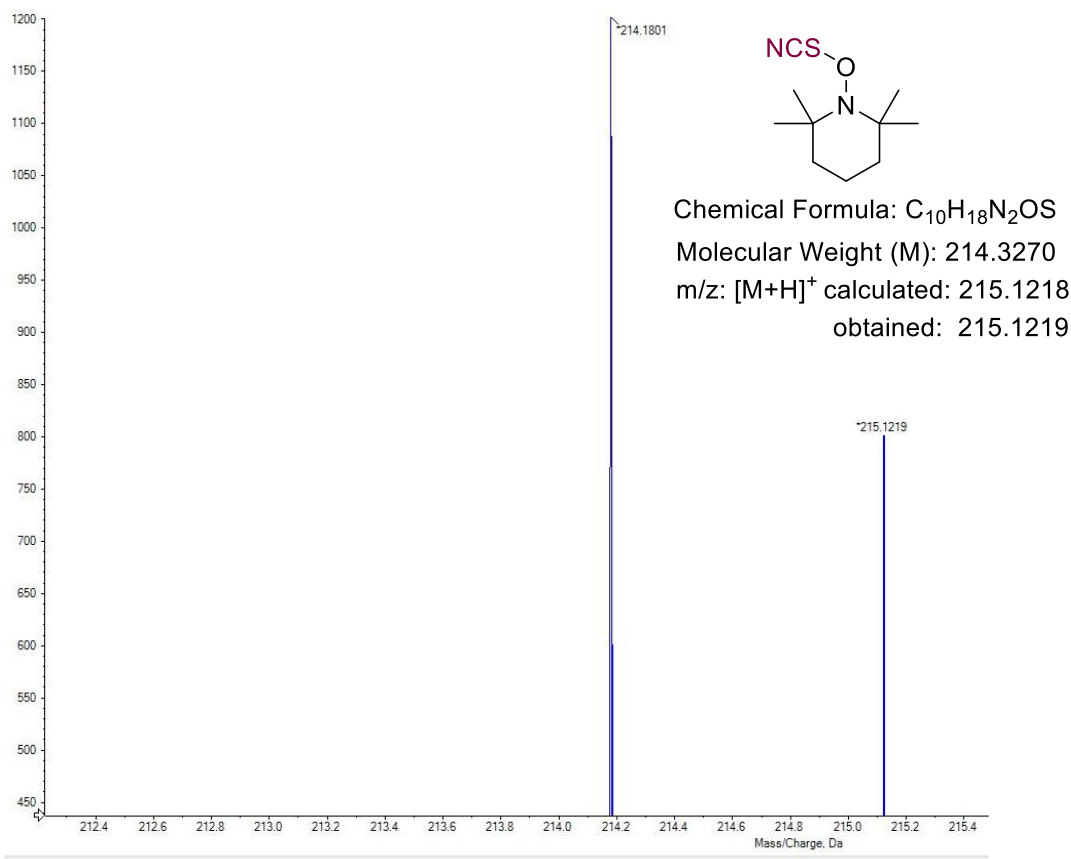

### BHT addition in the general procedure:

An oven-dried round bottom flask was charged with 3-phenylimidazo[1,5-*a*]pyridine (1 mmol), KSCN (2 equiv.), K<sub>2</sub>S<sub>2</sub>O<sub>8</sub> (1 equiv.), BHT (4 equiv.) in 2 mL of H<sub>2</sub>O. The reaction mixture was stirred at room temperature for 6 h under irradiation of blue LED light (24 W, 455 nm), at a distance of 2 cm away from light source, in open air (Scheme 2b).

### Reaction in darkness:

An oven-dried round bottom flask was charged with 3-phenylimidazo[1,5-*a*]pyridine (1 mmol), KSCN (2 equiv.), K<sub>2</sub>S<sub>2</sub>O<sub>8</sub> (1 equiv.), in 2 mL of H<sub>2</sub>O. The reaction mixture was stirred at room temperature for 3 h in open air and in absence of any light source *i.e.*, in darkness (Scheme 2c).

### Light on-off experiment:

Six standard oven-dried round bottom flask were charged with 3-phenyl imidazo[1,5-*a*]pyridine (1 mmol), KSCN (2 equiv.), K<sub>2</sub>S<sub>2</sub>O<sub>8</sub> (1 equiv.), in 2 mL of H<sub>2</sub>O. The mixtures were stirred uniformly under irradiated of blue LEDs (approximately 2 cm away from the light source) at room temperature. After 1hr LEDs were turned off, and one round bottom flask was removed from the irradiation setup for analysis. The remaining five reactions were stirred in the absence of light for another 1 hr. After 2 h, one reaction was removed for analysis, and the LED lamps were turned back on to irradiate the remaining four reaction mixtures. After an additional 1 h of irradiation, the blue LEDs were turned off, and one round bottom flask was removed for analysis. The remaining three reactions were stirred in the absence of light for an additional 1 h. After 4 h another reaction was removed for analysis, and the LEDs were turned back on to irradiate the remaining two reaction mixtures. After 5 h, the LEDs were turned off, and one round bottom flask was removed for analysis. The remaining one reaction was stirred in the absence of light for an additional 1 h, then, it was analyzed. The yield of each reaction was determined by column chromatography at the respective time intervals (Fig. 1).

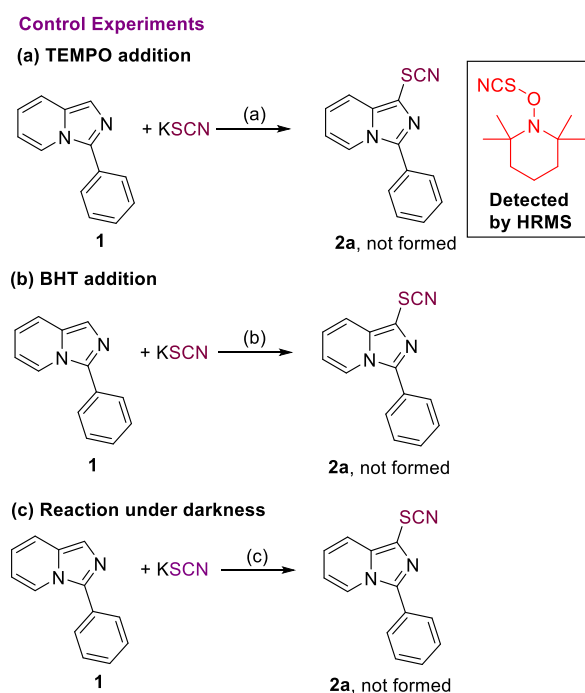

**Scheme 3:** Control Experiments Scheme.

**Reaction conditions:** (a) **1** (1 mmol), KSCN (2 equiv.), K<sub>2</sub>S<sub>2</sub>O<sub>8</sub> (1 equiv.), TEMPO (4 equiv.), blue LED (24 W, 455 nm), H<sub>2</sub>O (2 mL), 6 h, rt, open air; (b) **1** (1 mmol), KSCN (2 equiv.), K<sub>2</sub>S<sub>2</sub>O<sub>8</sub> (1 equiv.), BHT (4 equiv.), blue LED (24 W, 455 nm), H<sub>2</sub>O (2 mL), 6 h, rt, open air; (c) **1** (1 mmol), KSCN (2 equiv.), K<sub>2</sub>S<sub>2</sub>O<sub>8</sub> (1 equiv.), H<sub>2</sub>O (2 mL), 6 h, rt, open air.

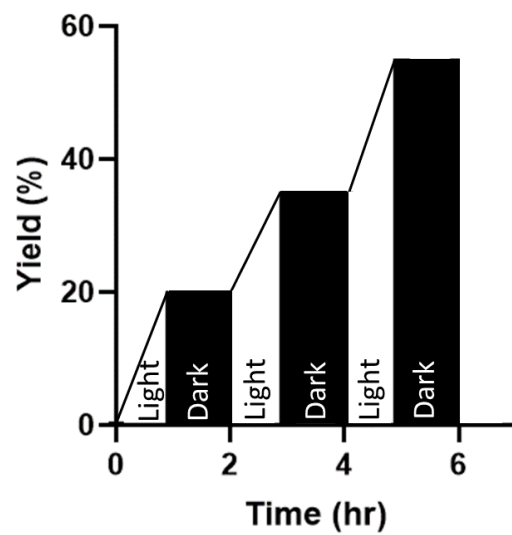

**Figure 1:** Light on-off experiment.

8.307  
8.295  
7.754  
7.742  
7.710  
7.695  
7.534  
7.522  
7.485  
7.076  
7.072  
6.783  
6.772  
6.761

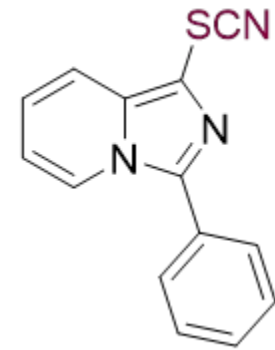

**2a**

<sup>1</sup>H NMR (CDCl<sub>3</sub>, 600 MHz)

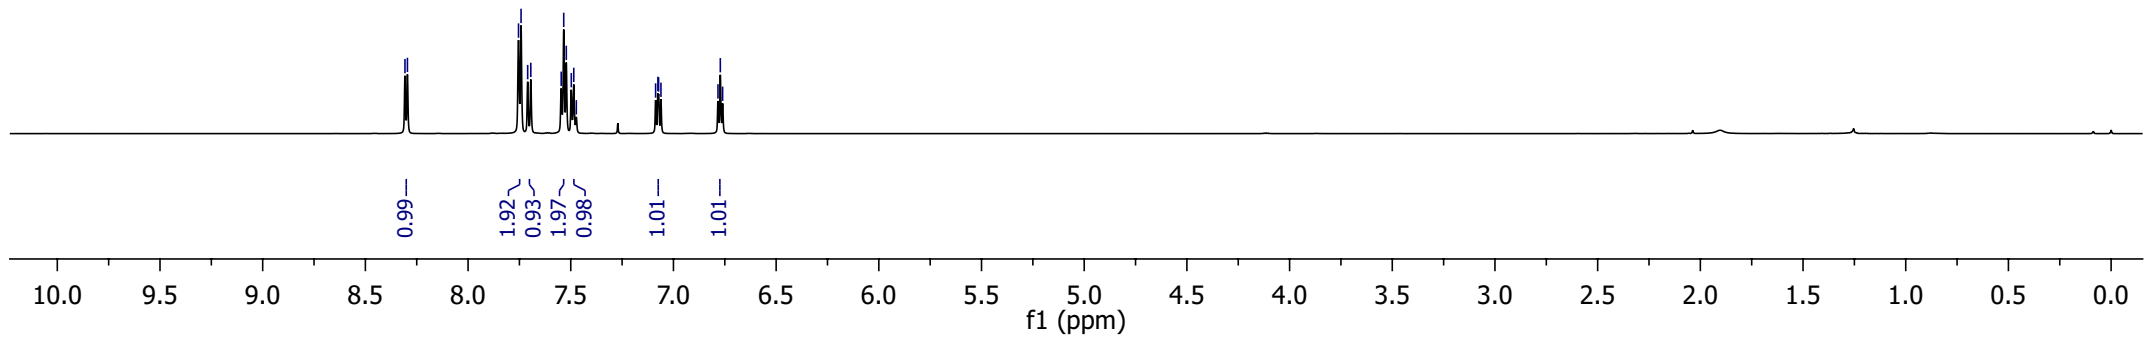

—140.23  
—135.38  
└─129.78  
└─129.22  
└─128.71  
└─128.30  
└─123.37  
└─122.69  
└─117.29  
└─114.48  
└─110.56  
└─108.02

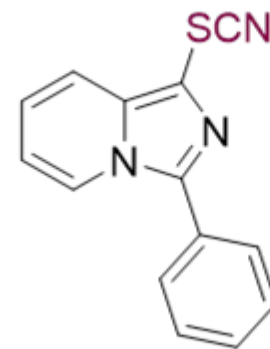

**2a**

<sup>13</sup>C NMR (CDCl<sub>3</sub>, 150 MHz)

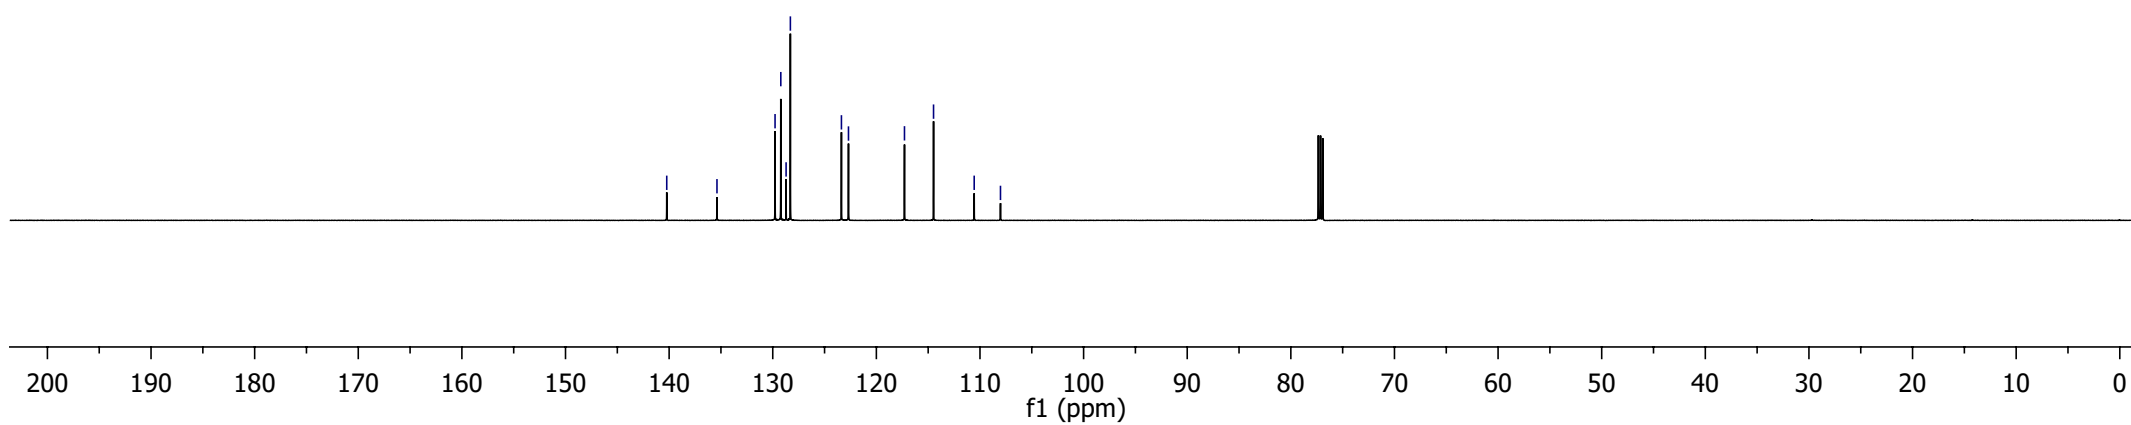

8.461  
8.459  
8.447  
8.446  
7.989  
7.973  
7.789  
7.771  
7.491  
7.477  
7.475  
7.473  
7.461  
7.459  
7.367  
7.352  
7.145  
7.131  
7.118

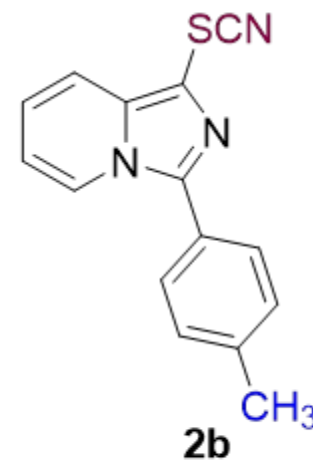

$^1\text{H}$  NMR ( $\text{CDCl}_3$ , 600 MHz)

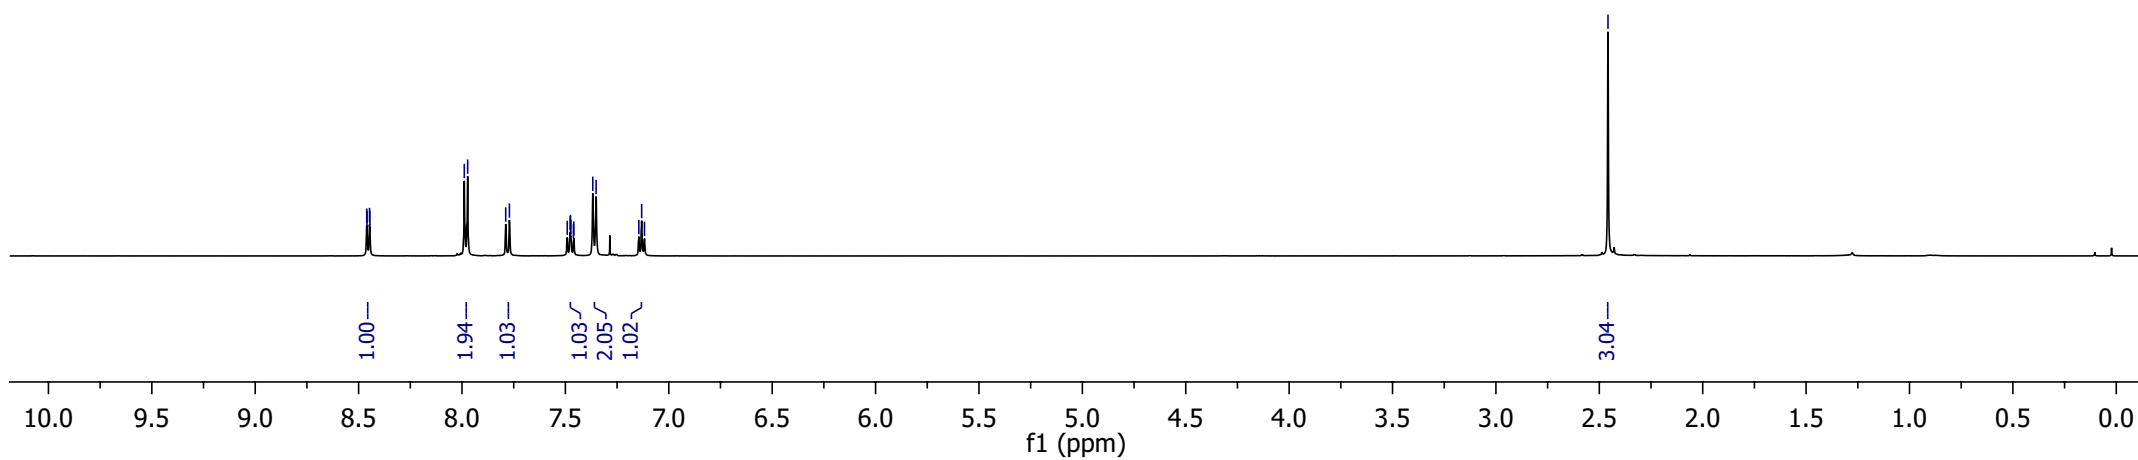



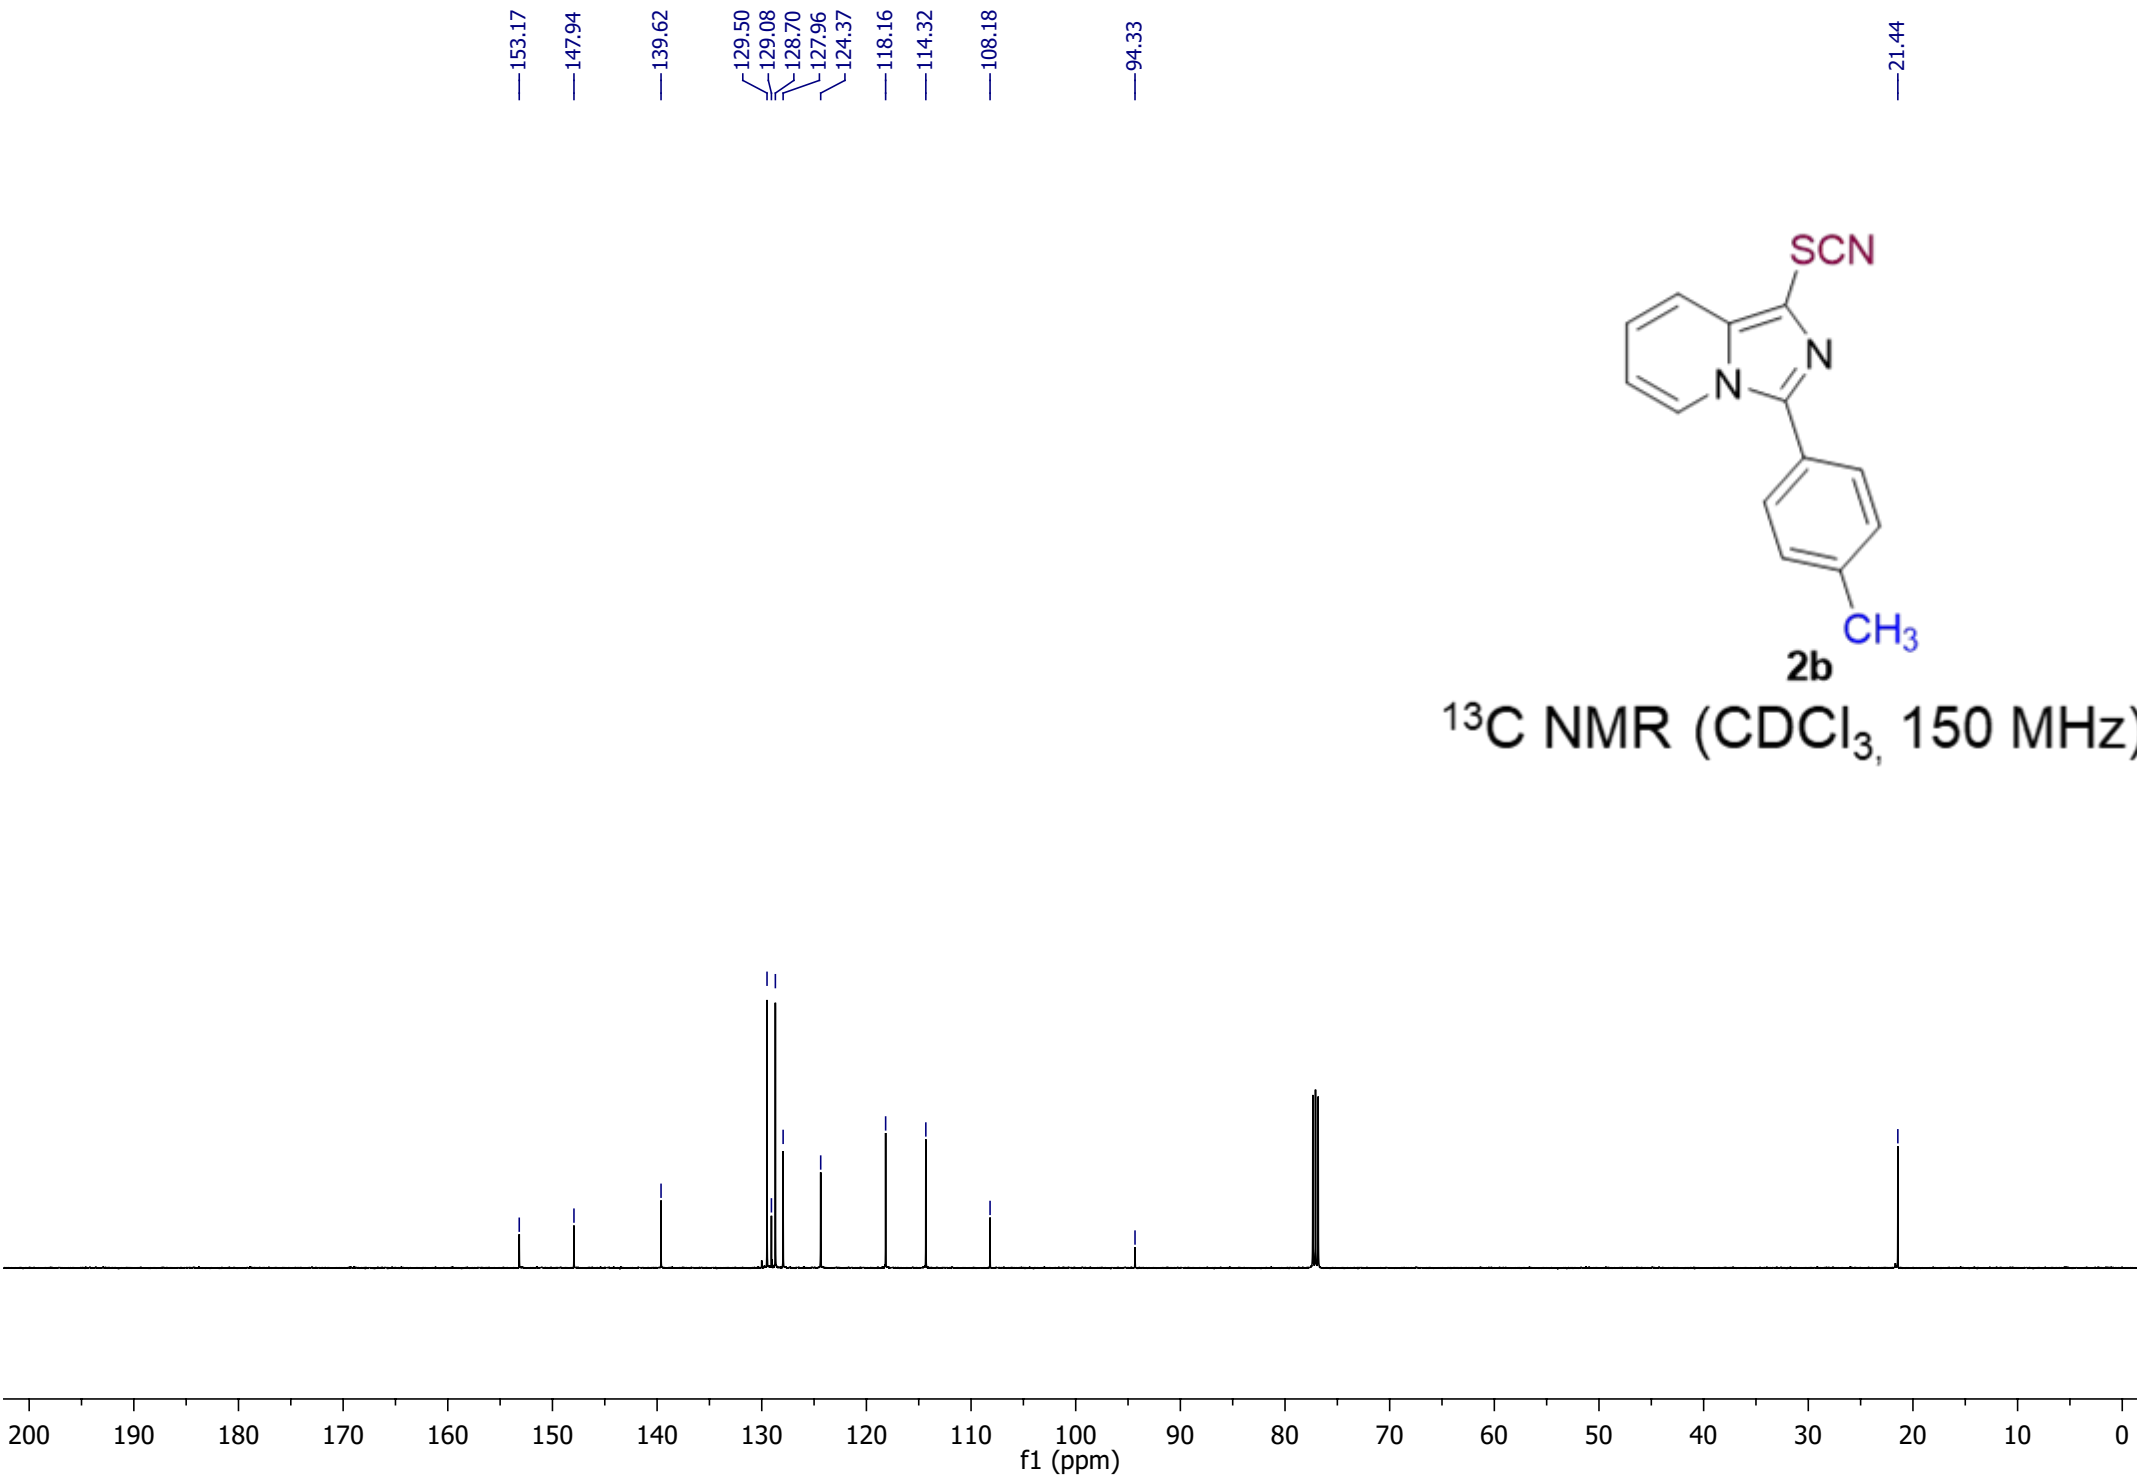

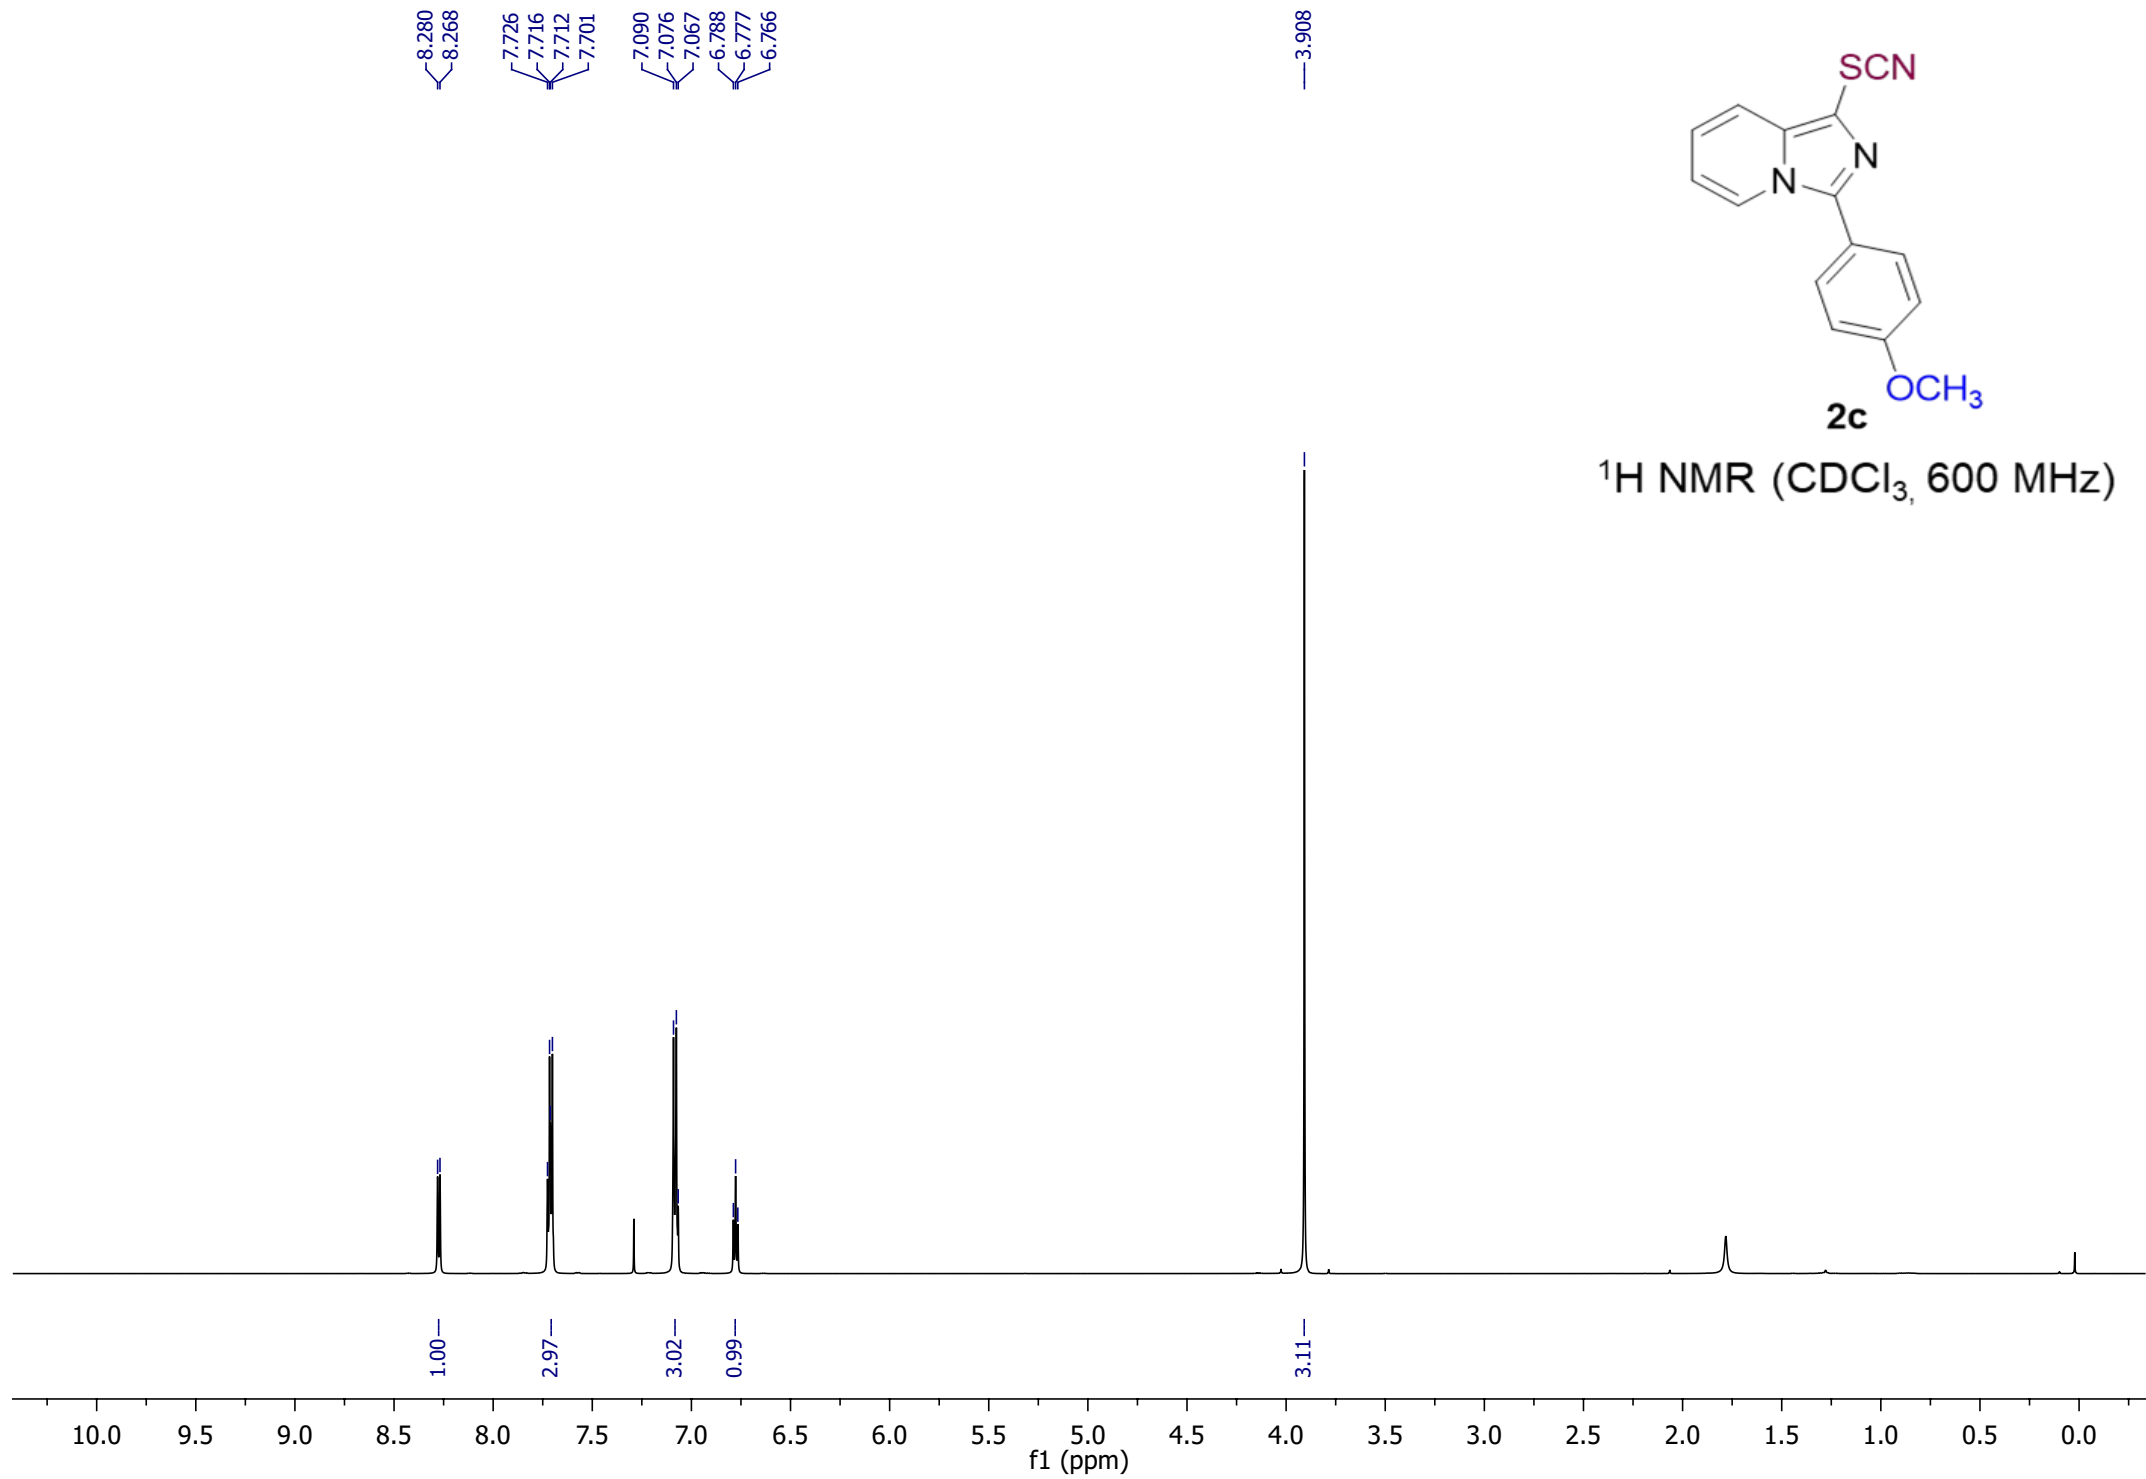

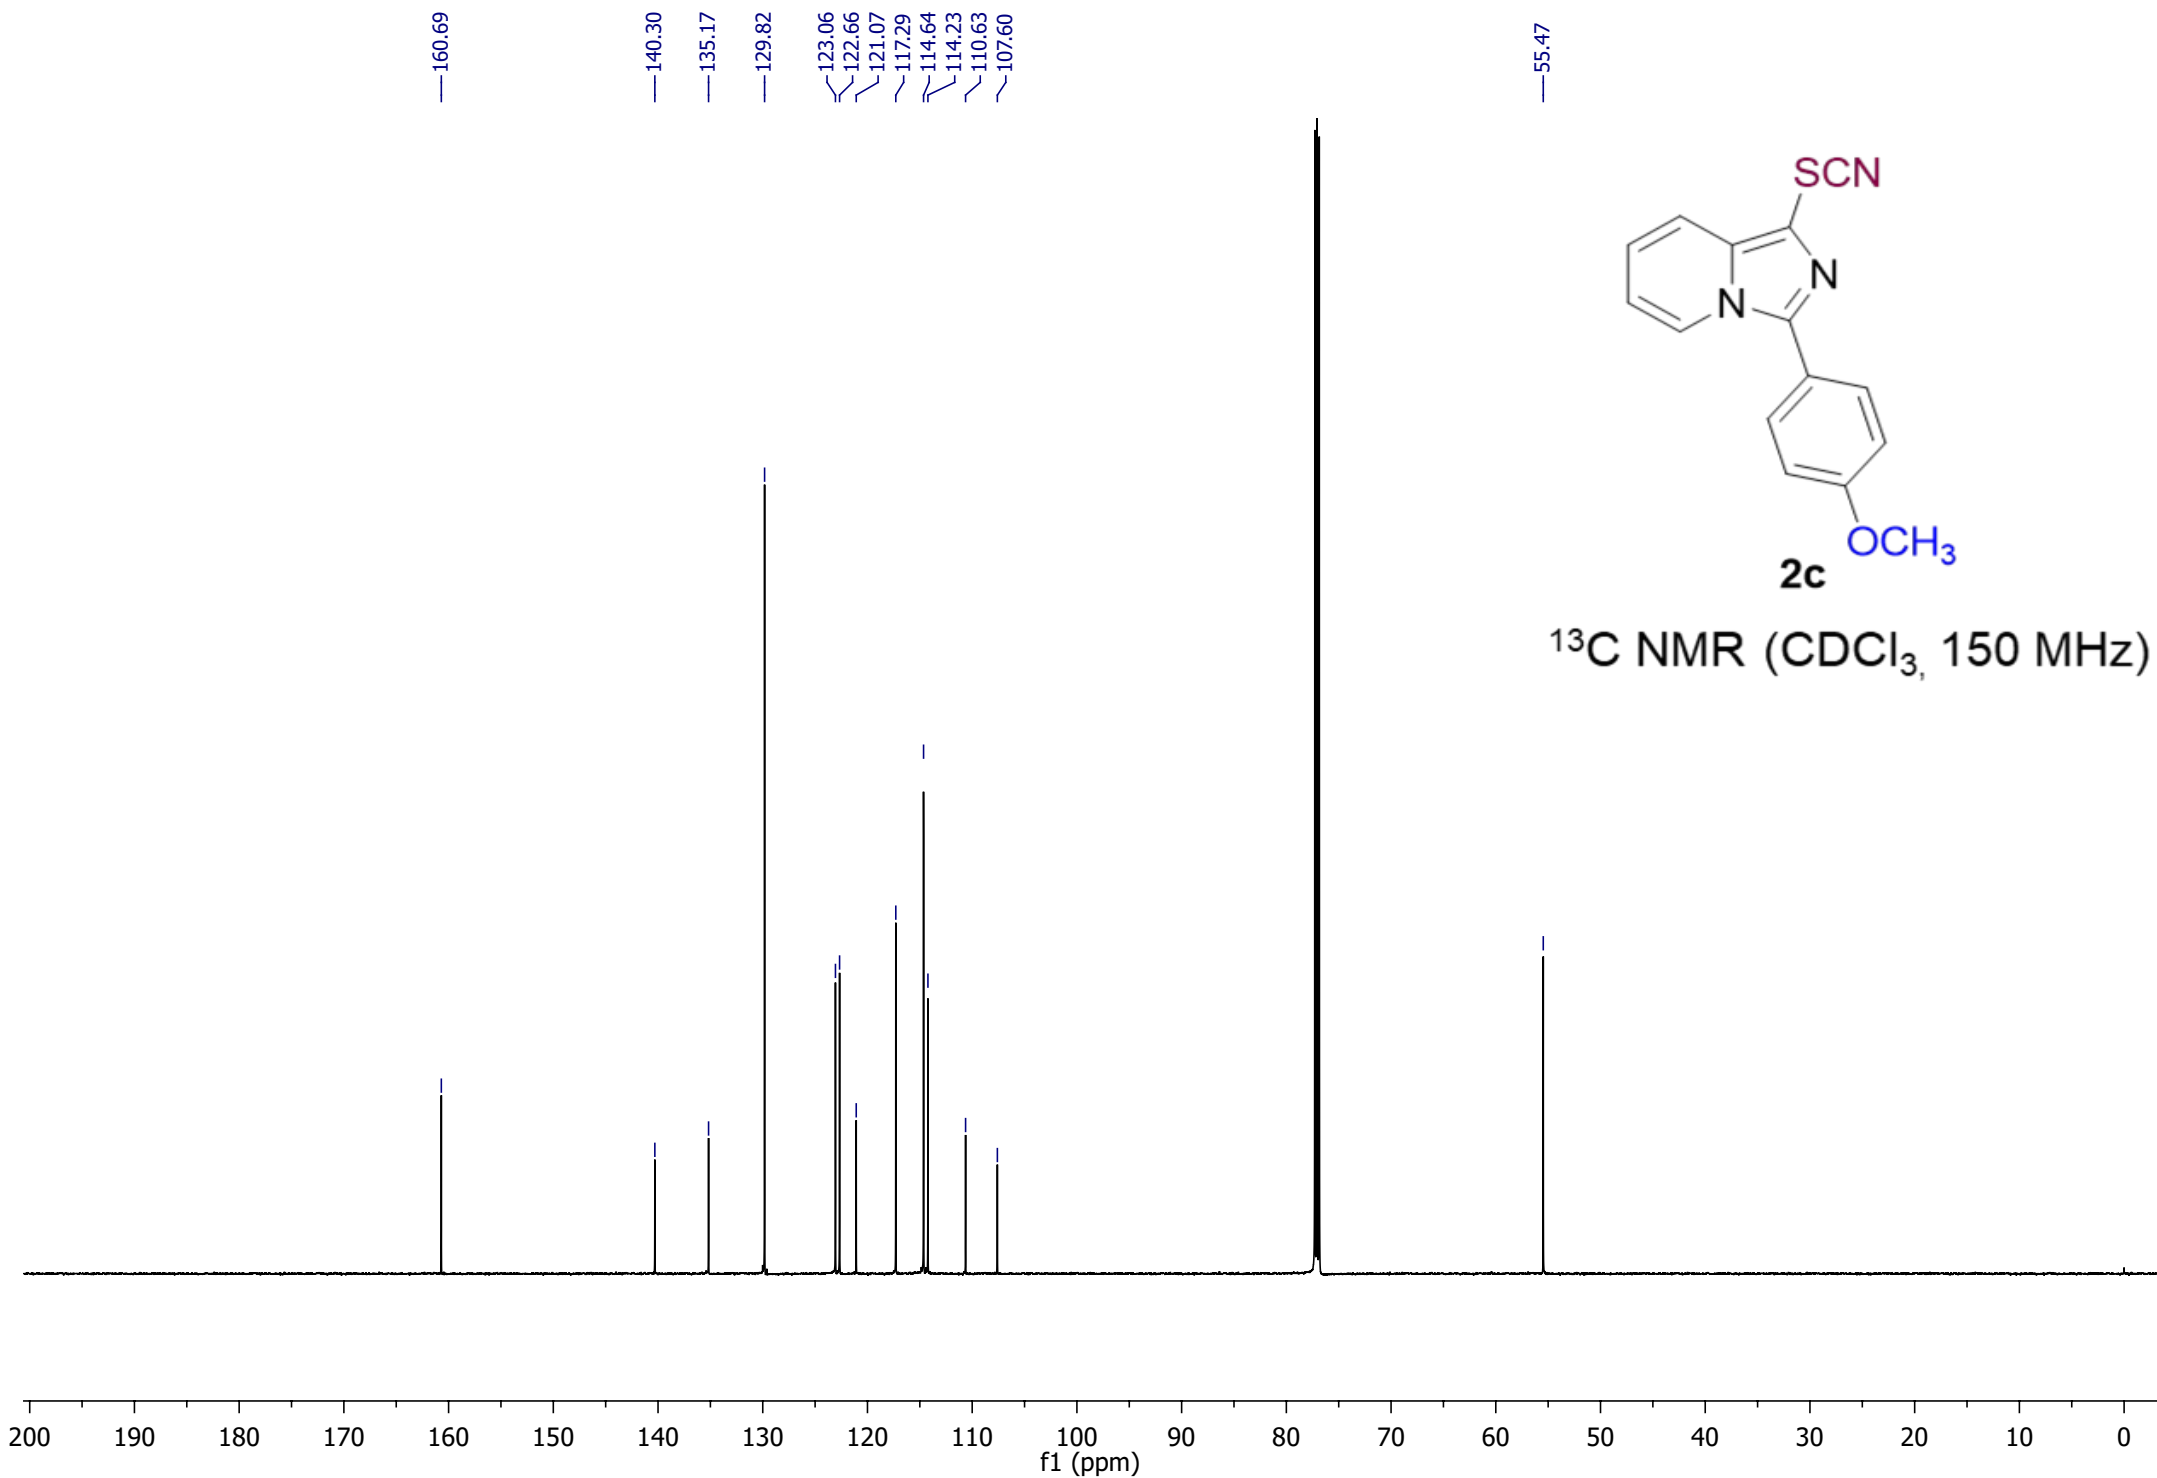

8.171  
8.159  
7.615  
7.599  
7.184  
7.179  
7.166  
7.152  
7.138  
7.135  
7.132  
7.040  
7.020  
7.009  
7.009  
7.005  
6.994  
6.823  
6.820  
6.810  
6.809  
6.807  
6.690  
6.688  
6.677  
6.667  
6.665

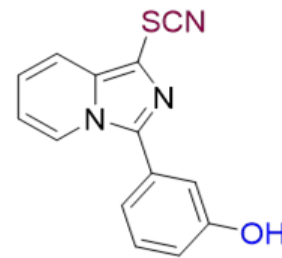

2d

$^1\text{H}$  NMR ( $\text{CDCl}_3$ , 600 MHz)

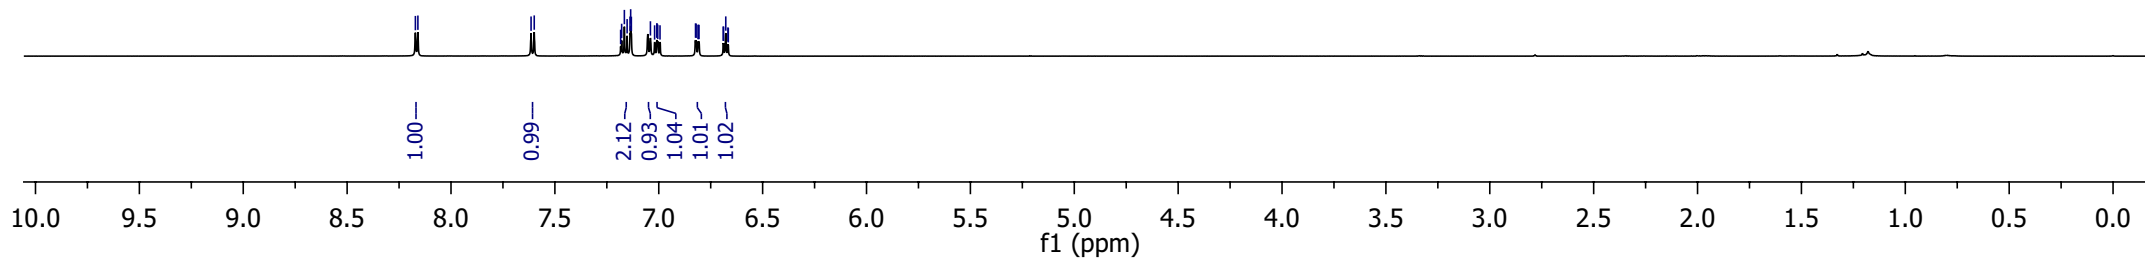

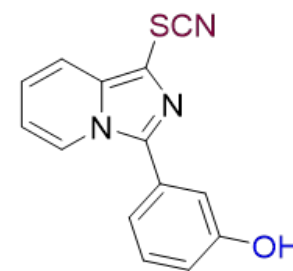

2d  
<sup>13</sup>C NMR (CDCl<sub>3</sub>, 150 MHz)

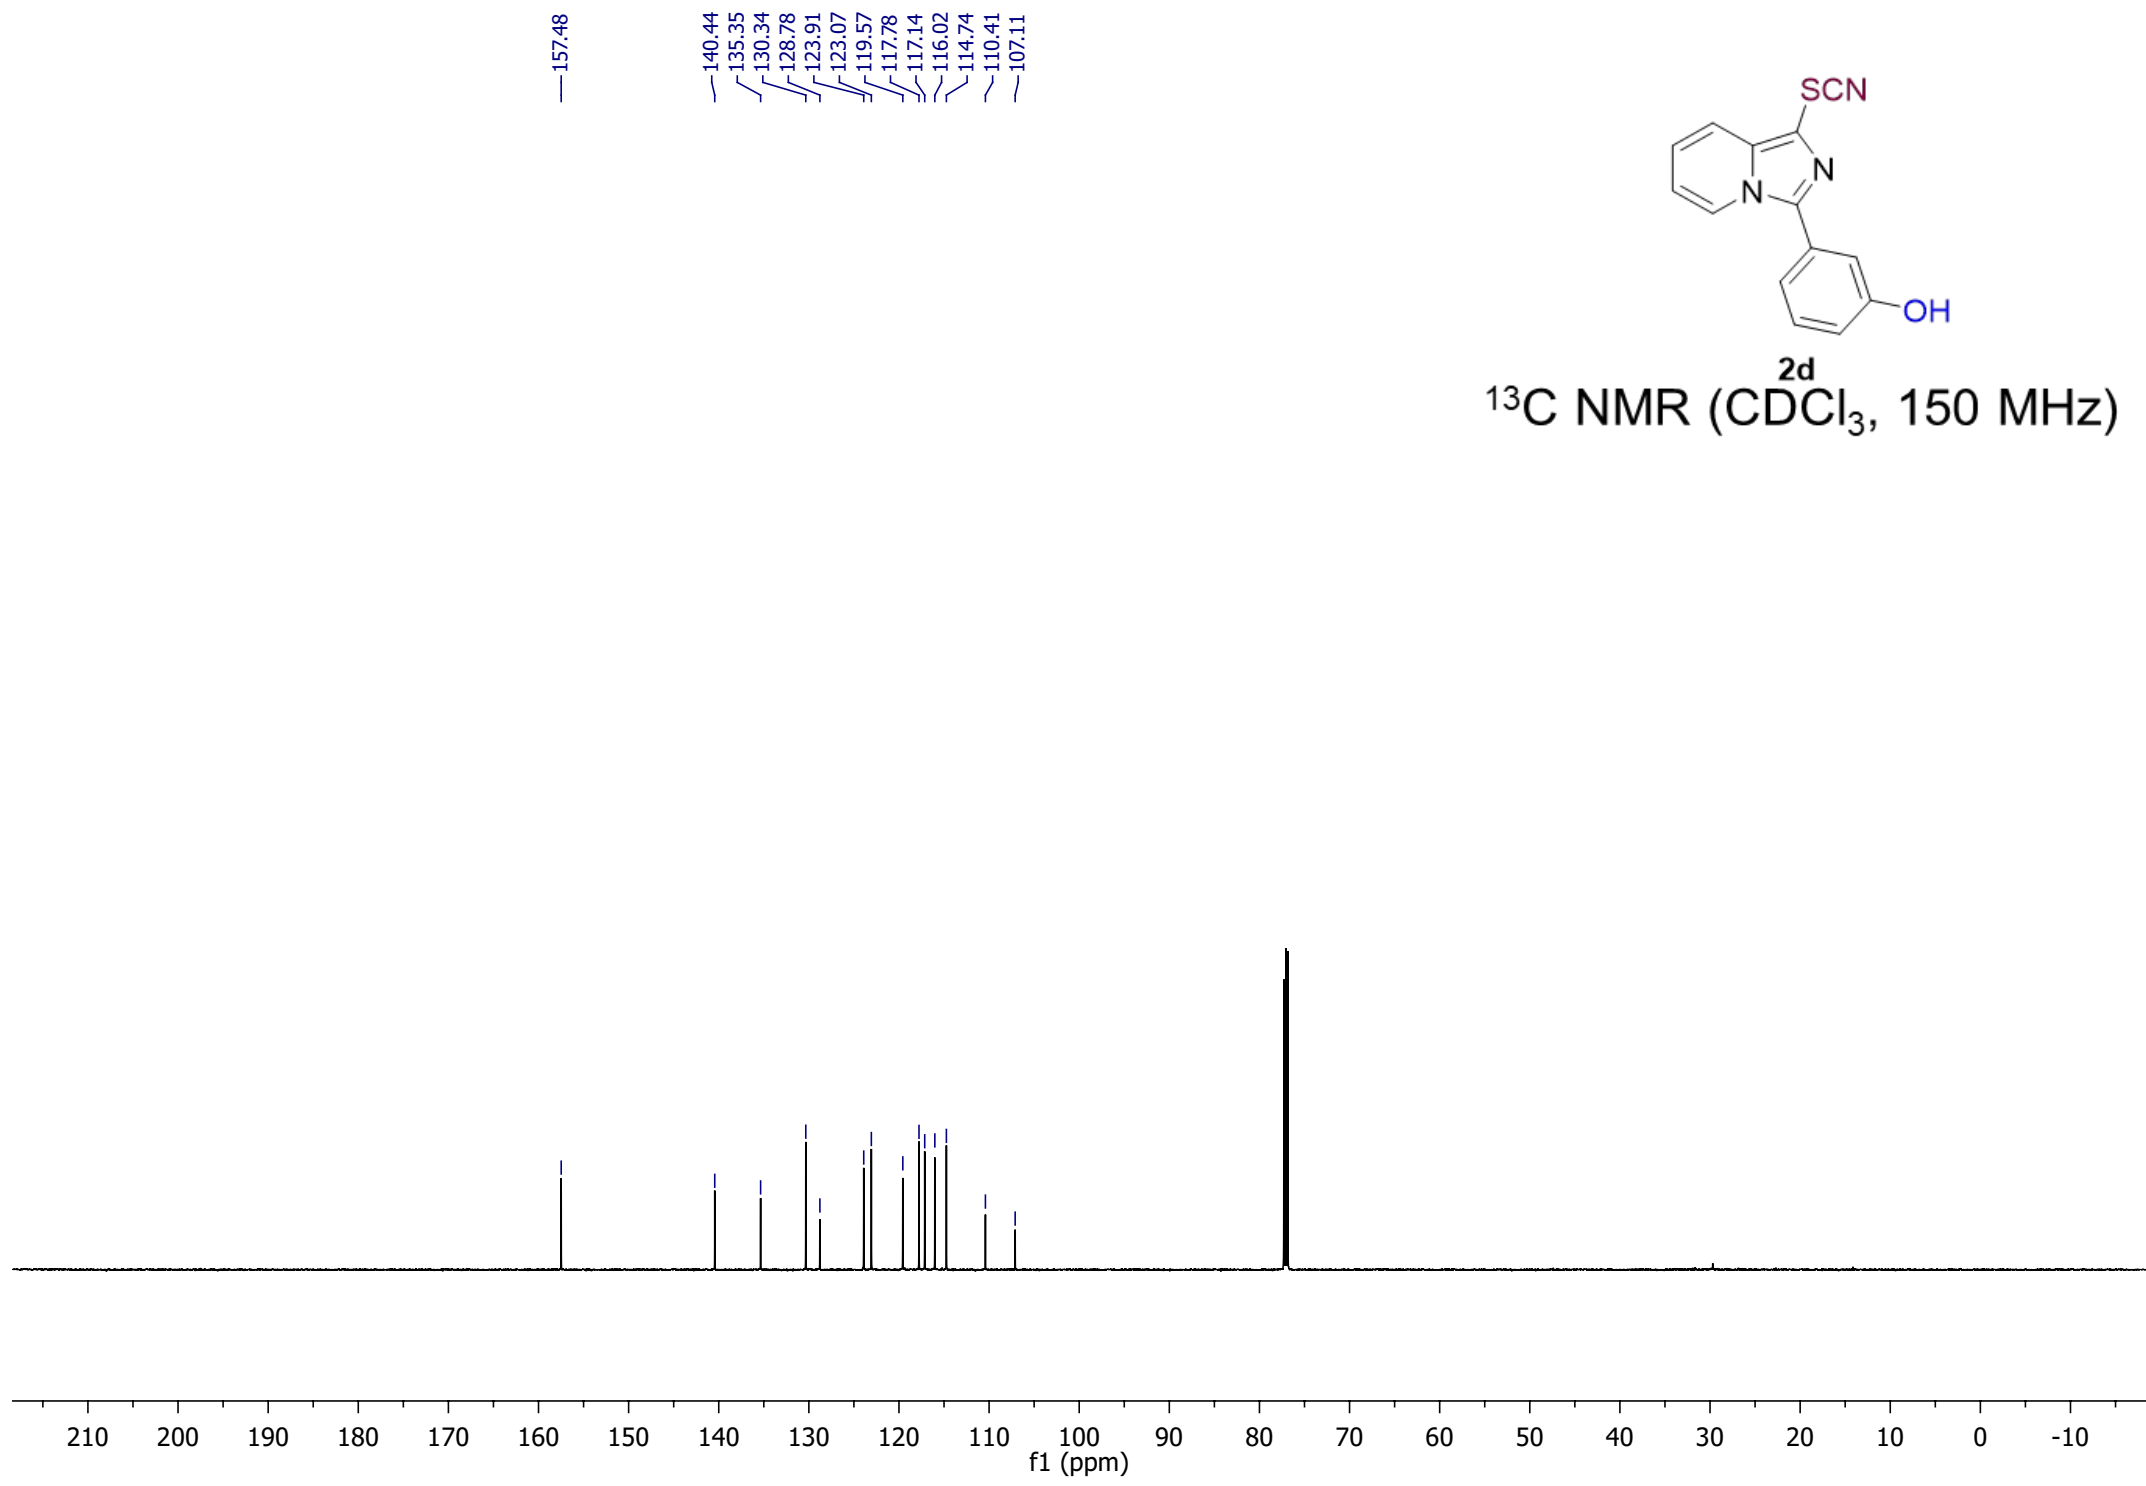

8.278  
8.263  
7.796  
7.786  
7.779  
7.768  
7.291  
7.285  
7.274  
6.842  
6.840  
6.827  
6.815  
6.812

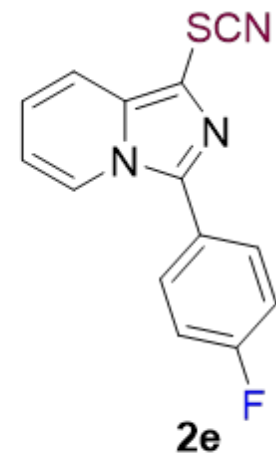

$^1\text{H}$  NMR ( $\text{CDCl}_3$ , 500 MHz)

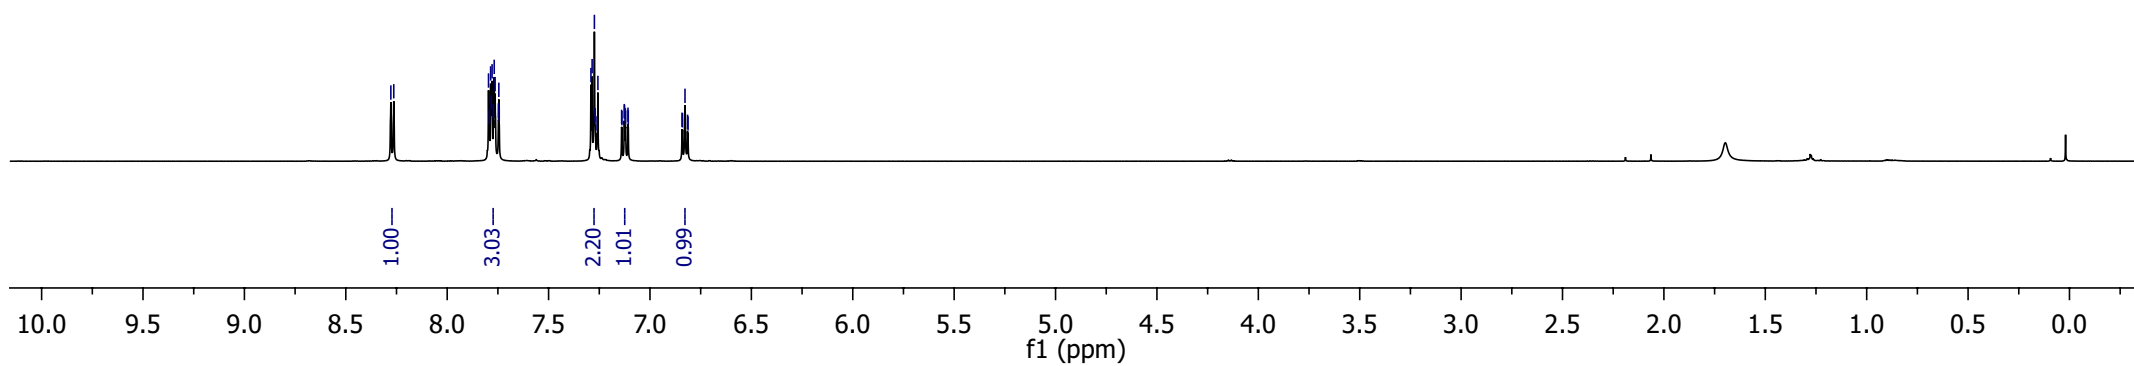

164.43  
162.43

139.28  
135.35  
130.44  
130.37  
124.95  
123.32  
117.42  
117.44  
116.56  
116.38  
114.63  
110.42  
108.26

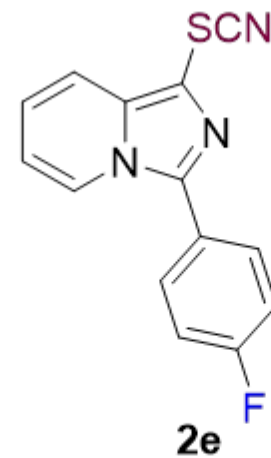

<sup>13</sup>C NMR (CDCl<sub>3</sub>, 125 MHz)

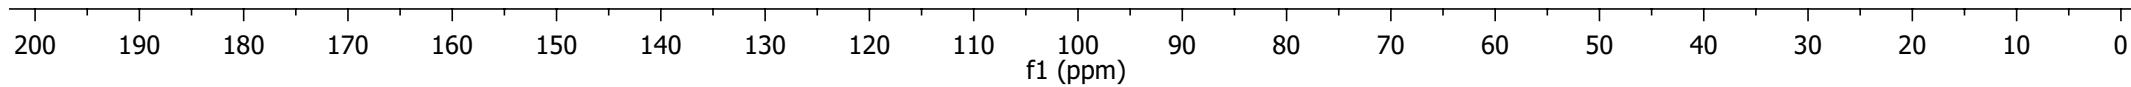

-109.901  
-109.912  
-109.919  
-109.924  
-109.930  
-109.937  
-109.941  
-109.948  
-109.953  
-109.959

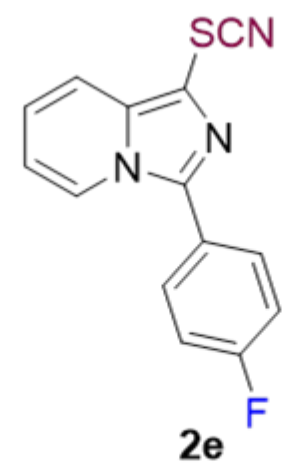

<sup>19</sup>F NMR (CDCl<sub>3</sub>, 471 MHz)

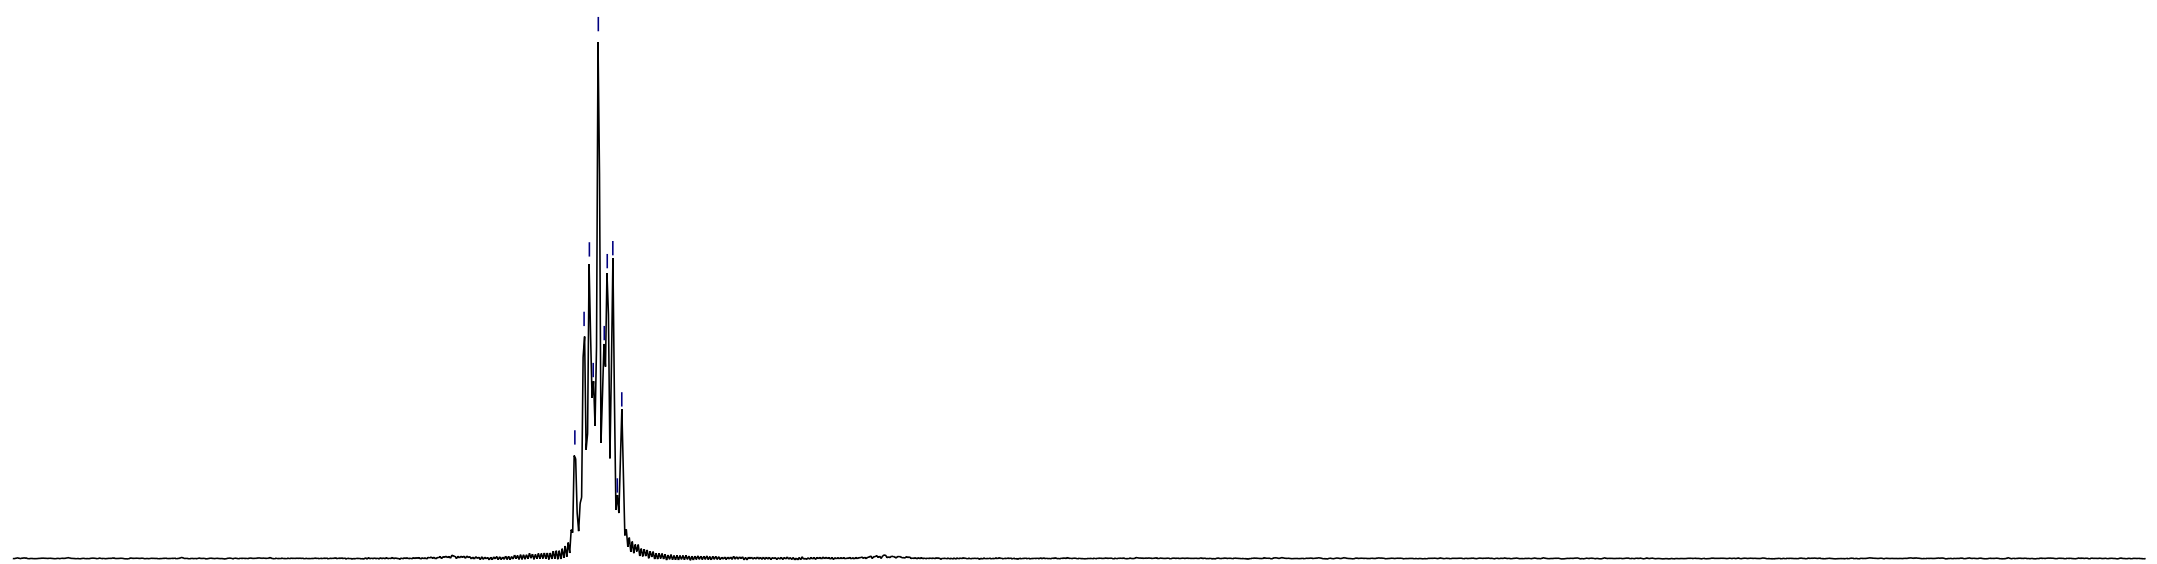

-109.3    -109.5    -109.7    -109.9    -110.1    -110.3    -110.5    -110.7    -110.9    -111.1    -111.3    -111.5    -111.7  
f1 (ppm)



8.201  
8.189  
7.667  
7.651  
7.637  
7.458  
7.444  
7.037  
6.933  
6.755  
6.744  
6.732

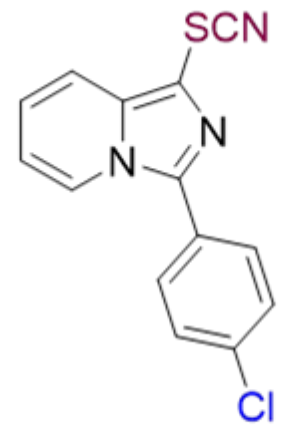

2f

<sup>1</sup>H NMR (CDCl<sub>3</sub>, 600 MHz)

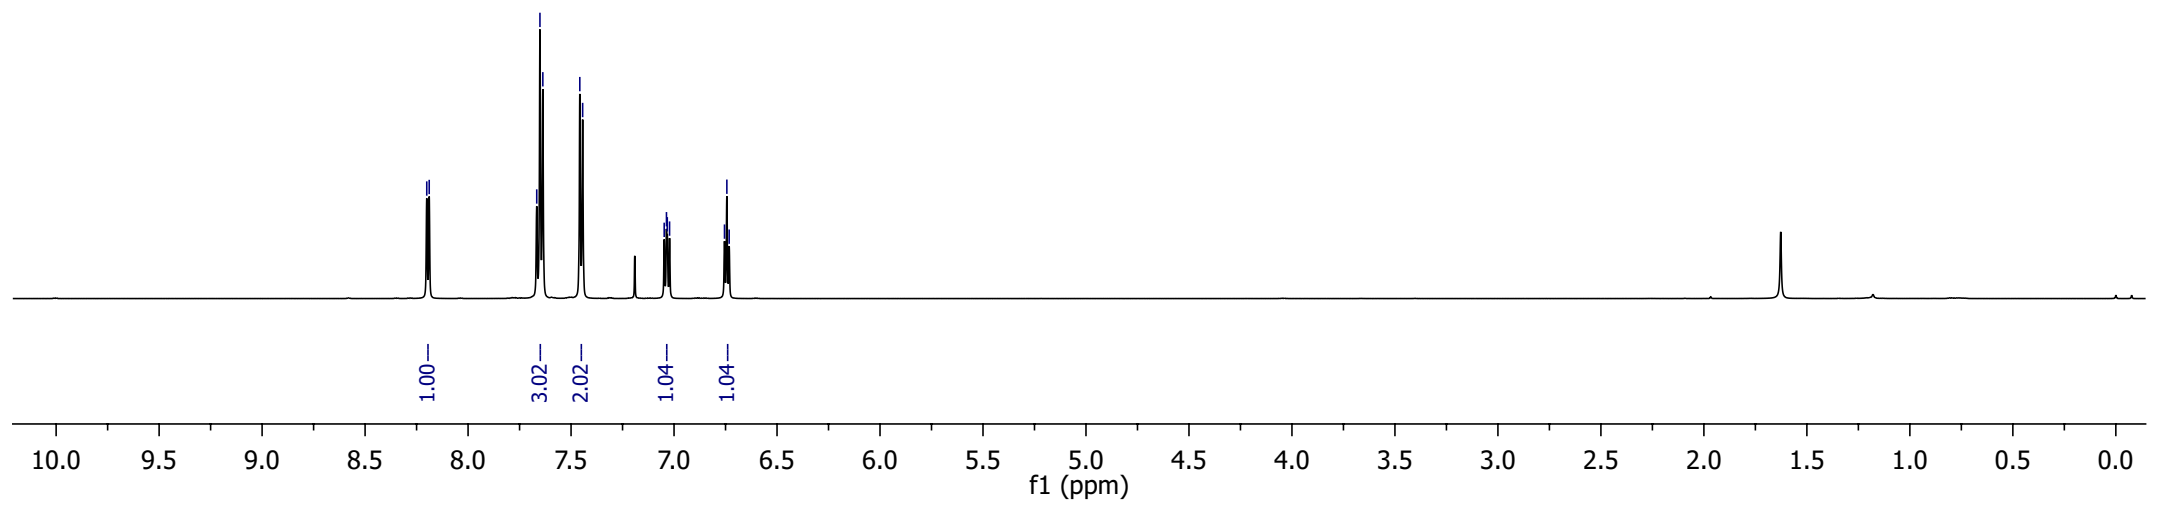

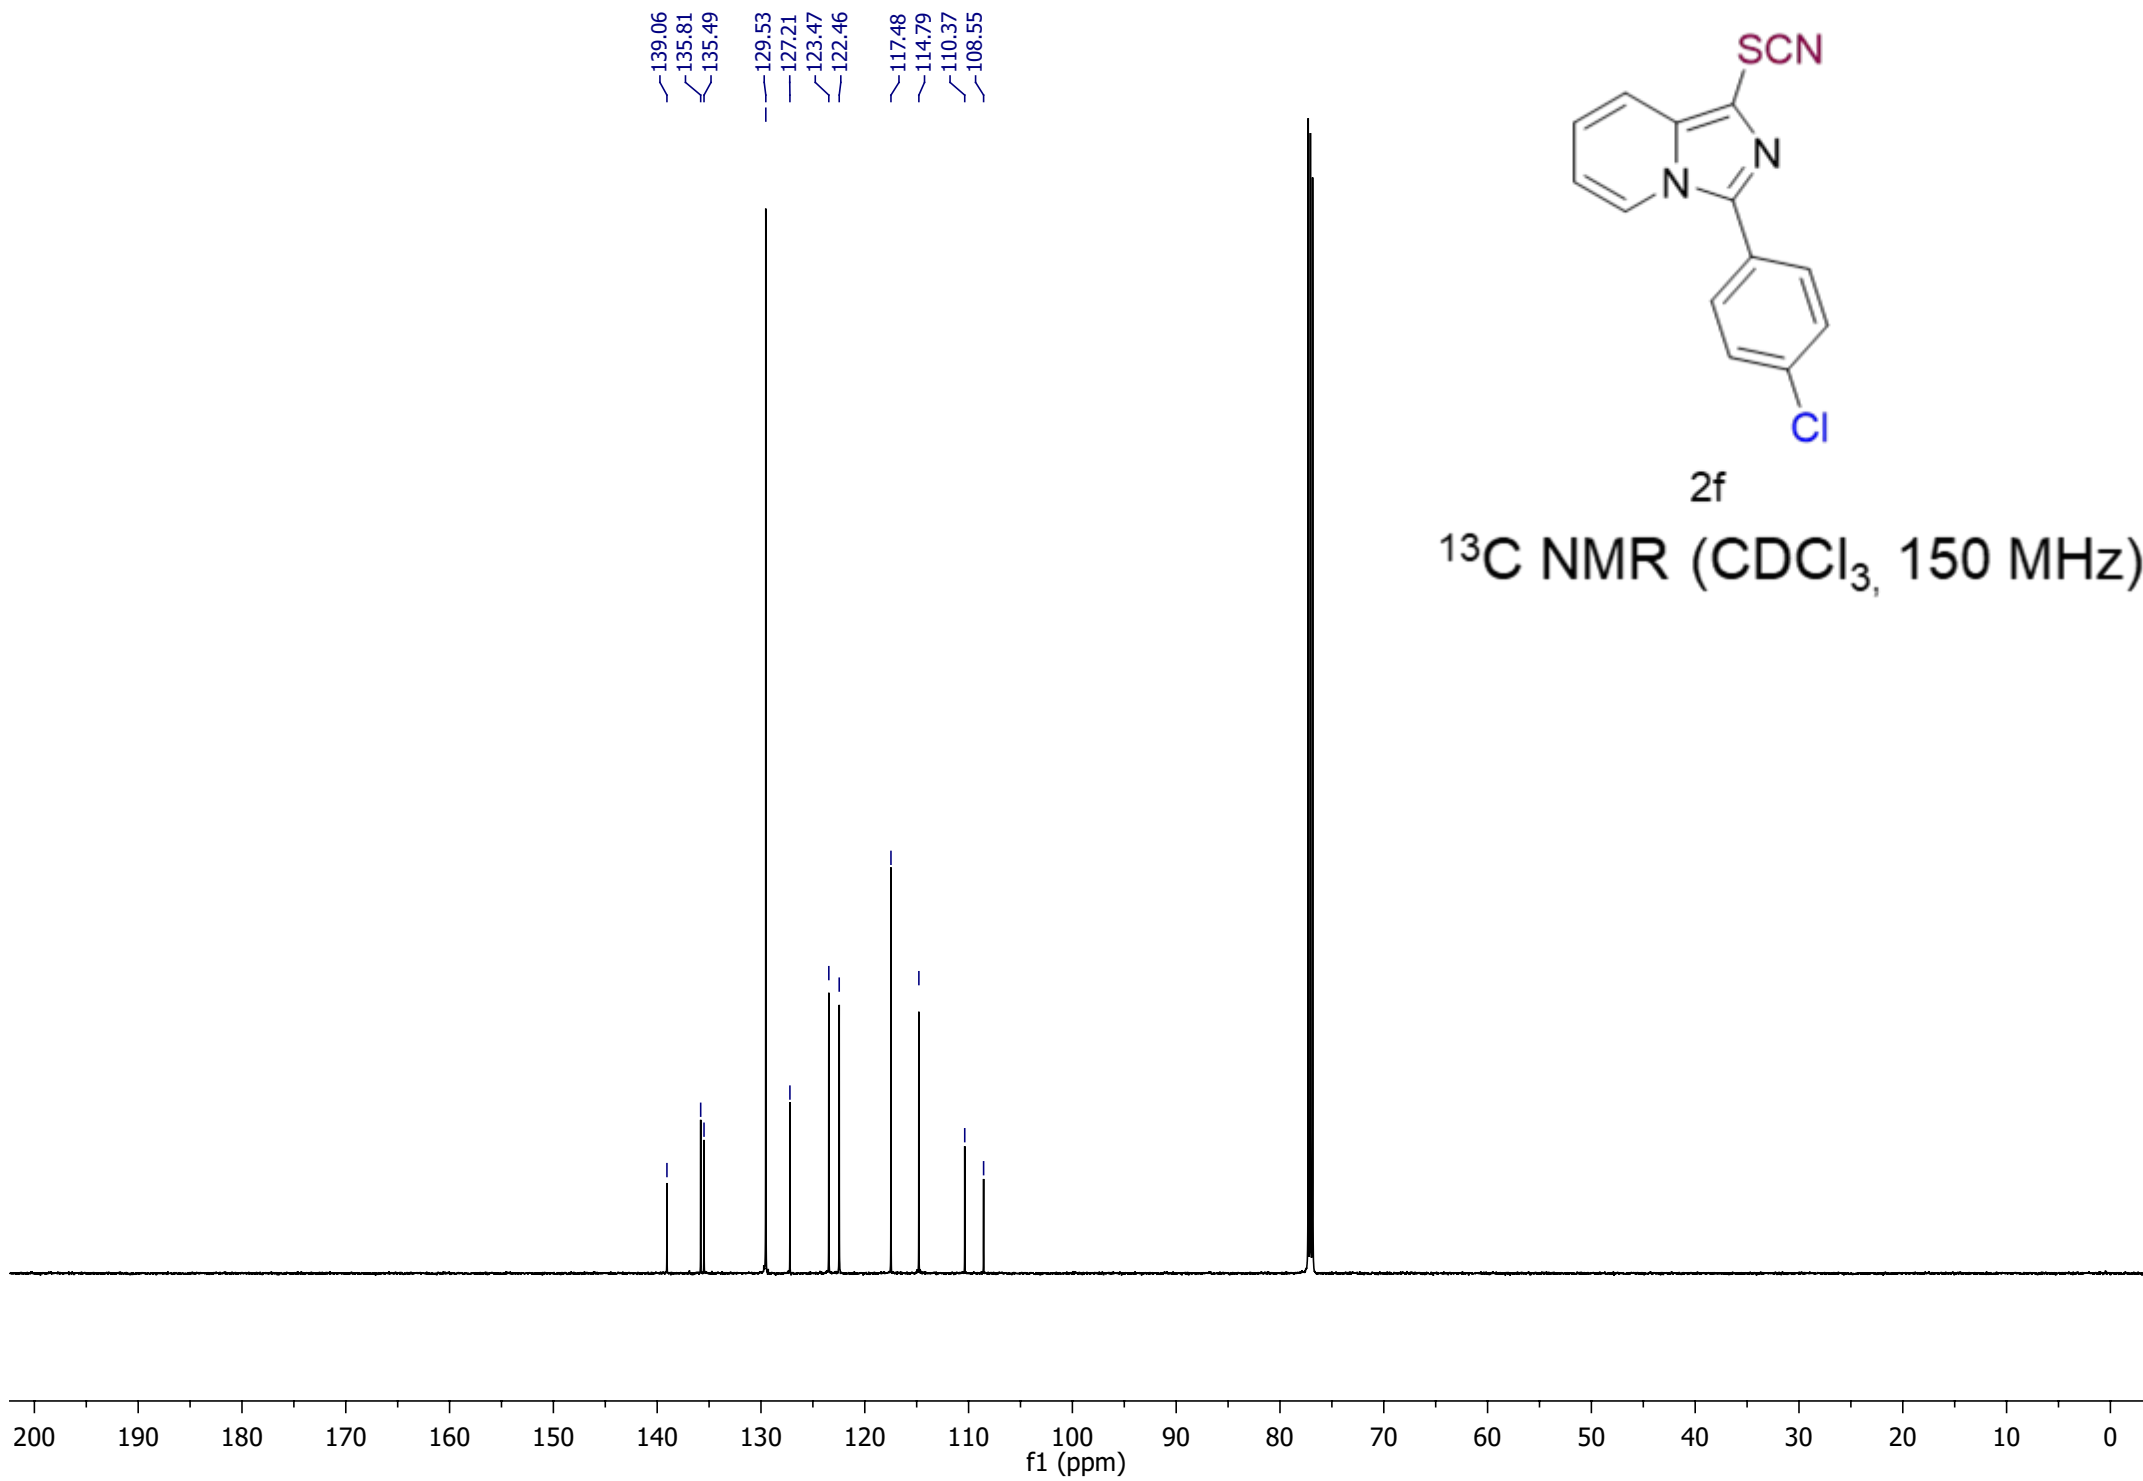

8.318  
8.306  
7.944  
7.753  
7.738  
7.722  
7.709  
7.623  
7.426  
7.130  
7.127  
6.857  
6.846  
6.834

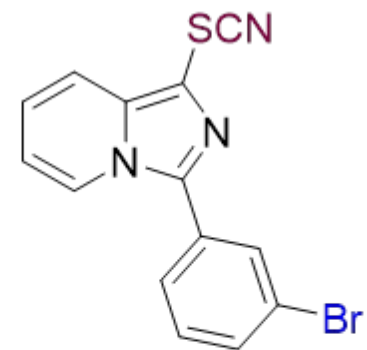

2g

$^1\text{H}$  NMR ( $\text{CDCl}_3$ , 600 MHz)

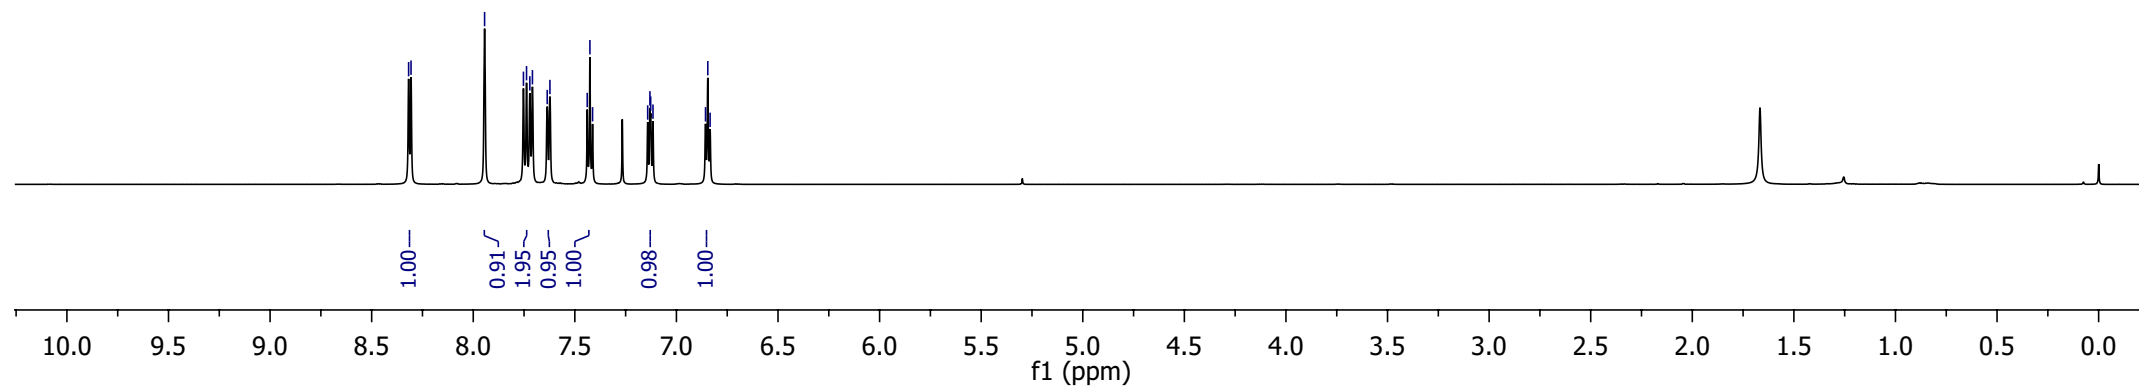

138.54  
135.55  
132.76  
131.20  
130.72  
130.67  
126.66  
123.61  
123.31  
122.49  
117.49  
114.93  
110.30  
108.76

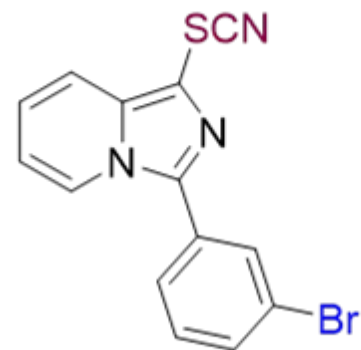

2g

$^{13}\text{C}$  NMR ( $\text{CDCl}_3$ , 150 MHz)

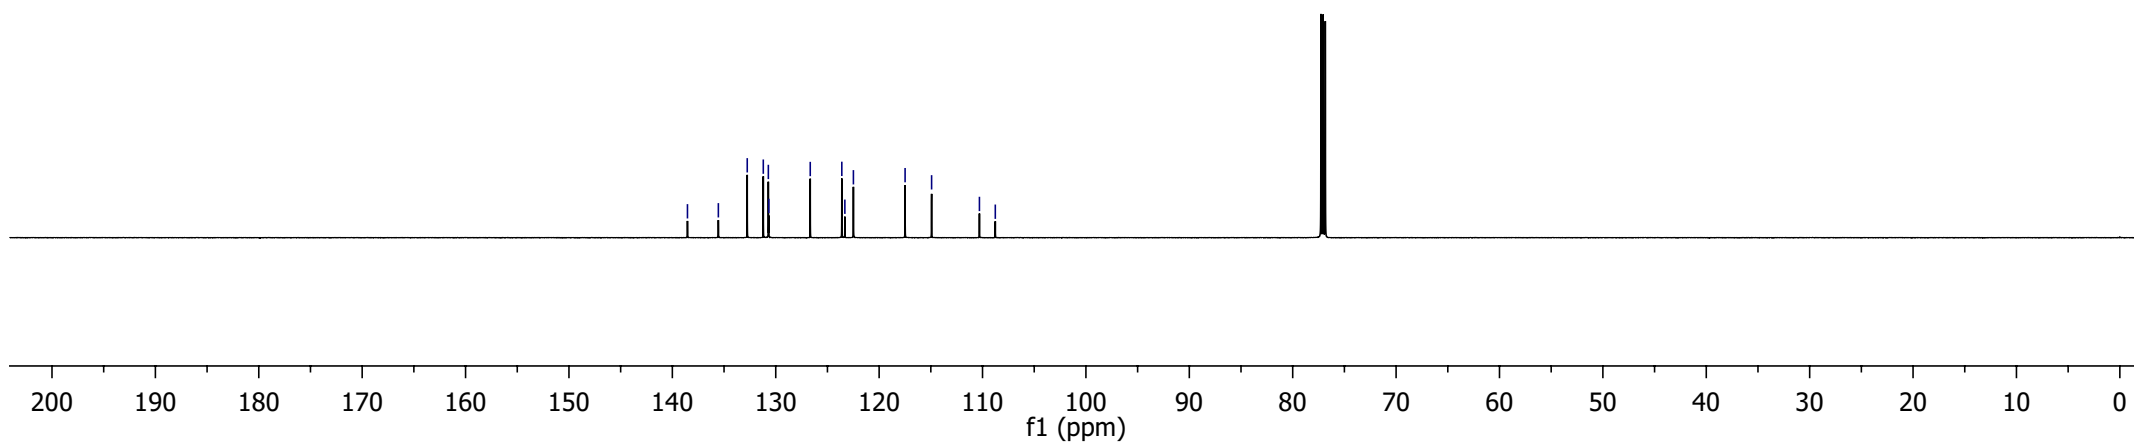

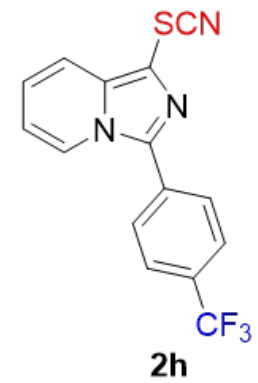

$^1\text{H}$  NMR ( $\text{CDCl}_3$ , 600 MHz)

8.277  
8.265  
7.874  
7.861  
7.759  
7.745  
7.700  
7.085  
7.081  
6.807  
6.795  
6.784

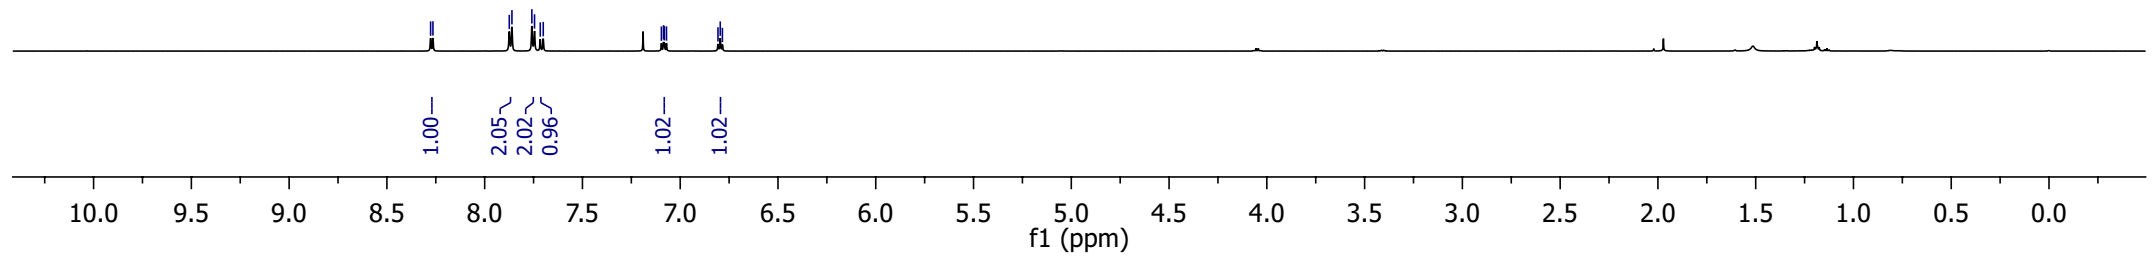

138.58  
135.71  
132.26  
131.62  
131.40  
128.50  
126.28  
126.25  
126.23  
126.21  
123.72  
122.39  
117.63  
115.10  
110.19  
109.30

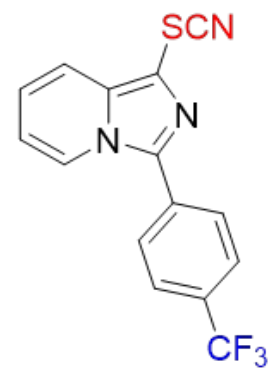

2h

<sup>13</sup>C NMR (CDCl<sub>3</sub>, 150 MHz)

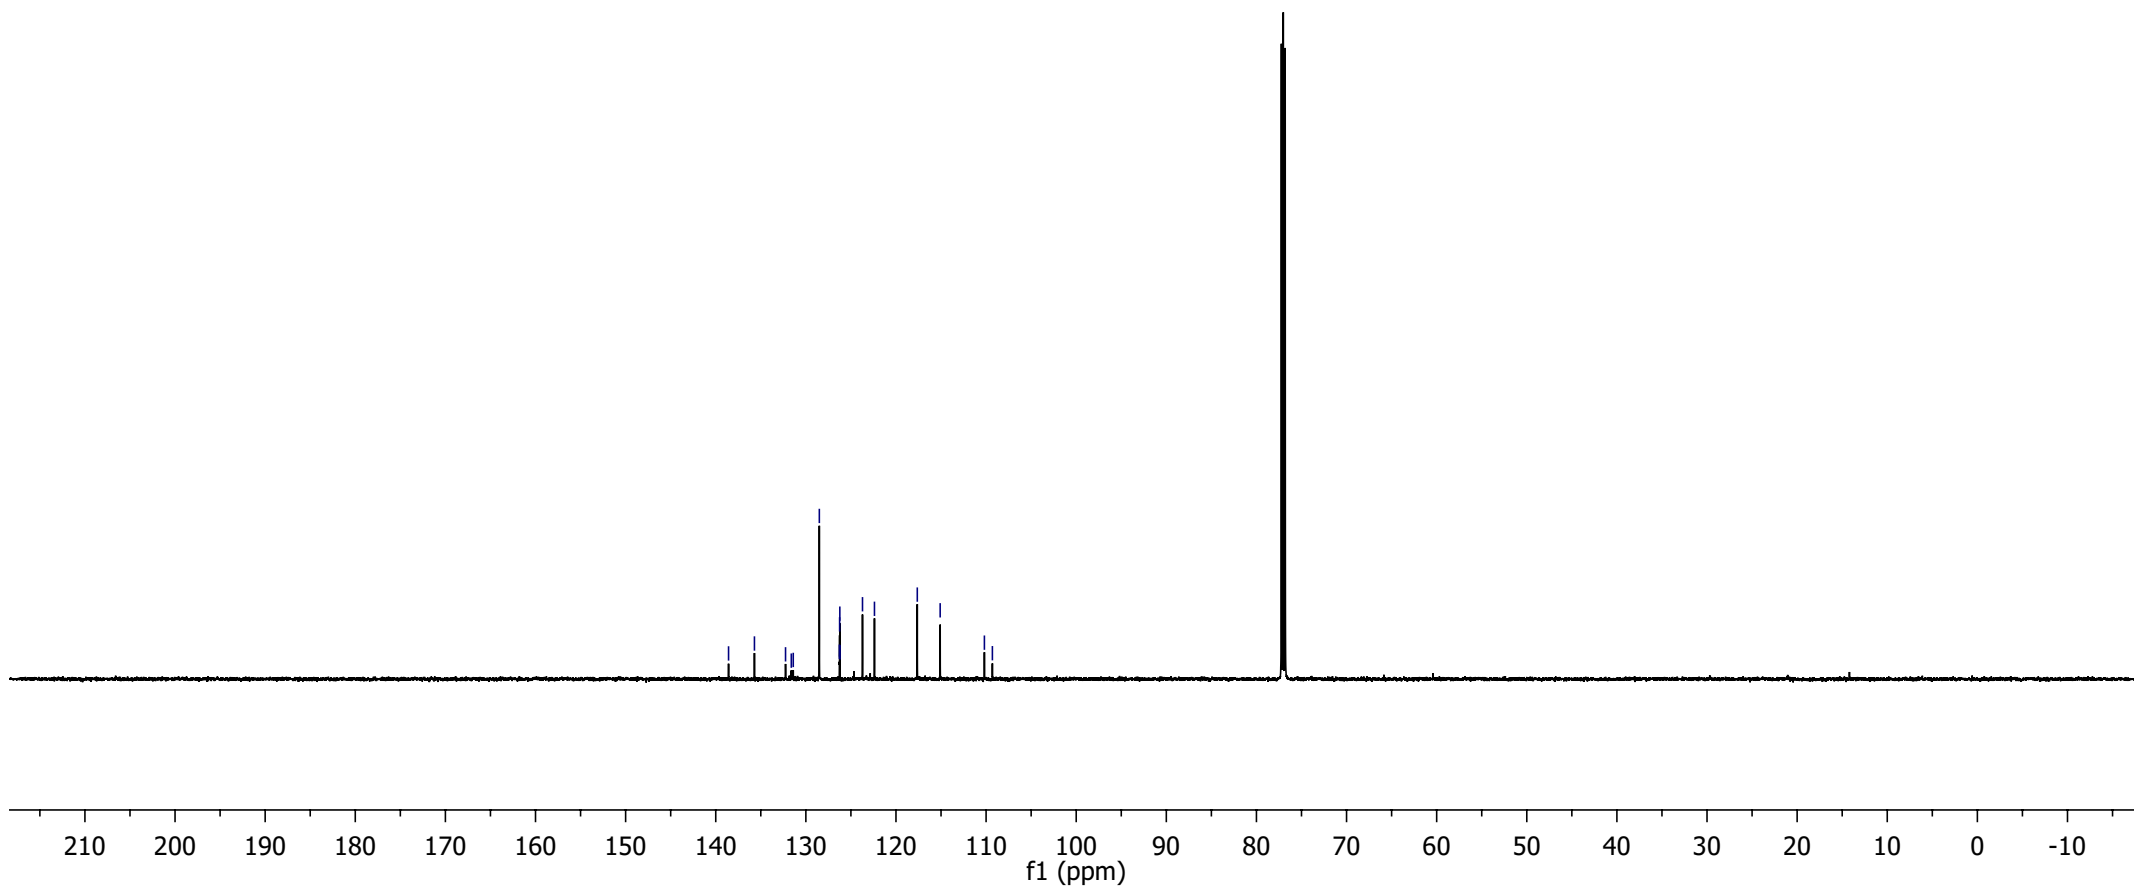

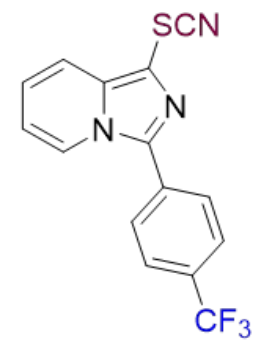

2h

<sup>19</sup>F NMR (CDCl<sub>3</sub>, 471 MHz)

-61.339

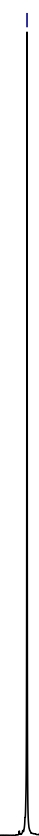

f1 (ppm)

-42 -44 -46 -48 -50 -52 -54 -56 -58 -60 -62 -64 -66 -68 -70 -72 -74 -76 -78 -80 -82 -84

8.296  
8.284  
7.836  
7.821  
7.758  
7.743  
7.416  
7.402  
7.127  
7.123  
6.845  
6.834  
6.823

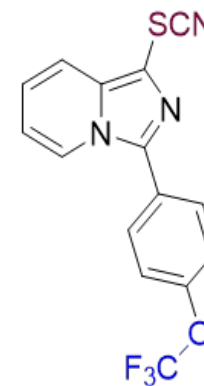

2i

$^1\text{H NMR}$  ( $\text{CDCl}_3$ , 600 MHz)

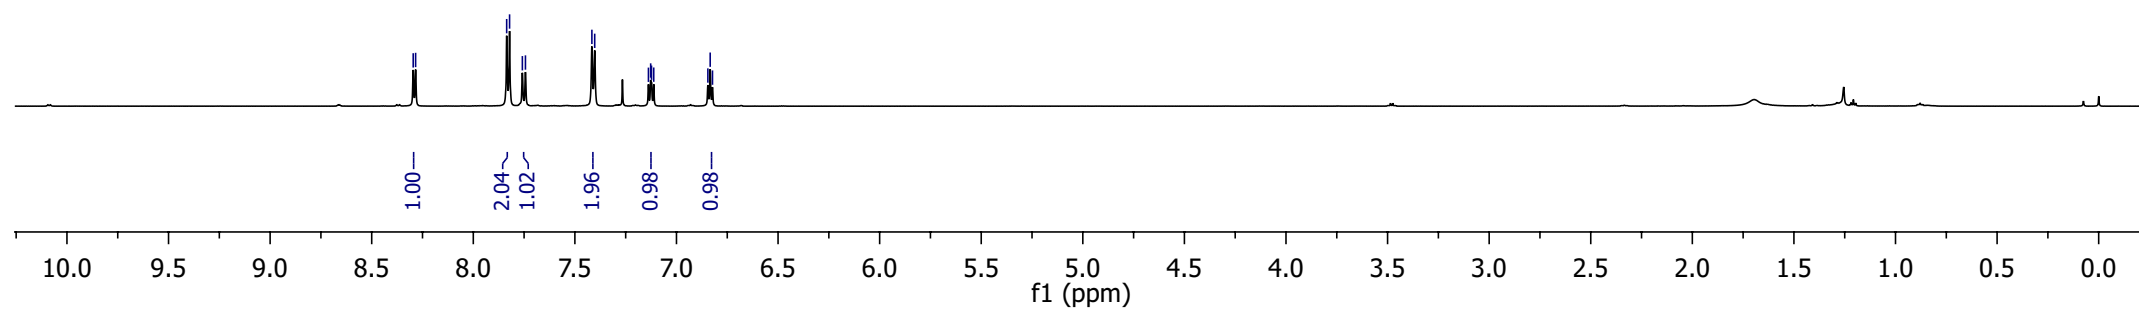



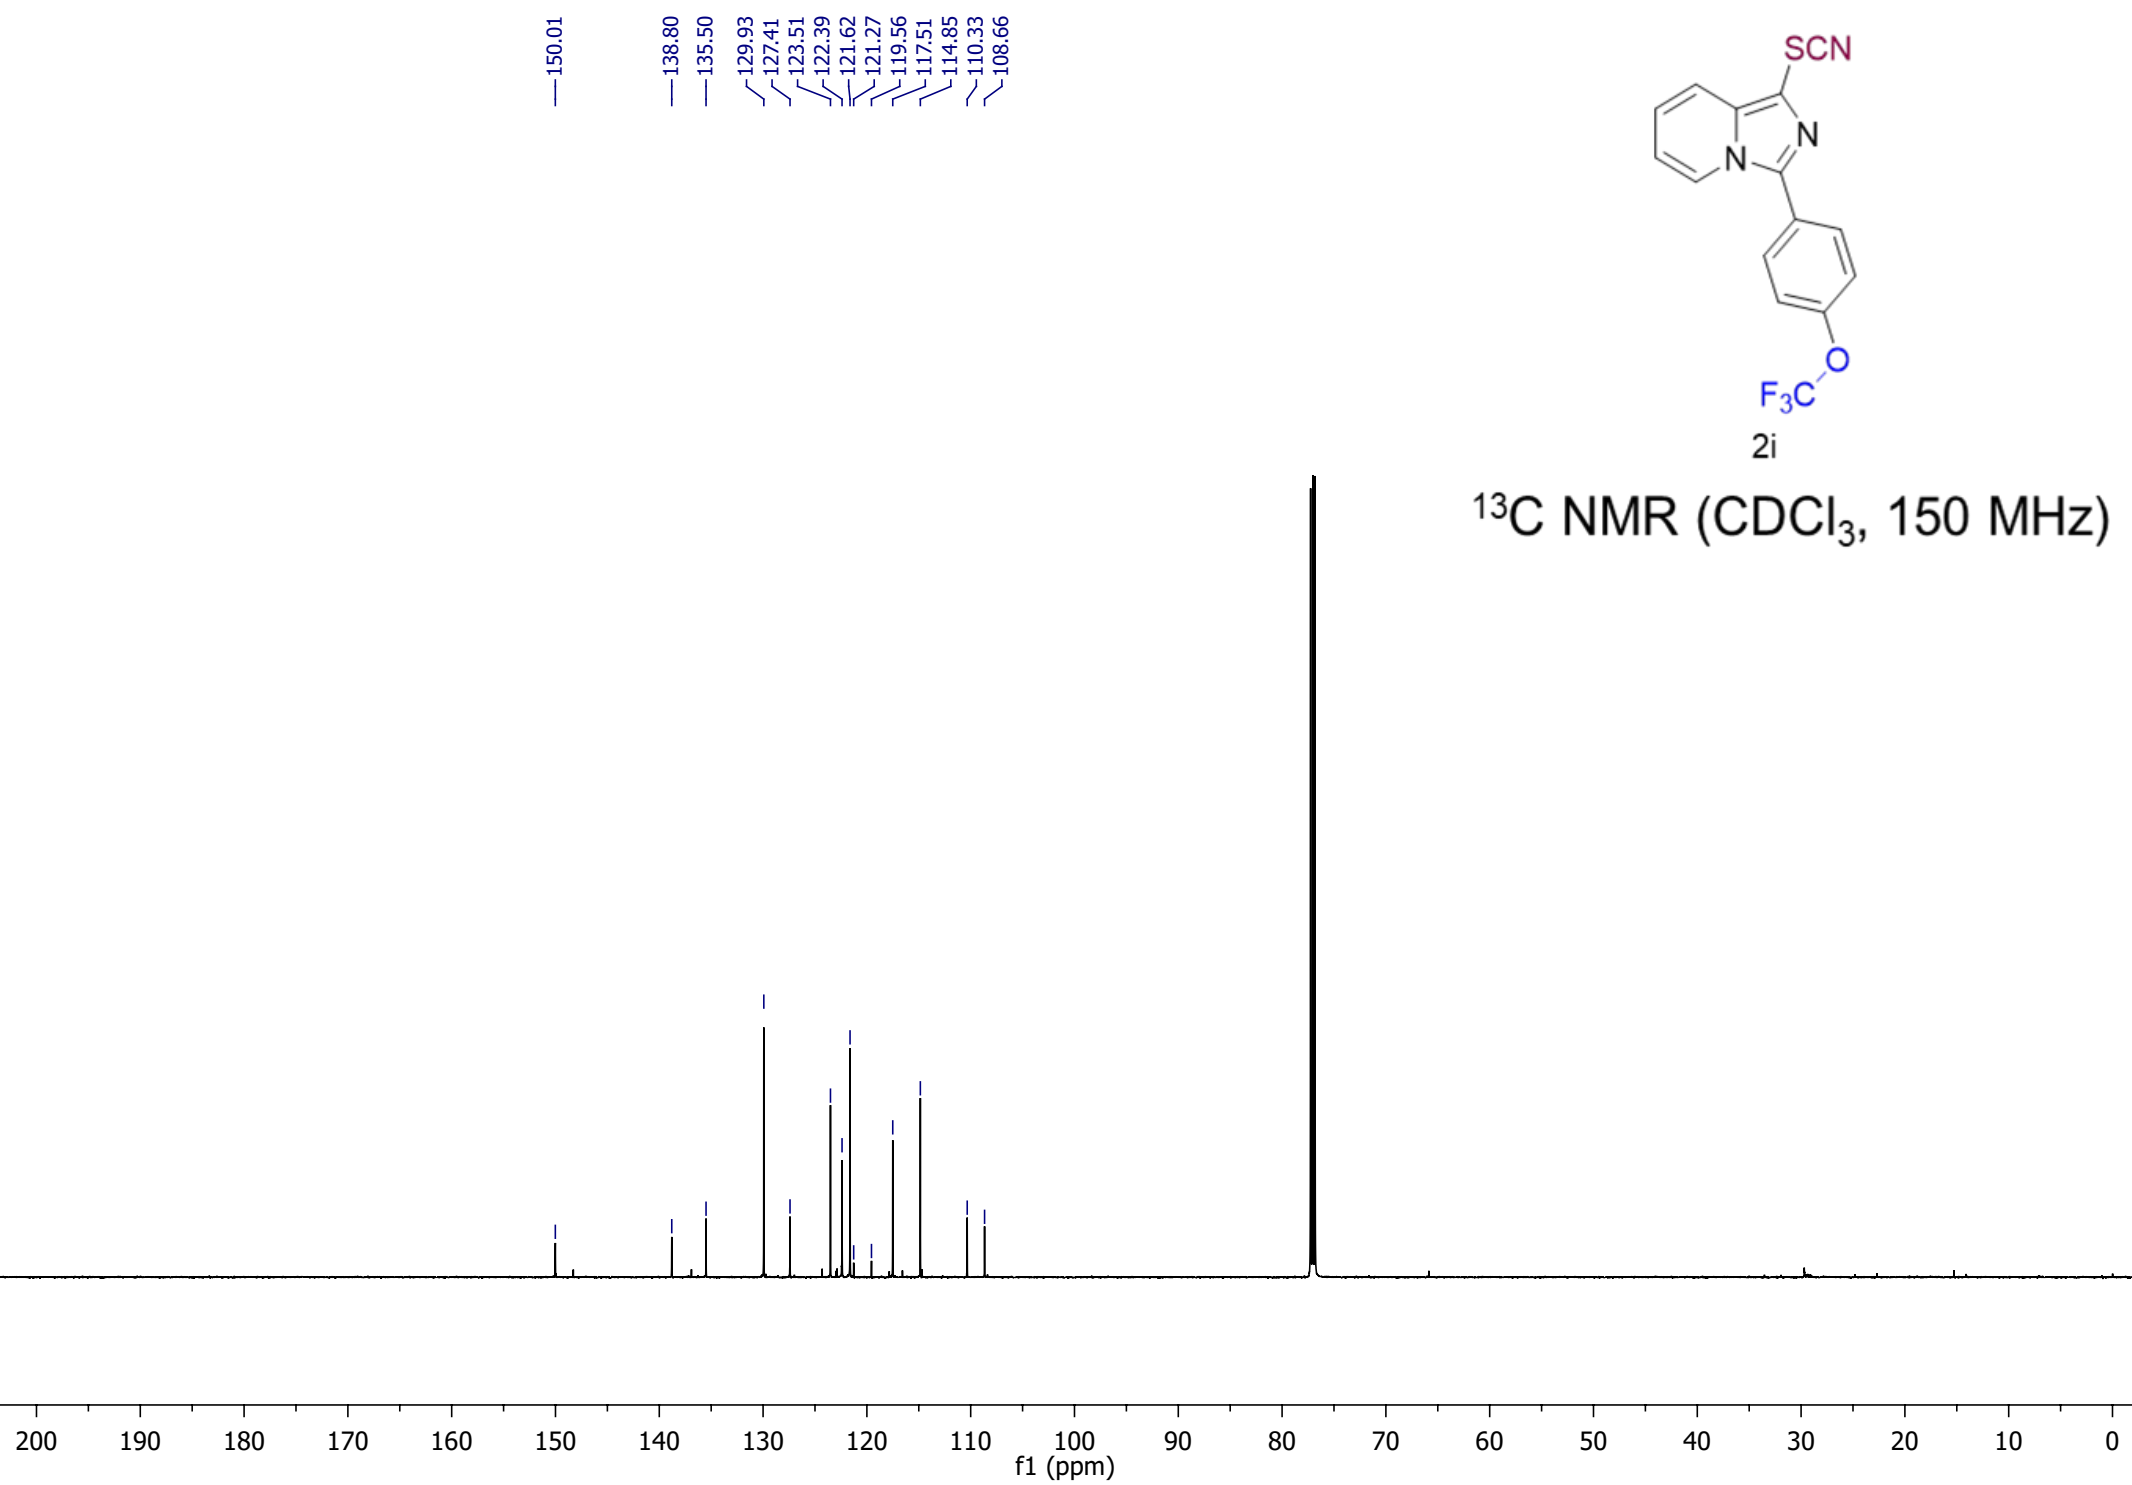

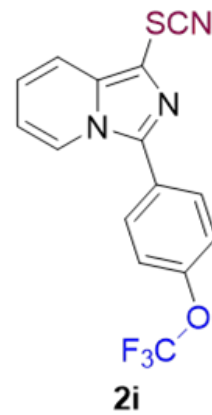

$^{19}\text{F}$  NMR ( $\text{CDCl}_3$ , 471 MHz)

-57.728

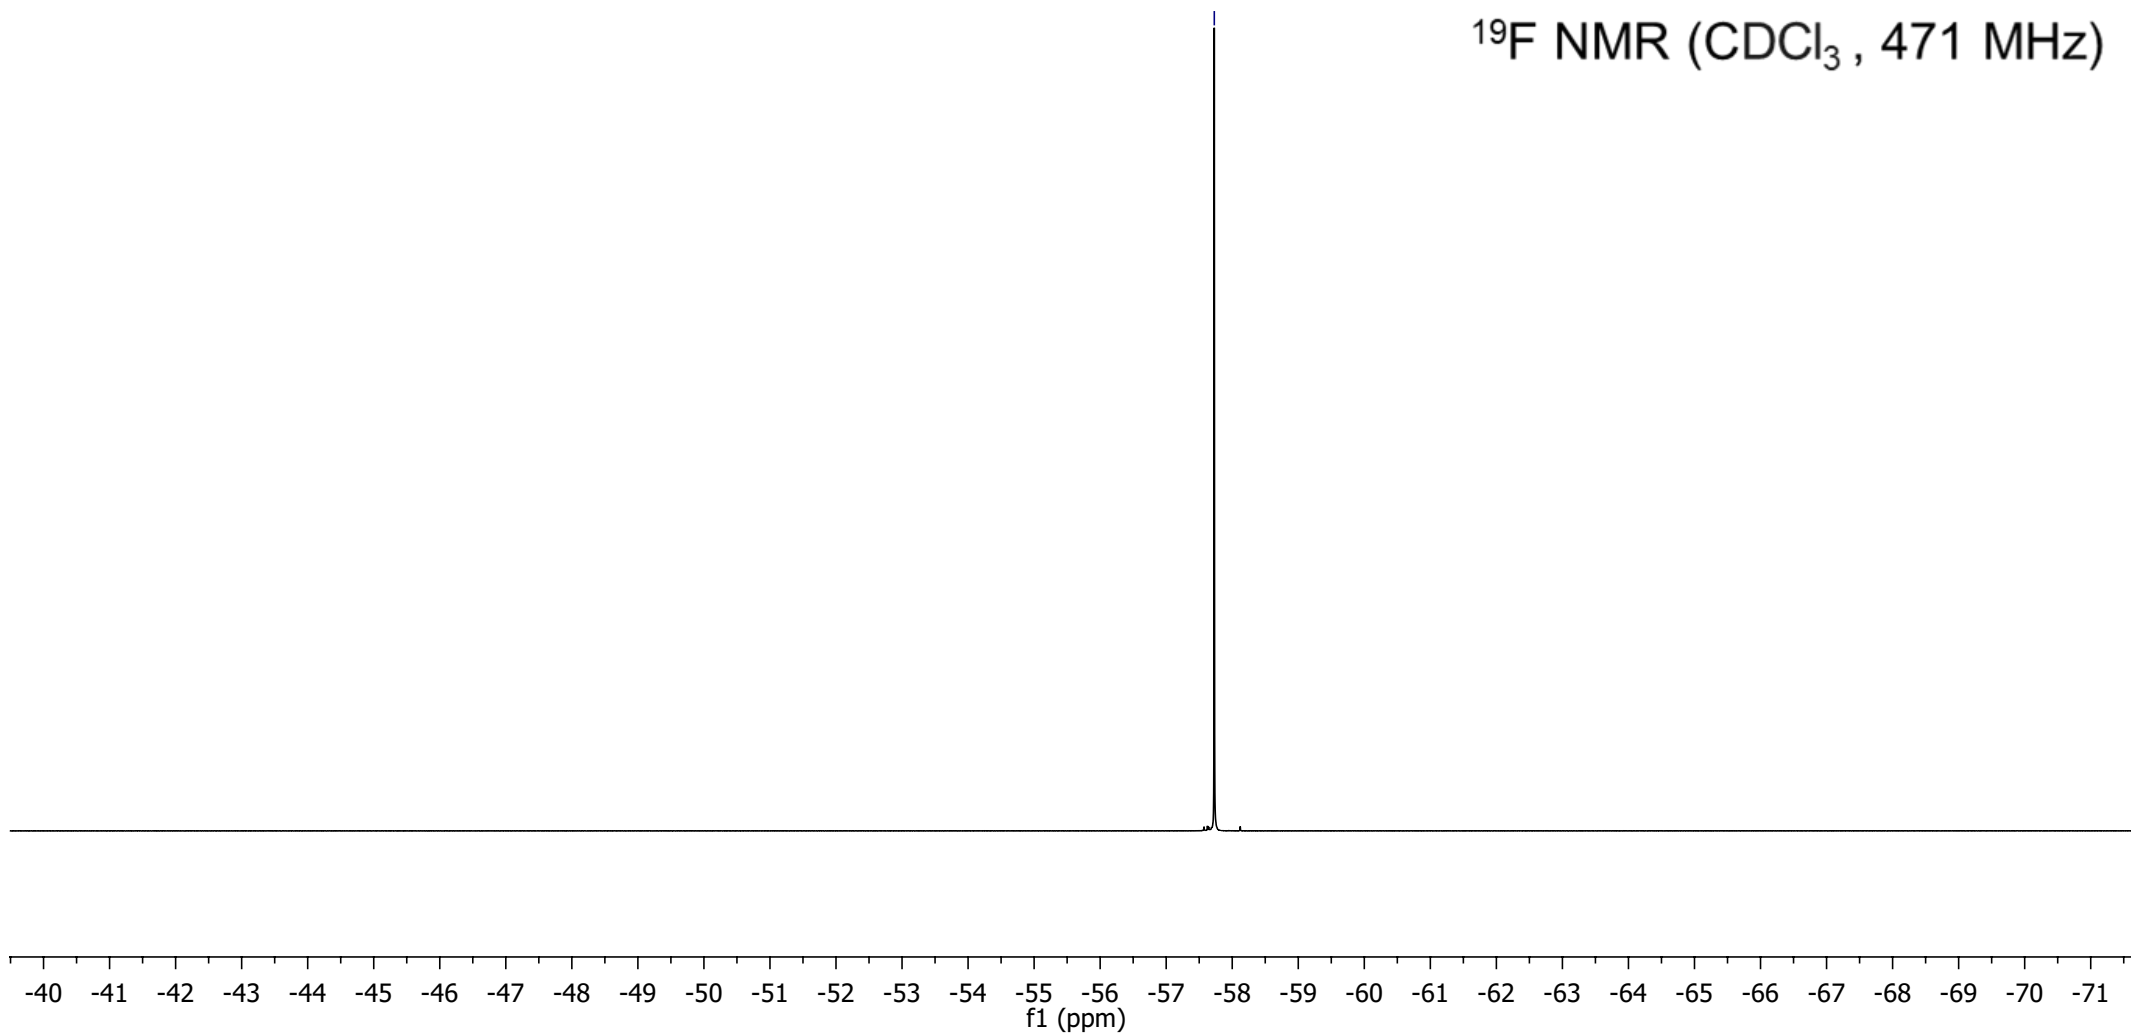

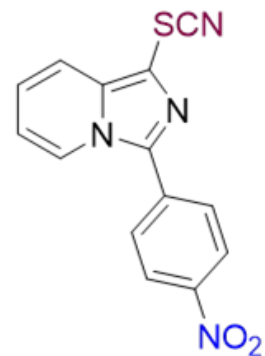

2j

<sup>1</sup>H NMR (CDCl<sub>3</sub>, 600 MHz)

8.454  
8.451  
8.442  
8.439  
8.436  
8.424  
8.065  
8.061  
8.050  
7.850  
7.824  
7.817  
7.236  
7.232  
7.221  
7.221  
7.221  
6.978  
6.976  
6.966  
6.955  
6.954

2.96  
1.99  
0.94  
0.98  
1.00

10.0 9.5 9.0 8.5 8.0 7.5 7.0 6.5 6.0 5.5 5.0 4.5 4.0 3.5 3.0 2.5 2.0 1.5 1.0 0.5 0.0

f1 (ppm)

— 147.98  
— 137.68  
— 136.04  
— 134.83  
— 128.66  
— 124.55  
— 124.14  
— 122.40  
— 117.81  
— 115.64  
— 110.33  
— 109.95

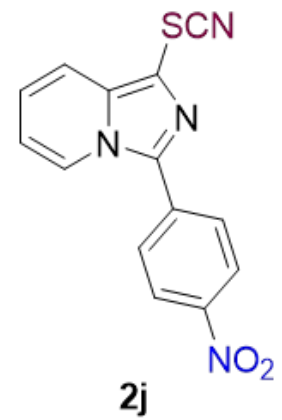

$^{13}\text{C}$  NMR ( $\text{CDCl}_3$ , 150 MHz)

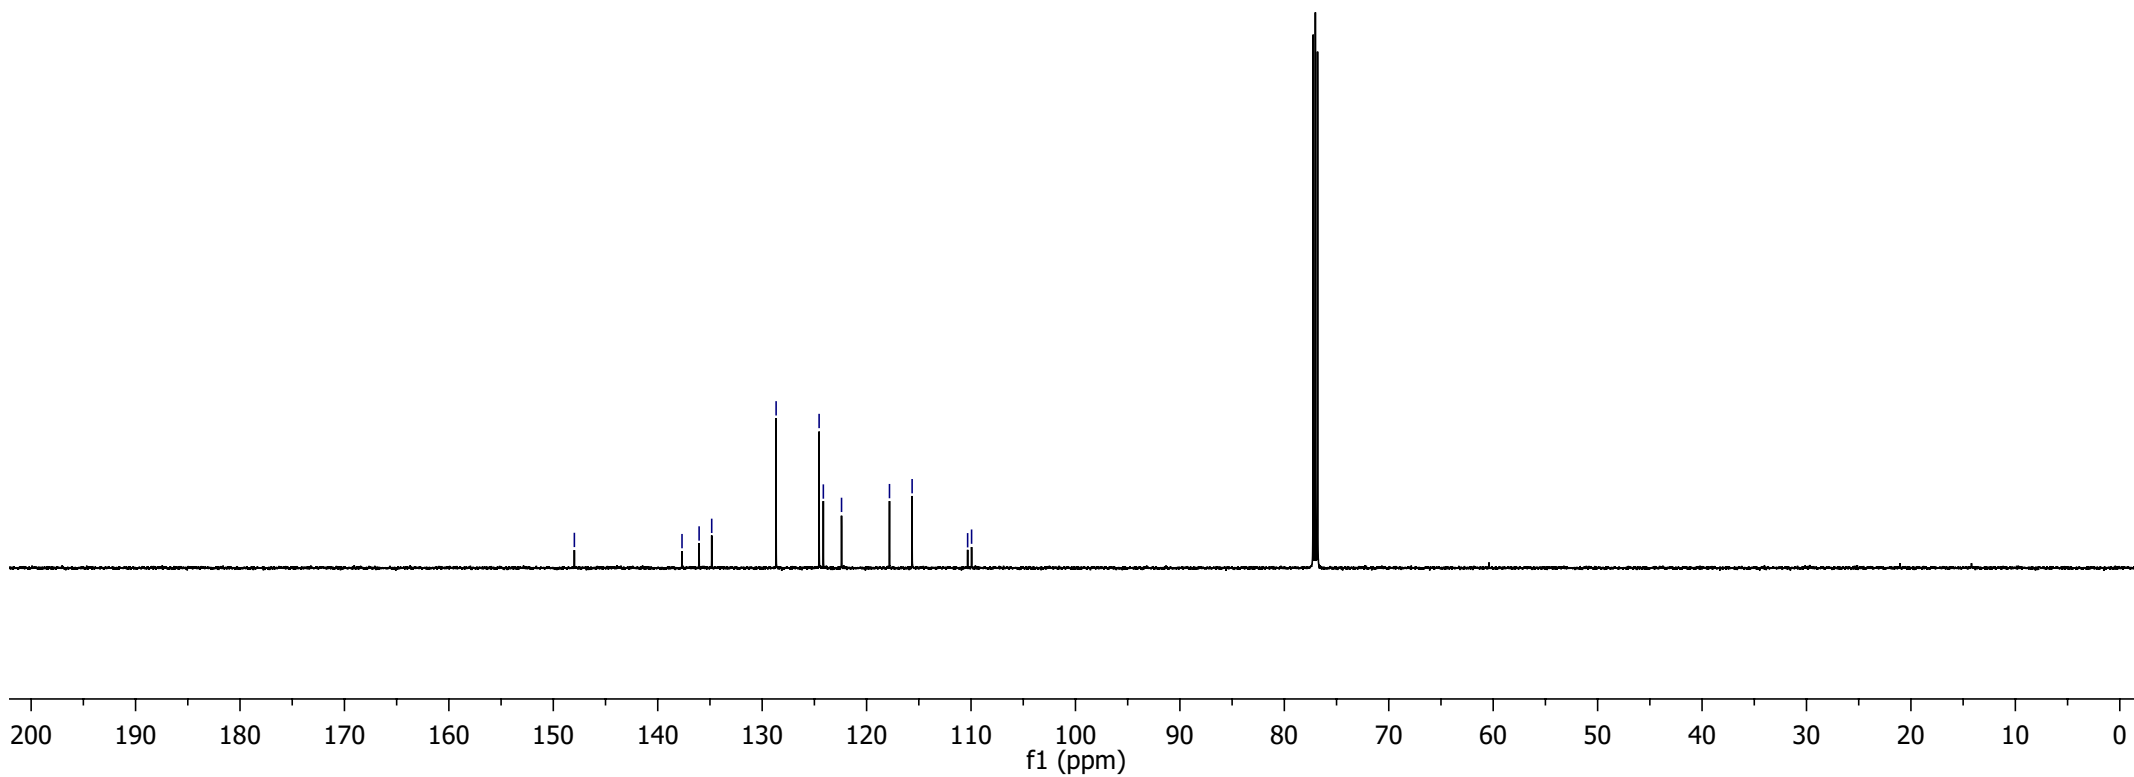

8.344  
8.342  
8.340  
8.330  
8.328  
8.326  
8.121  
8.119  
8.116  
8.091  
8.088  
8.085  
8.075  
8.073  
8.072  
8.069  
7.812  
7.794  
7.715  
7.713  
7.212  
7.200  
7.198  
7.195  
7.193  
7.182  
7.180  
6.943  
6.940  
6.928  
6.915  
6.913

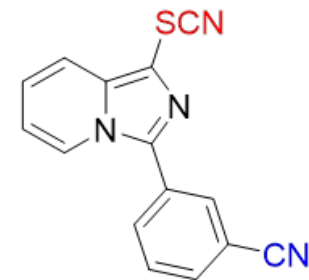

2k

$^1\text{H NMR}$  ( $\text{CDCl}_3$ , 500 MHz)

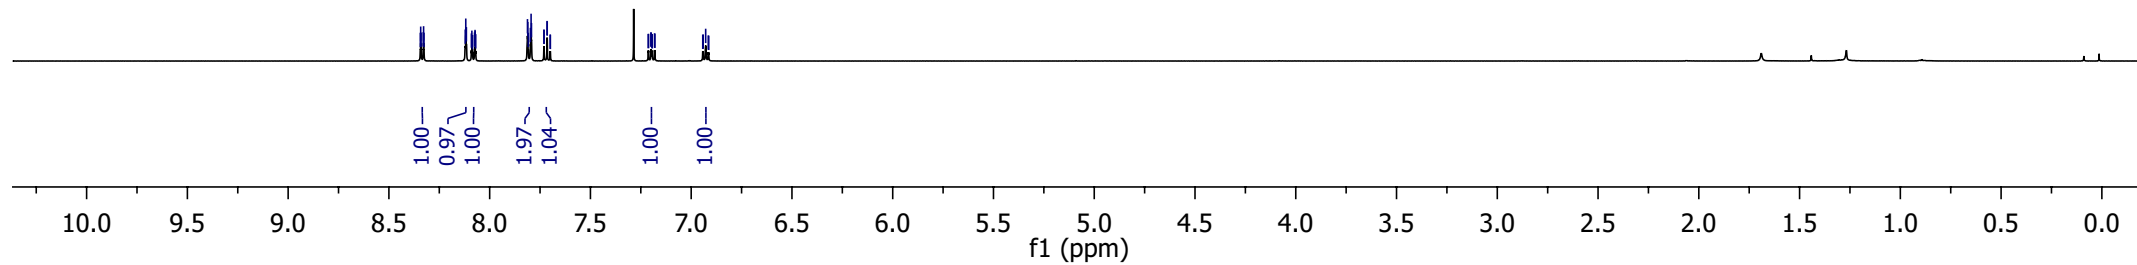

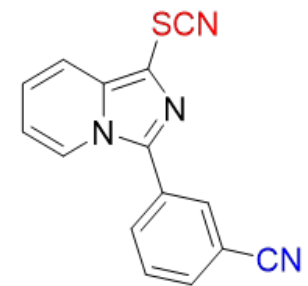

2k

$^{13}\text{C}$  NMR ( $\text{CDCl}_3$ , 125 MHz)

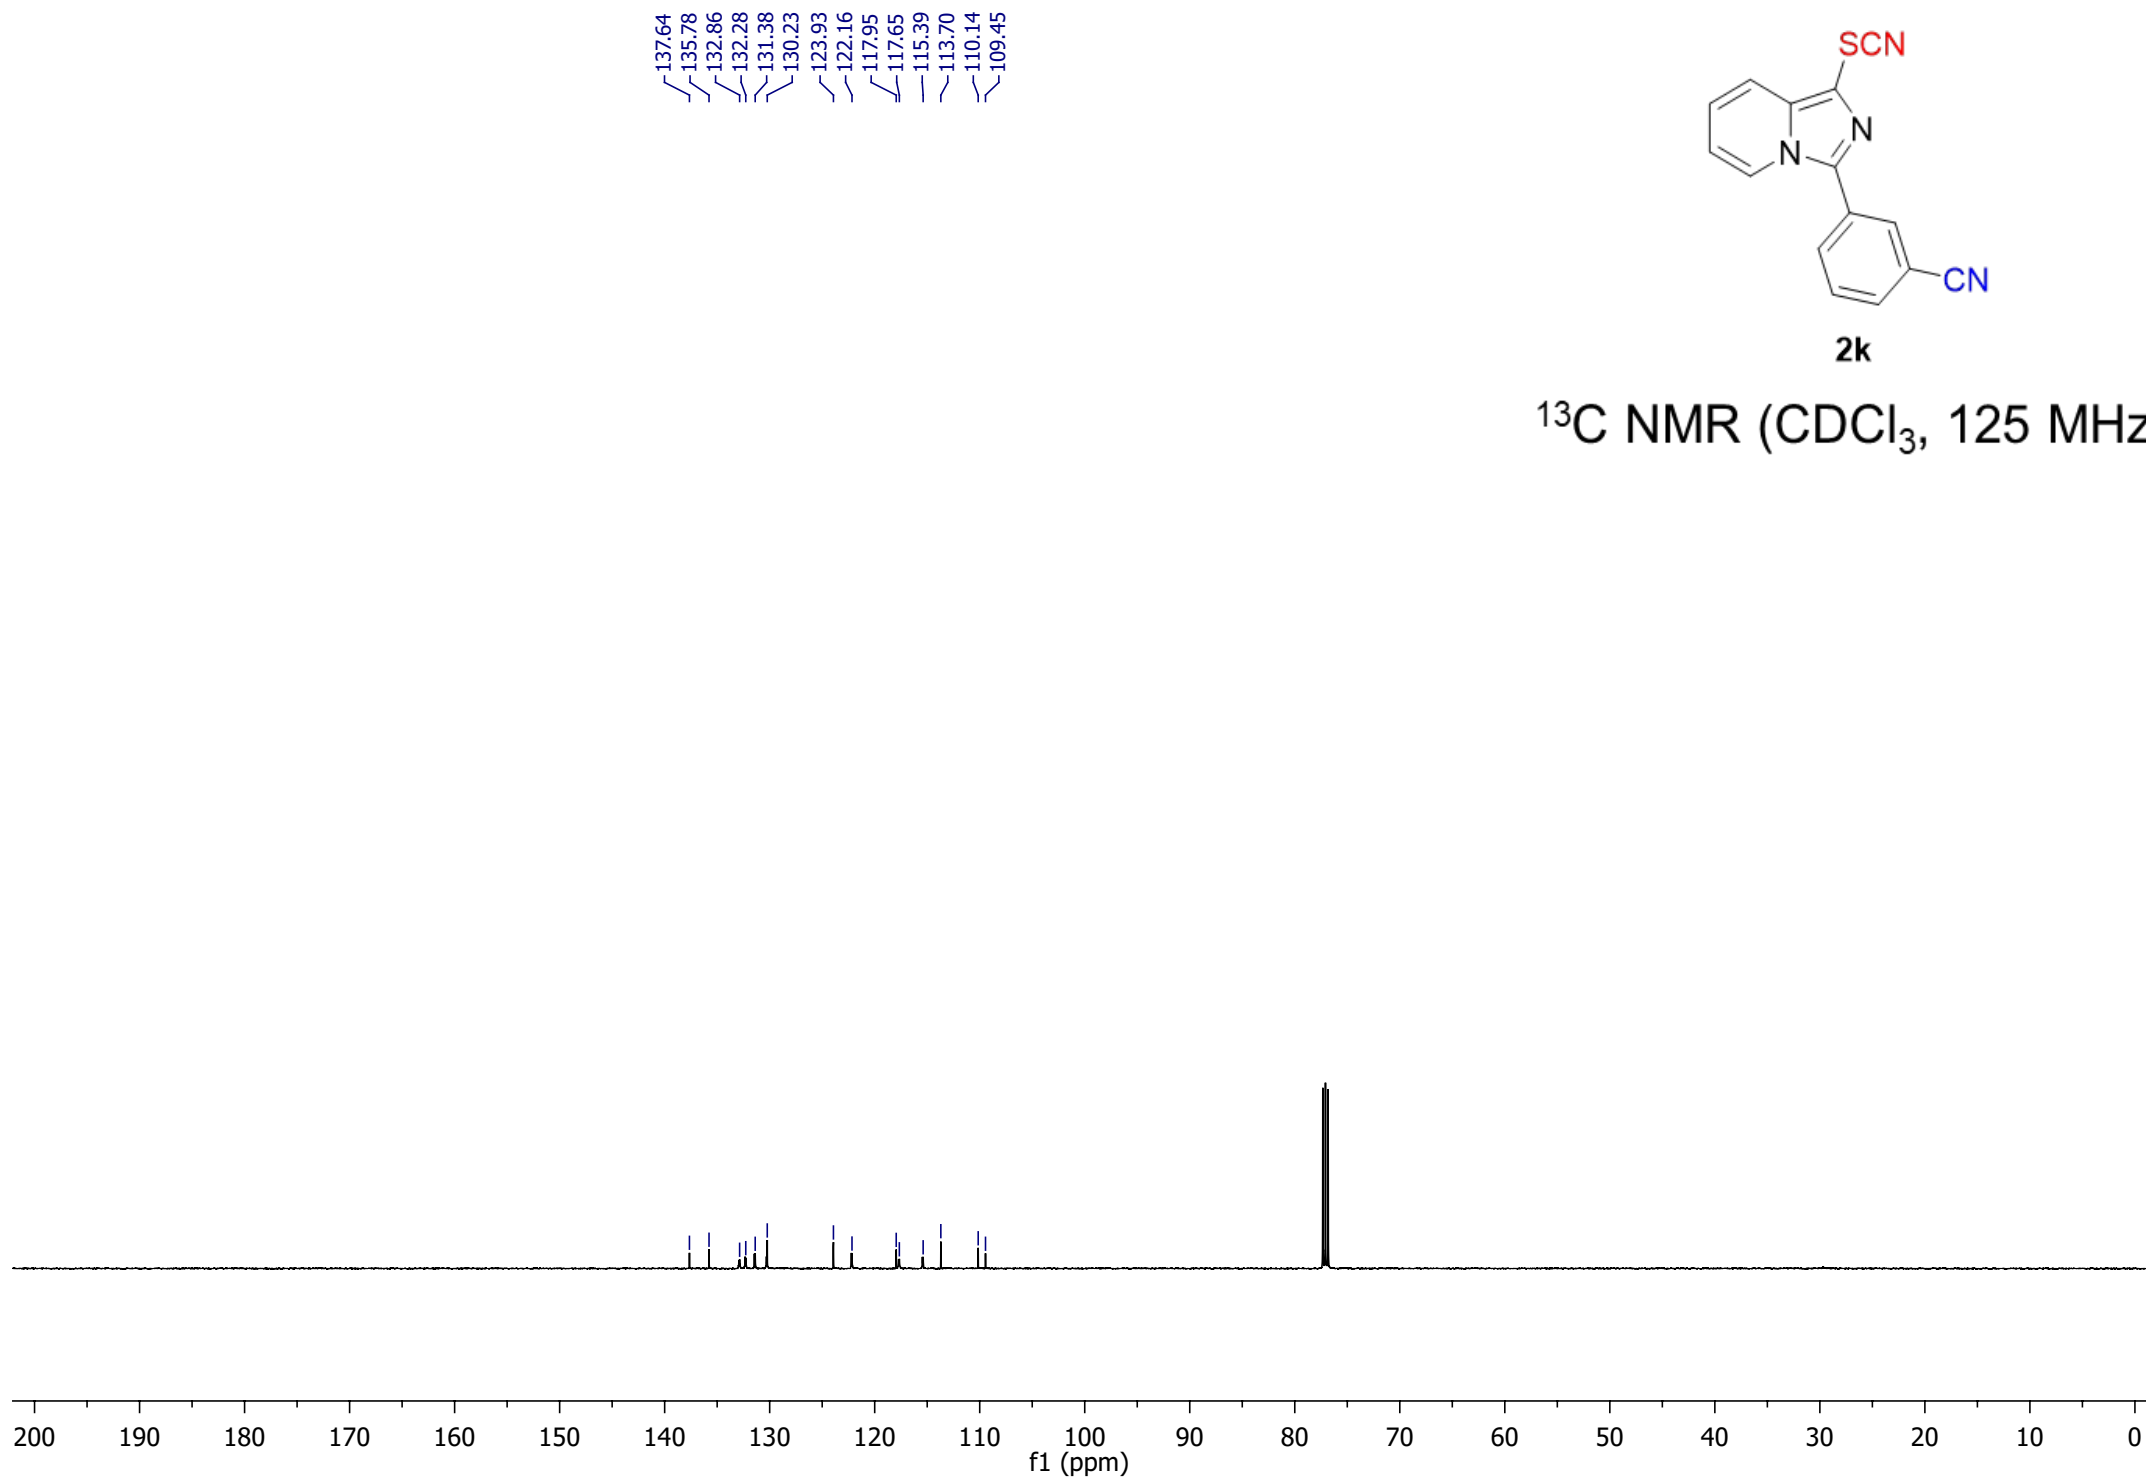

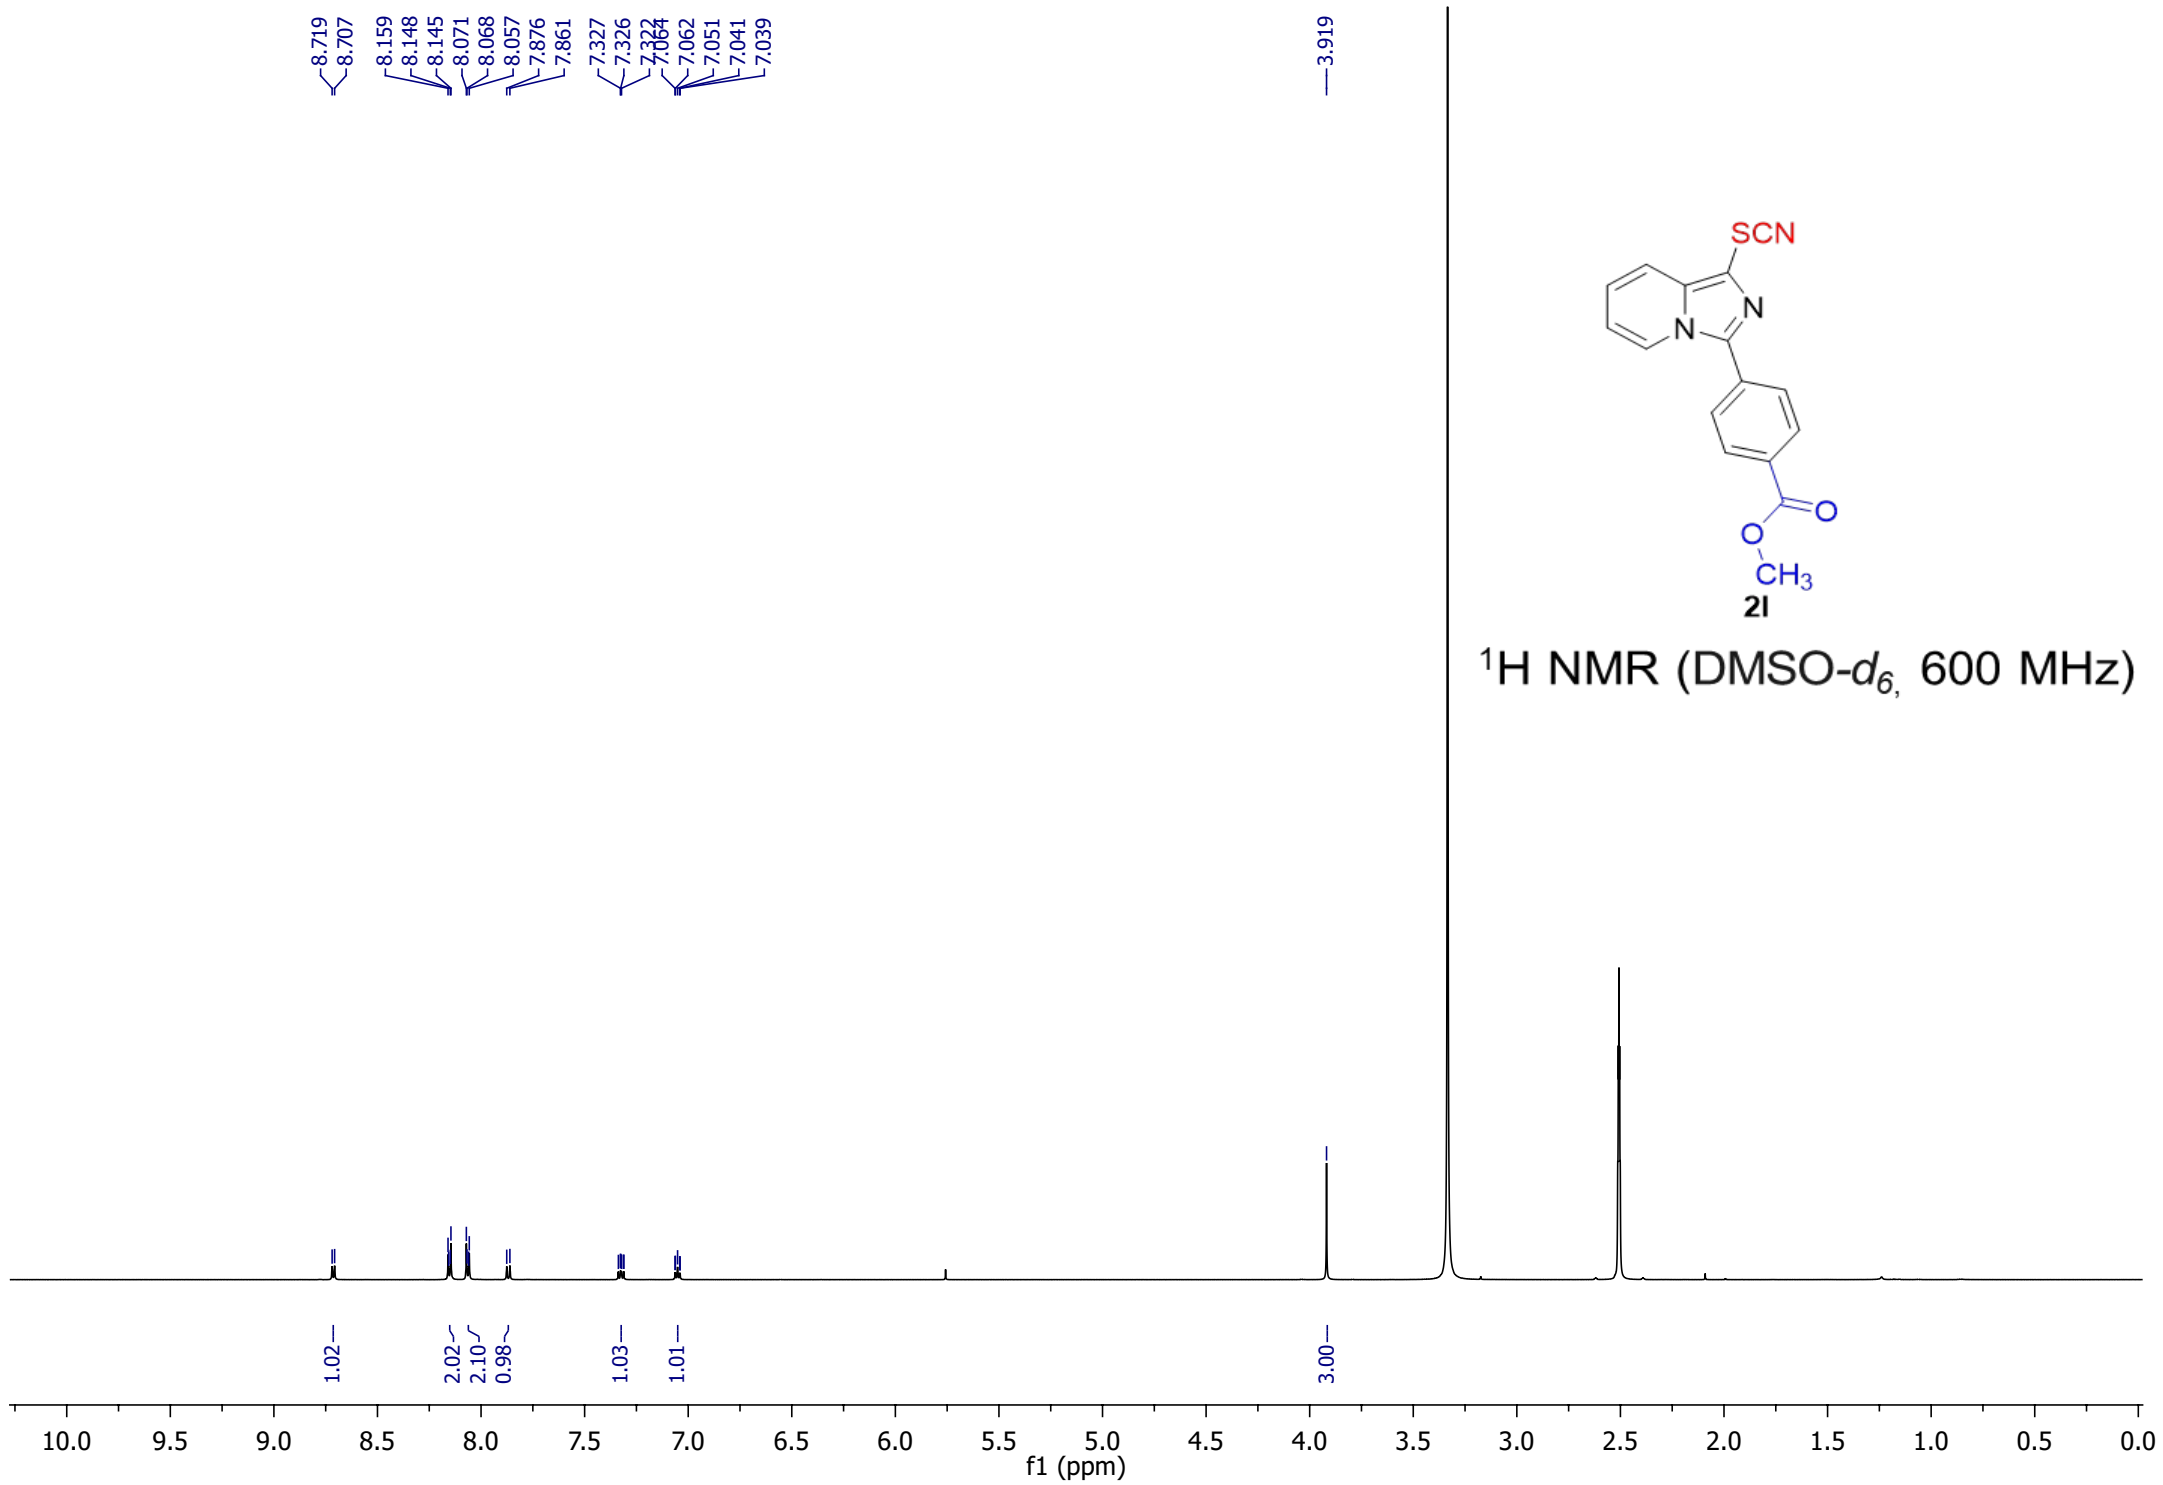

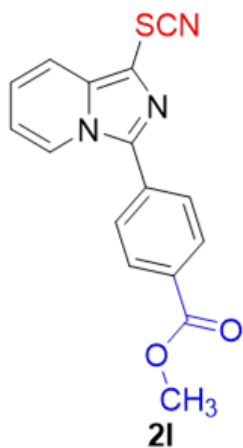

$^{13}\text{C}$  NMR (DMSO- $d_6$ , 150 MHz)

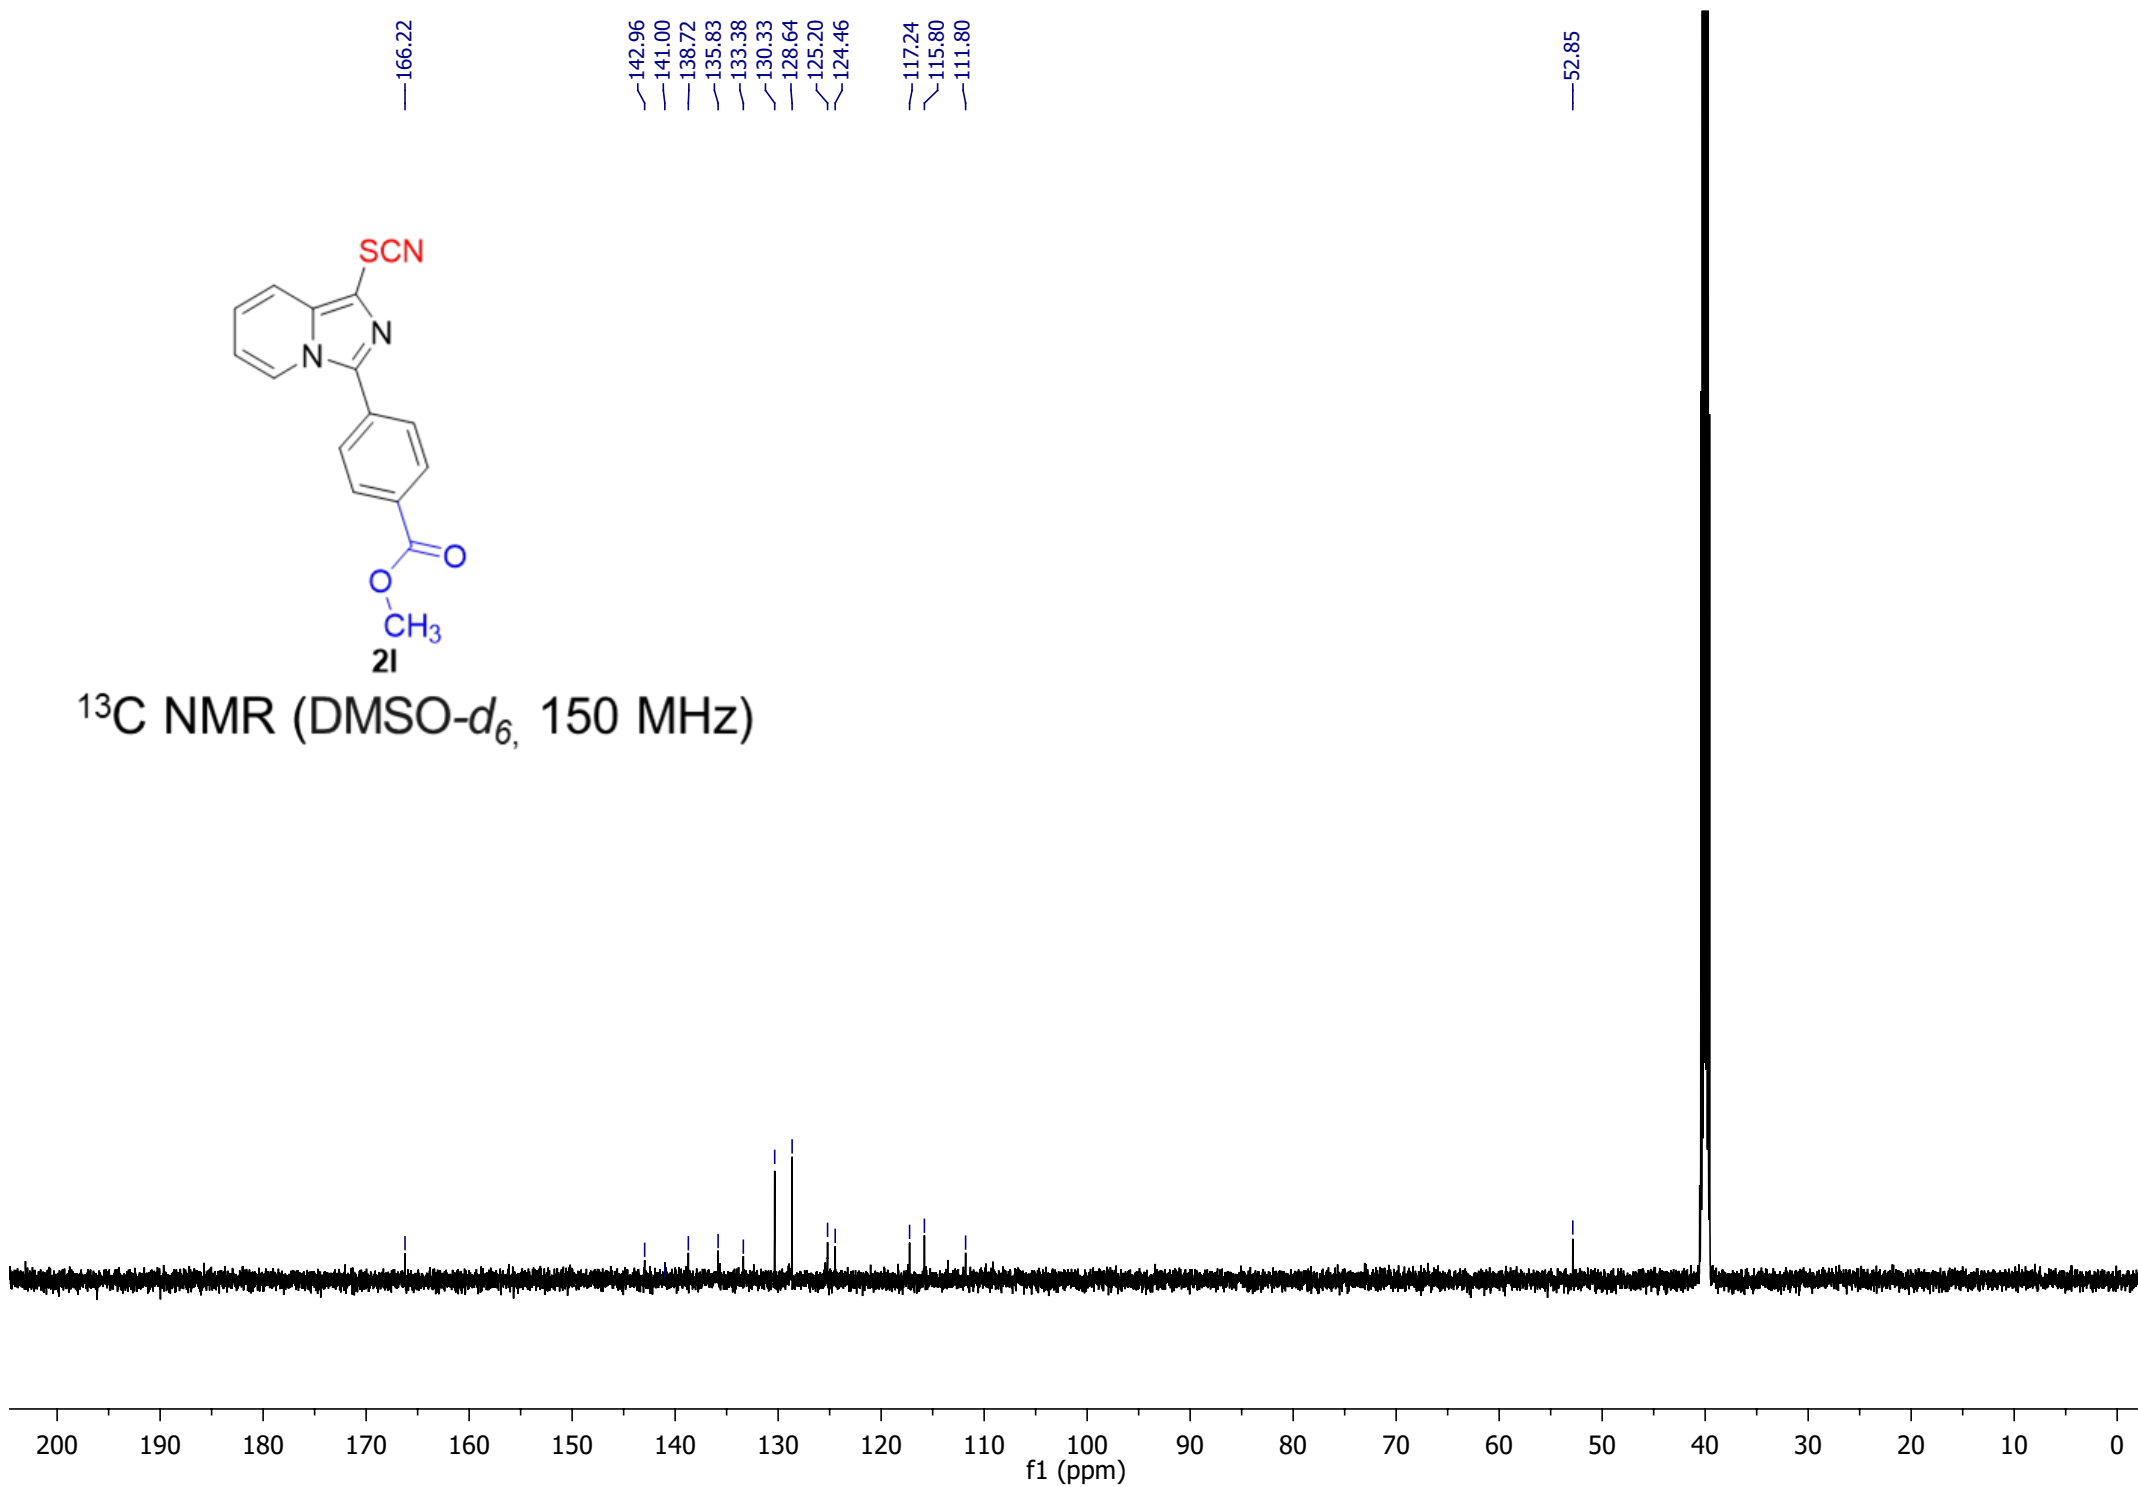



8.313  
8.301  
8.067  
8.053  
7.972  
7.958  
7.736  
7.721  
7.131  
7.120  
7.116  
7.105  
6.855  
6.853  
6.843  
6.832  
6.831

3.058

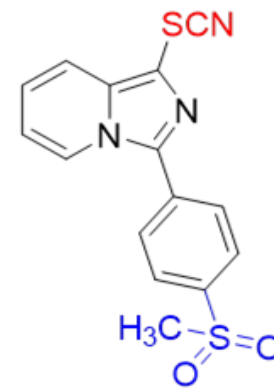

2m  
<sup>1</sup>H NMR (CDCl<sub>3</sub>, 600 MHz)

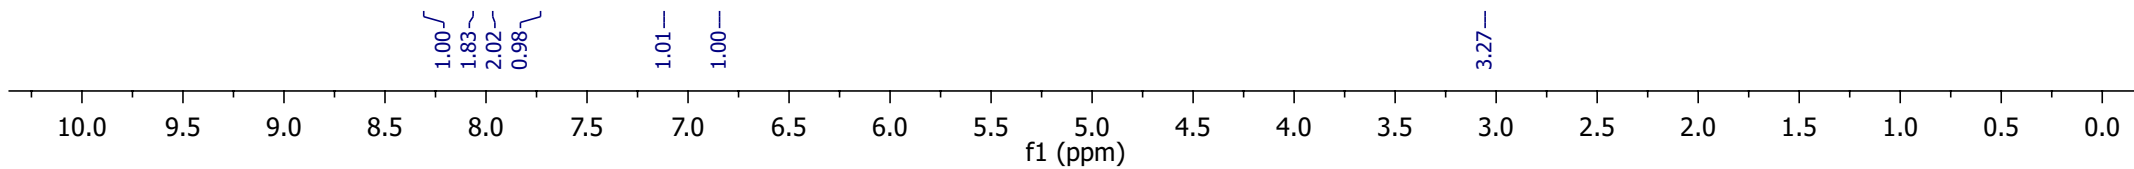

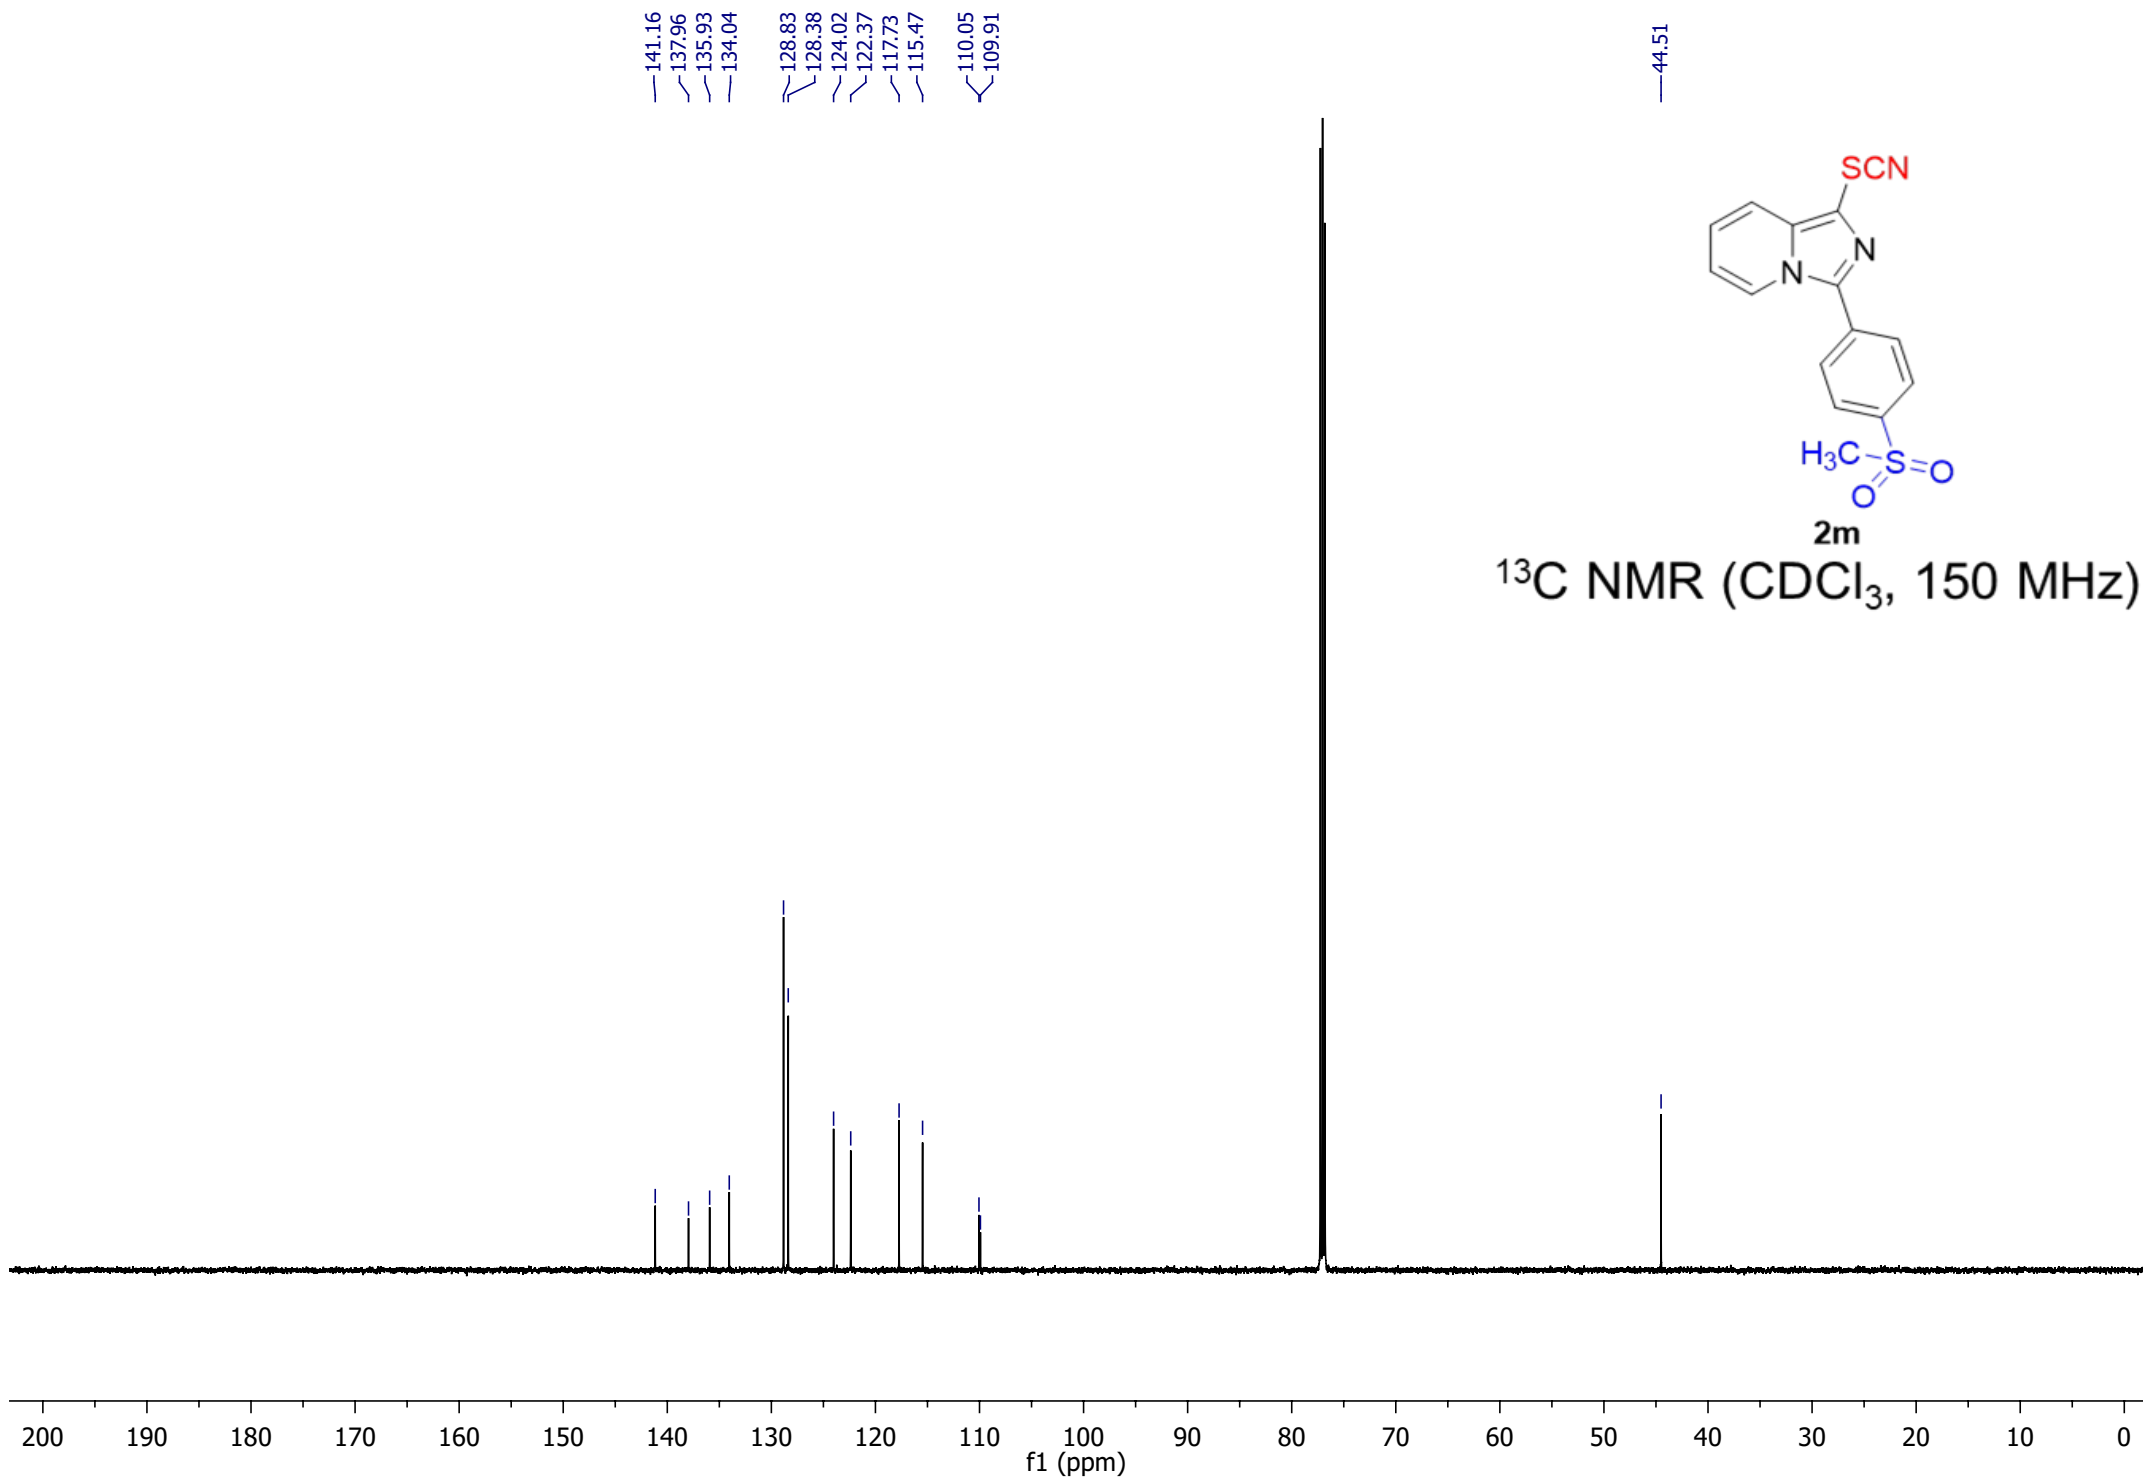

8.024  
8.011  
7.948  
7.935  
7.762  
7.747  
7.724  
7.710  
7.698  
7.629  
7.615  
7.603  
7.590  
7.578  
7.545  
7.533  
7.521  
7.479  
7.467  
7.454

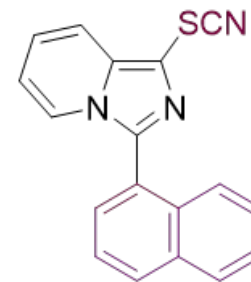

2n

$^1\text{H}$  NMR ( $\text{CDCl}_3$ , 600 MHz)

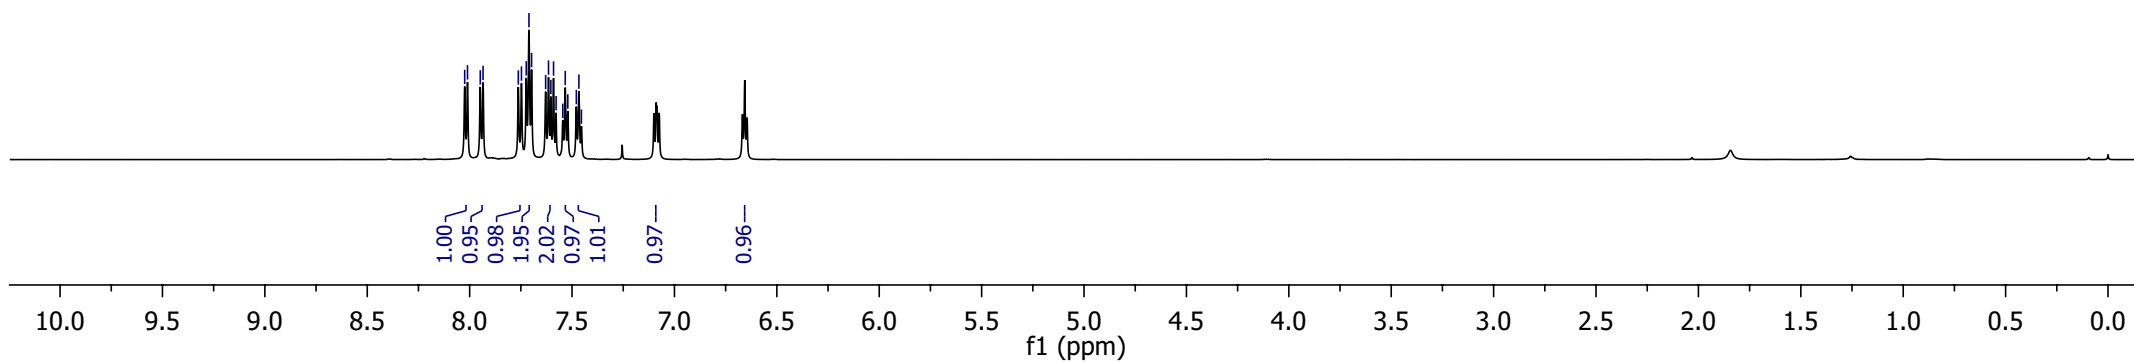

138.98  
135.09  
133.92  
131.55  
130.82  
129.02  
128.78  
127.51  
126.68  
125.60  
125.32  
125.00  
123.54  
123.10  
117.11  
114.16  
110.72  
107.74

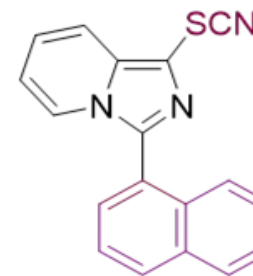

2n

$^{13}\text{C}$  NMR ( $\text{CDCl}_3$ , 150 MHz)

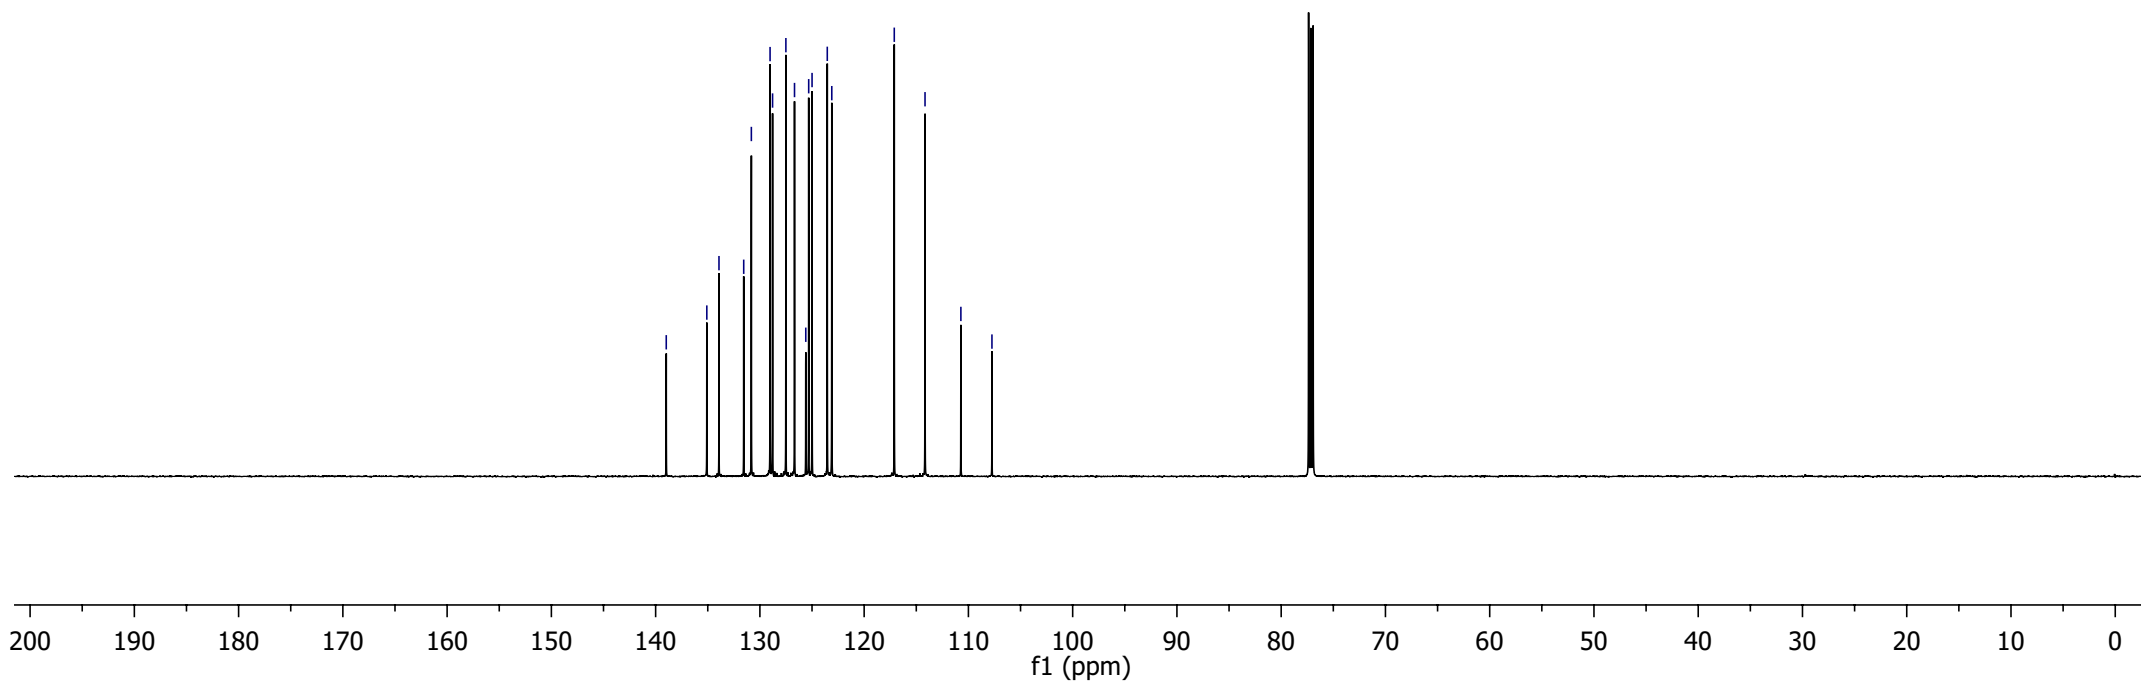

8.776  
8.764

7.710  
7.695  
7.610  
7.608  
7.120  
7.109  
7.103  
7.094  
6.877  
6.866  
6.855  
6.622  
6.619  
6.617  
6.614

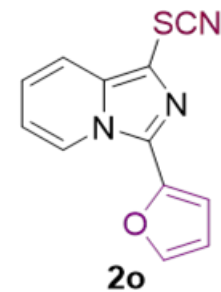

<sup>1</sup>H NMR (CDCl<sub>3</sub>, 600 MHz)

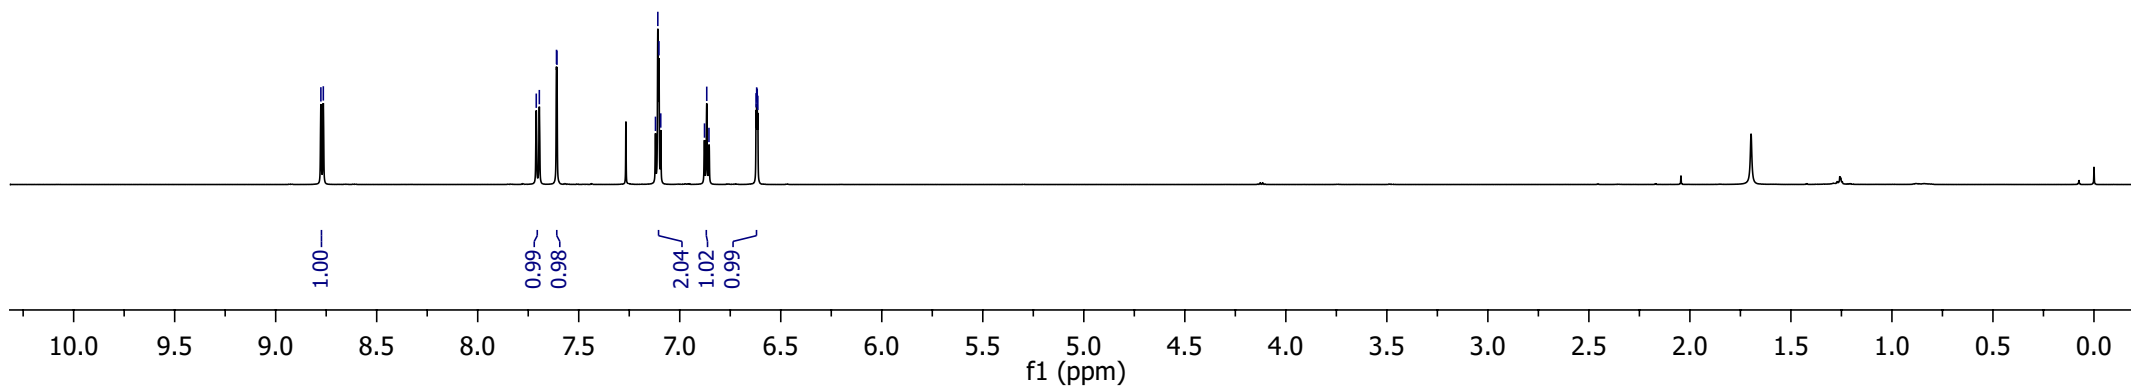

144.99  
142.90  
134.82  
132.22  
124.30  
123.51  
117.12  
114.89  
112.05  
110.24  
108.51

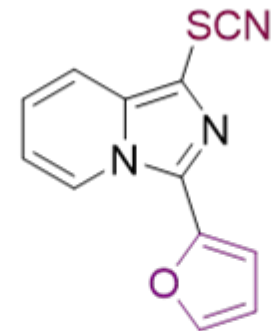

2o

<sup>13</sup>C NMR (CDCl<sub>3</sub>, 150 MHz)

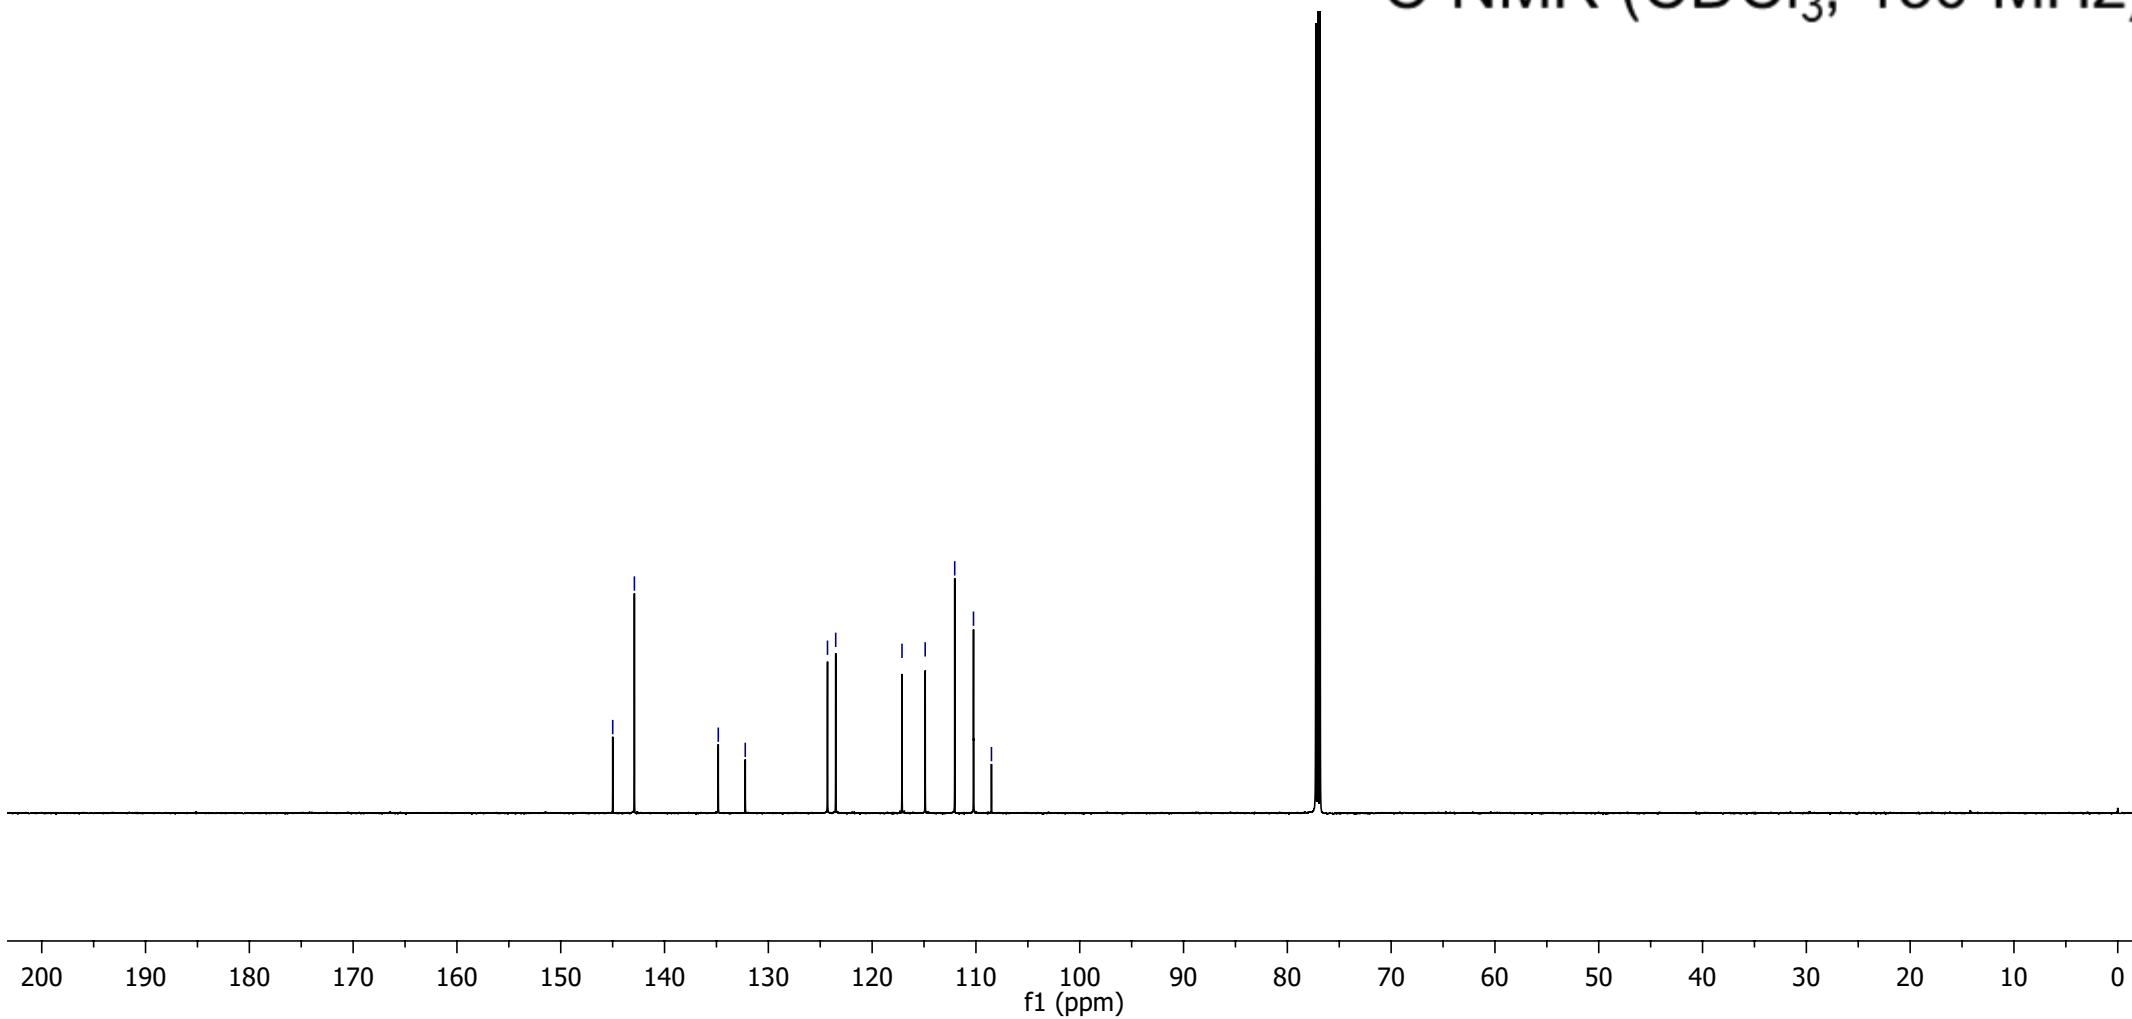

8.356  
8.344  
7.755  
7.739  
7.307  
7.300  
7.169  
7.162  
7.150  
7.139  
7.135  
7.124  
6.912  
6.900  
6.889

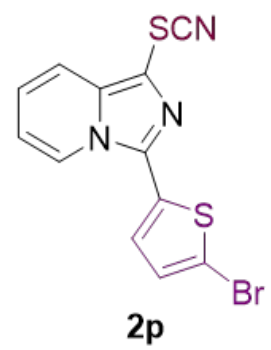

<sup>1</sup>H NMR (CDCl<sub>3</sub>, 600 MHz)

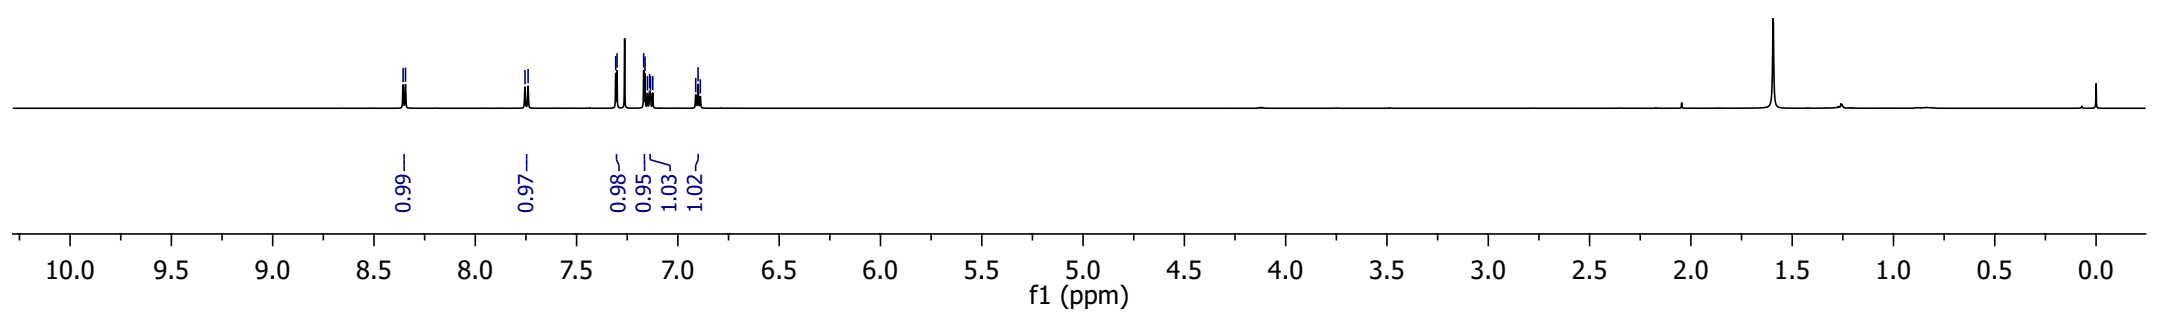

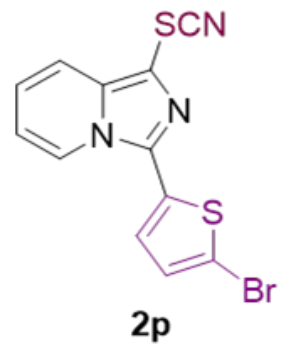

$^{13}\text{C}$  NMR ( $\text{CDCl}_3$ , 150 MHz)

135.40  
133.75  
132.00  
130.67  
126.60  
123.52  
122.74  
117.56  
115.26  
114.86  
110.11  
108.99

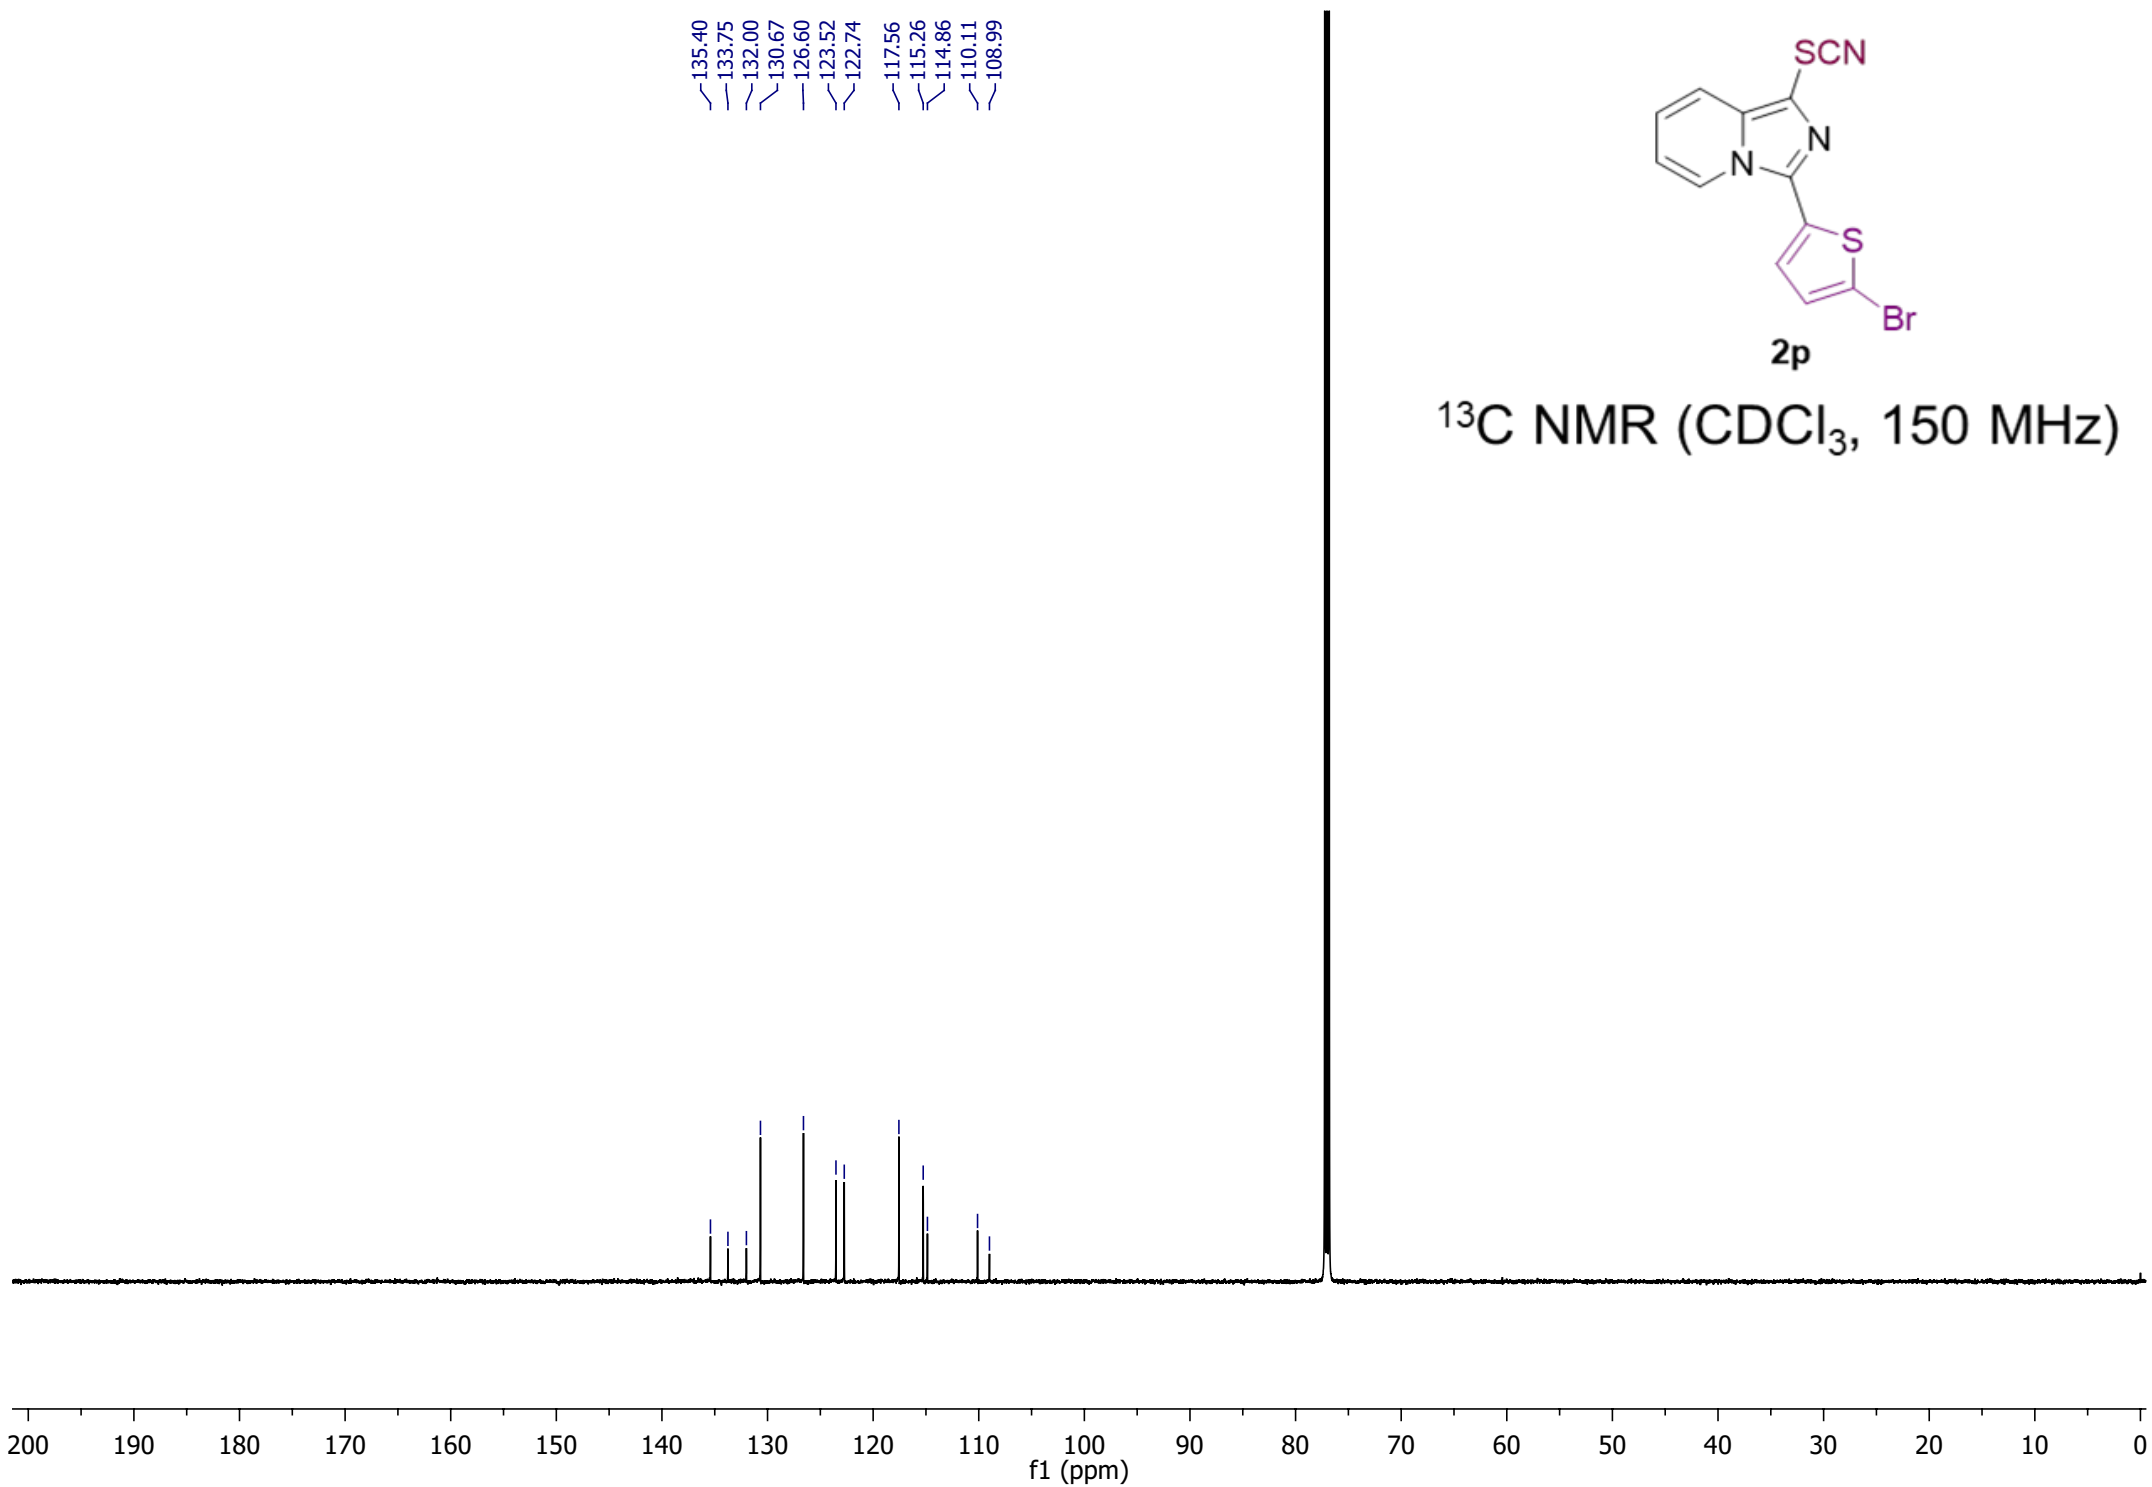



9.077  
8.768  
8.760  
8.338  
8.324  
8.157  
8.145  
8.141  
7.801  
7.782  
7.535  
7.529  
7.189  
7.188  
7.176  
7.175  
7.171  
7.170  
7.158  
7.157  
6.905  
6.903  
6.890  
6.878  
6.876

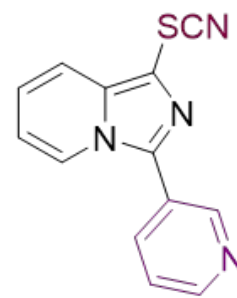

2q

$^1\text{H}$  NMR ( $\text{CDCl}_3$ , 500 MHz)

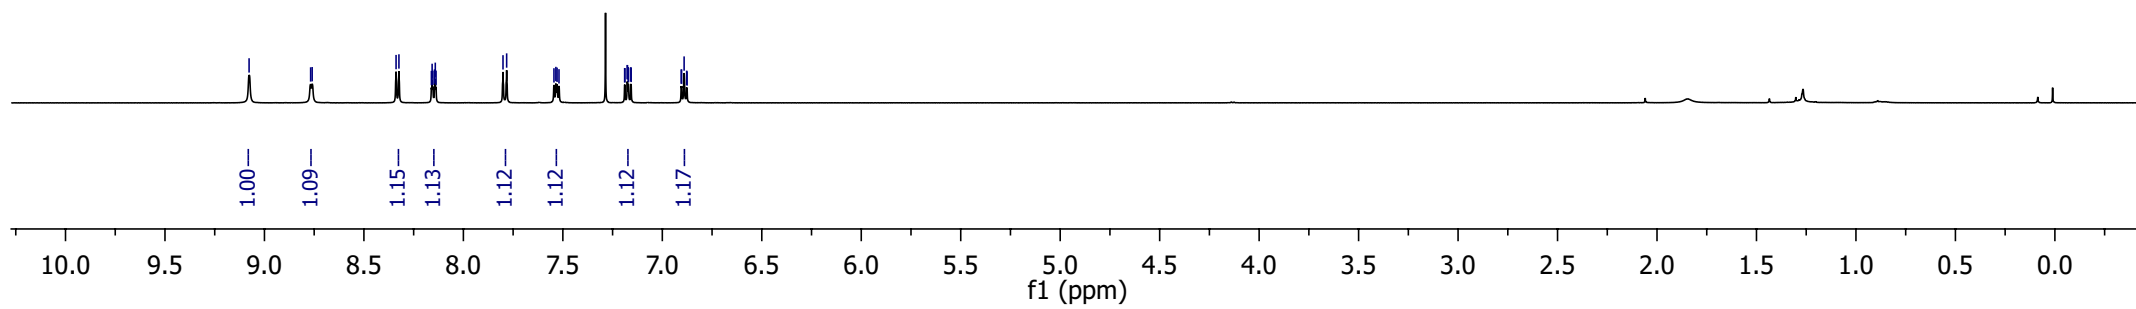

150.60  
148.70  
137.19  
136.00  
135.72  
125.32  
124.06  
123.78  
122.25  
117.63  
115.21  
110.25  
109.26

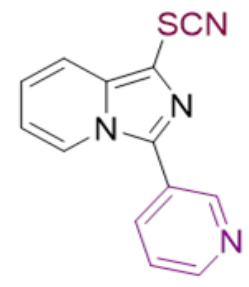

2q

<sup>13</sup>C NMR (CDCl<sub>3</sub>, 125 MHz)

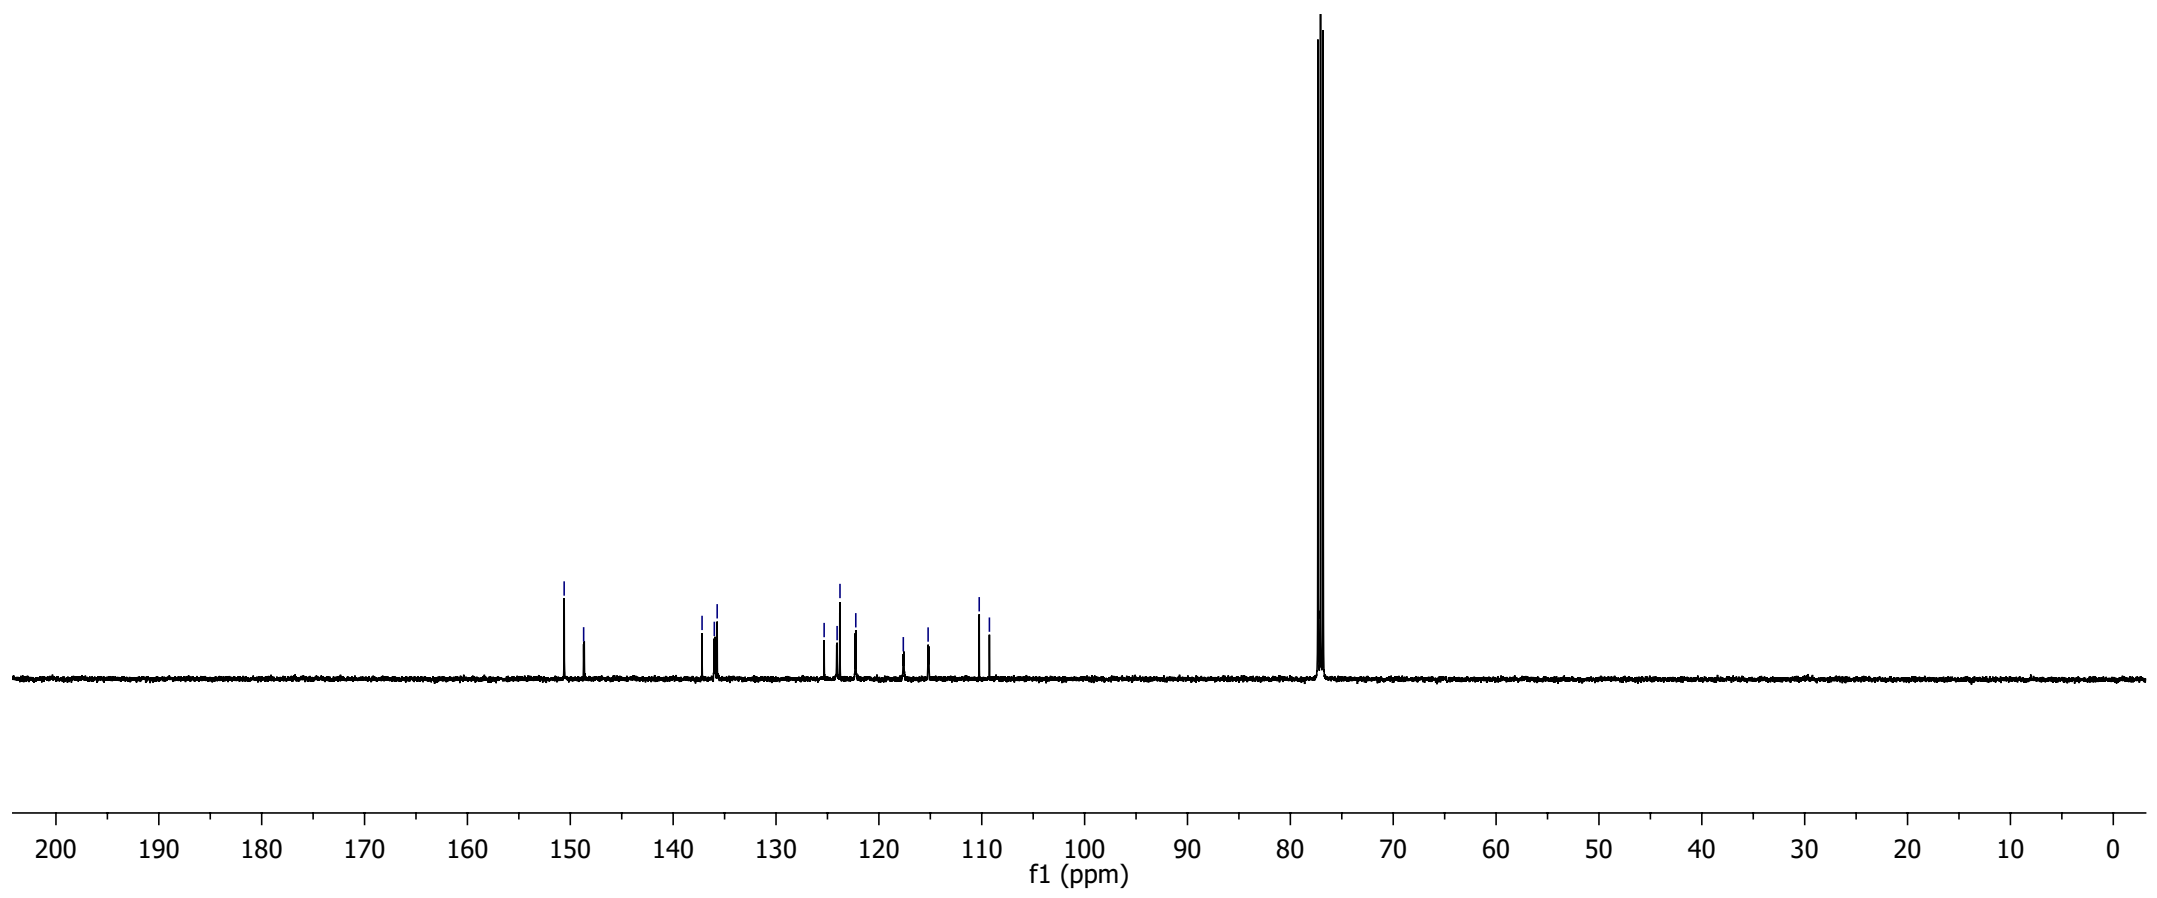

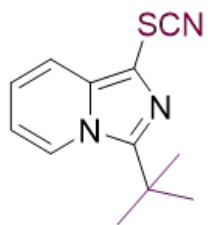

2r

$^1\text{H}$  NMR ( $\text{CDCl}_3$ , 500 MHz)

8.193  
8.178  
7.686  
7.668  
7.041  
7.040  
7.028  
7.027  
7.023  
7.021  
7.010  
7.009  
6.762  
6.760  
6.747  
6.735  
6.732

1.572

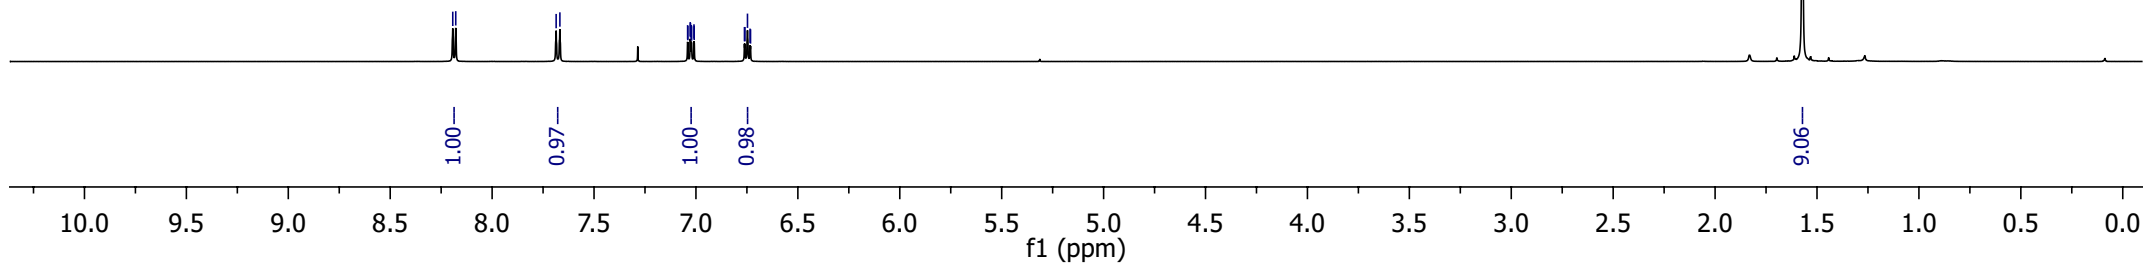

—147.47  
—135.88  
—124.17  
—122.04  
—117.55  
—113.17  
—111.00  
—105.01

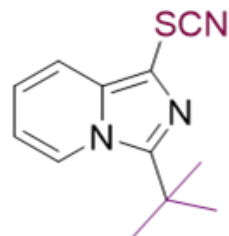

2r

$^{13}\text{C}$  NMR ( $\text{CDCl}_3$ , 125 MHz)

—33.82  
—28.05

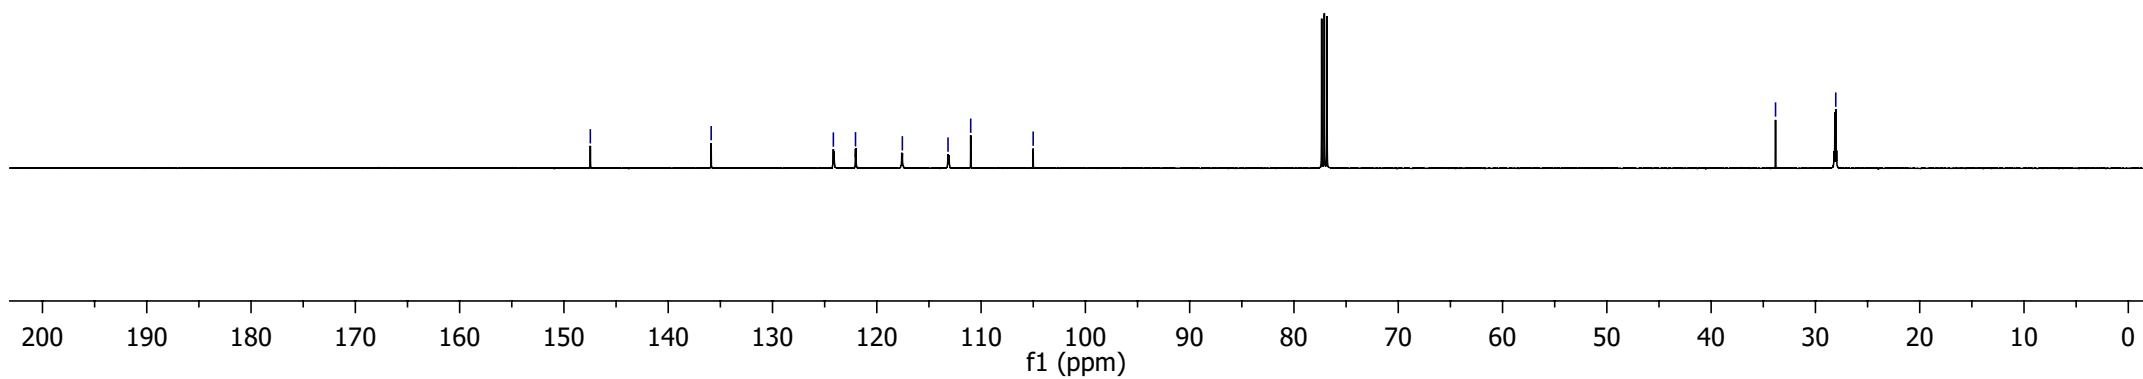

8.481  
8.479  
8.477  
8.467  
8.465  
8.463  
8.091  
8.077  
7.558  
7.555  
7.543  
7.496  
7.464  
7.162  
7.151  
7.149  
7.137  
7.135

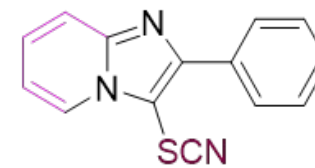

**3aa**

$^1\text{H NMR}$  ( $\text{CDCl}_3$ , 500 MHz)

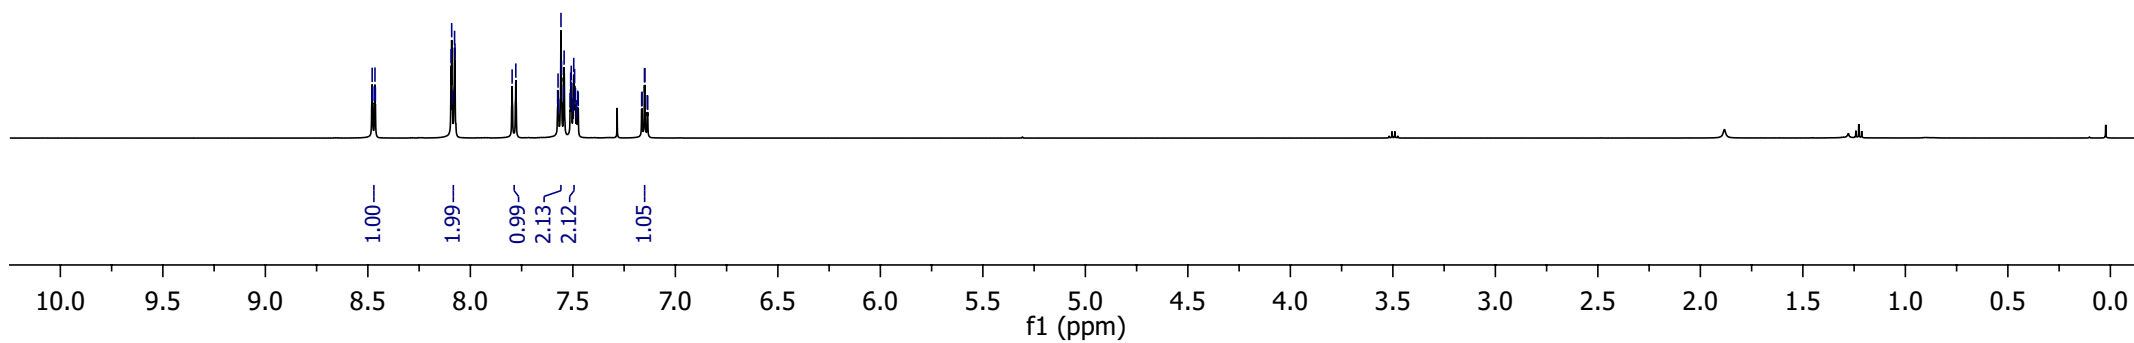

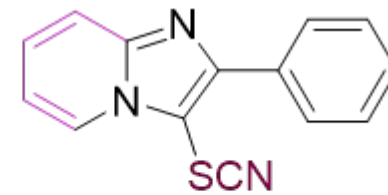

**3aa**

$^{13}\text{C}$  NMR ( $\text{CDCl}_3$ , 125 MHz)

—153.12  
—148.00  
—131.99  
—129.48  
—128.83  
—128.76  
—128.00  
—124.41  
—118.30  
—114.42  
—108.09  
—94.72

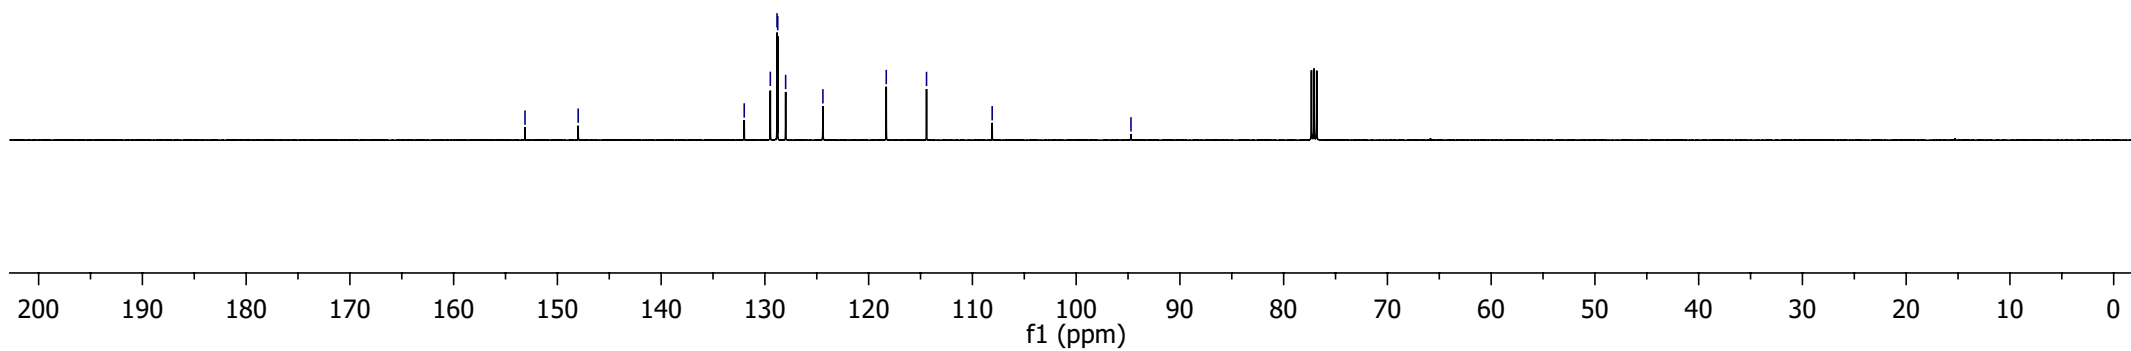

8.232  
8.224  
8.000  
7.997  
7.983  
7.982  
7.590  
7.581  
7.566  
7.562  
7.551  
7.538  
7.535  
7.481  
7.478  
7.476  
7.467  
7.464  
7.460  
7.451  
7.449  
7.446

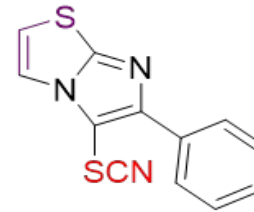

3ba

$^1\text{H}$  NMR (DMSO- $d_6$ , 500 MHz)

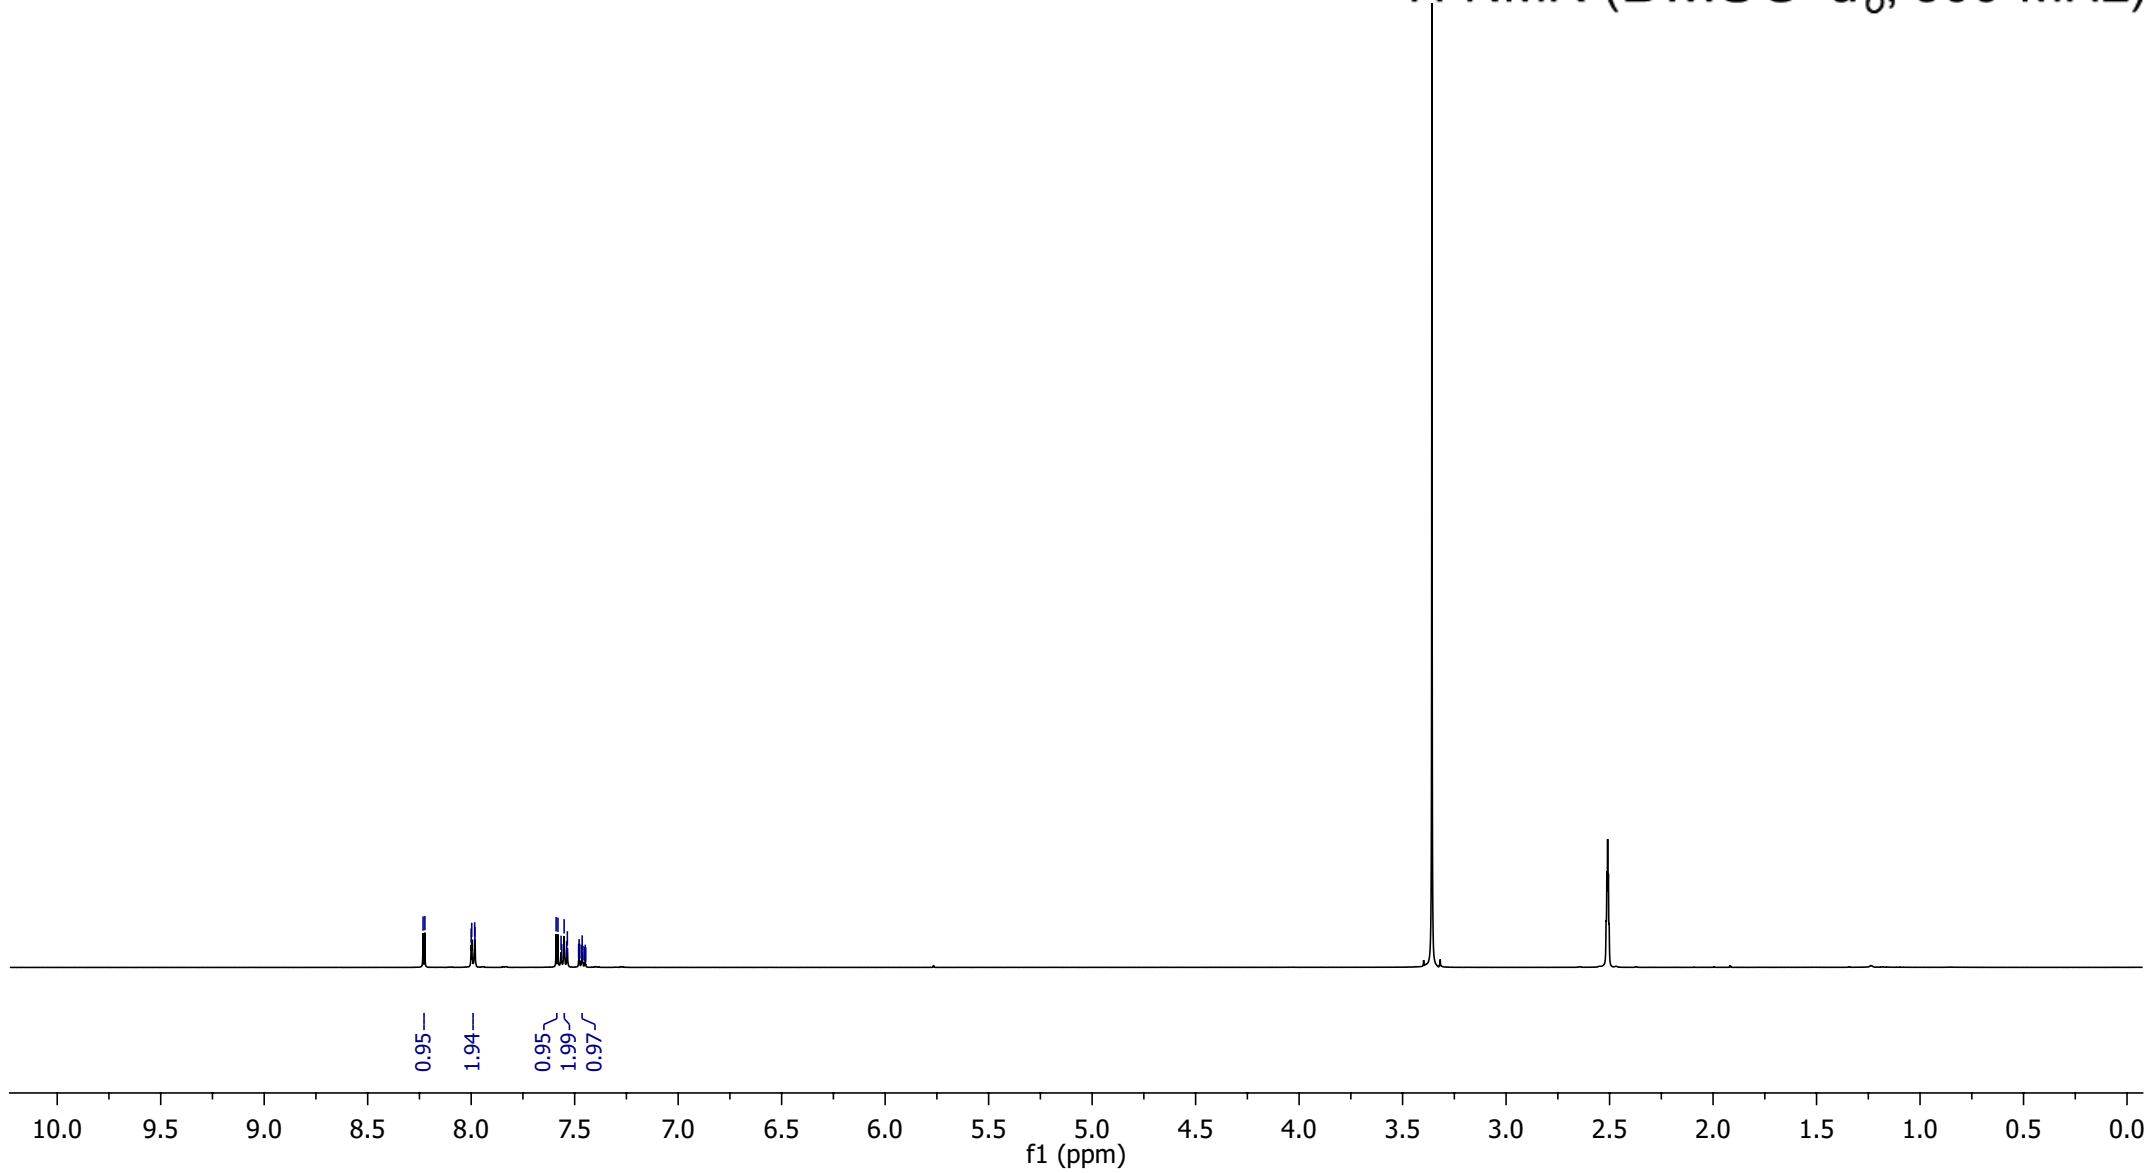

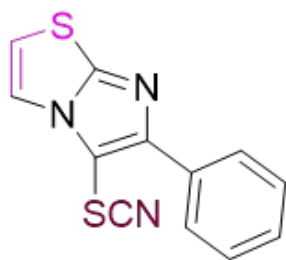

**3ba**

$^{13}\text{C}$  NMR ( $\text{CDCl}_3$ , 125 MHz)

152.70  
152.24

132.82  
129.27  
128.08  
127.94

119.68  
116.57

111.11

99.06

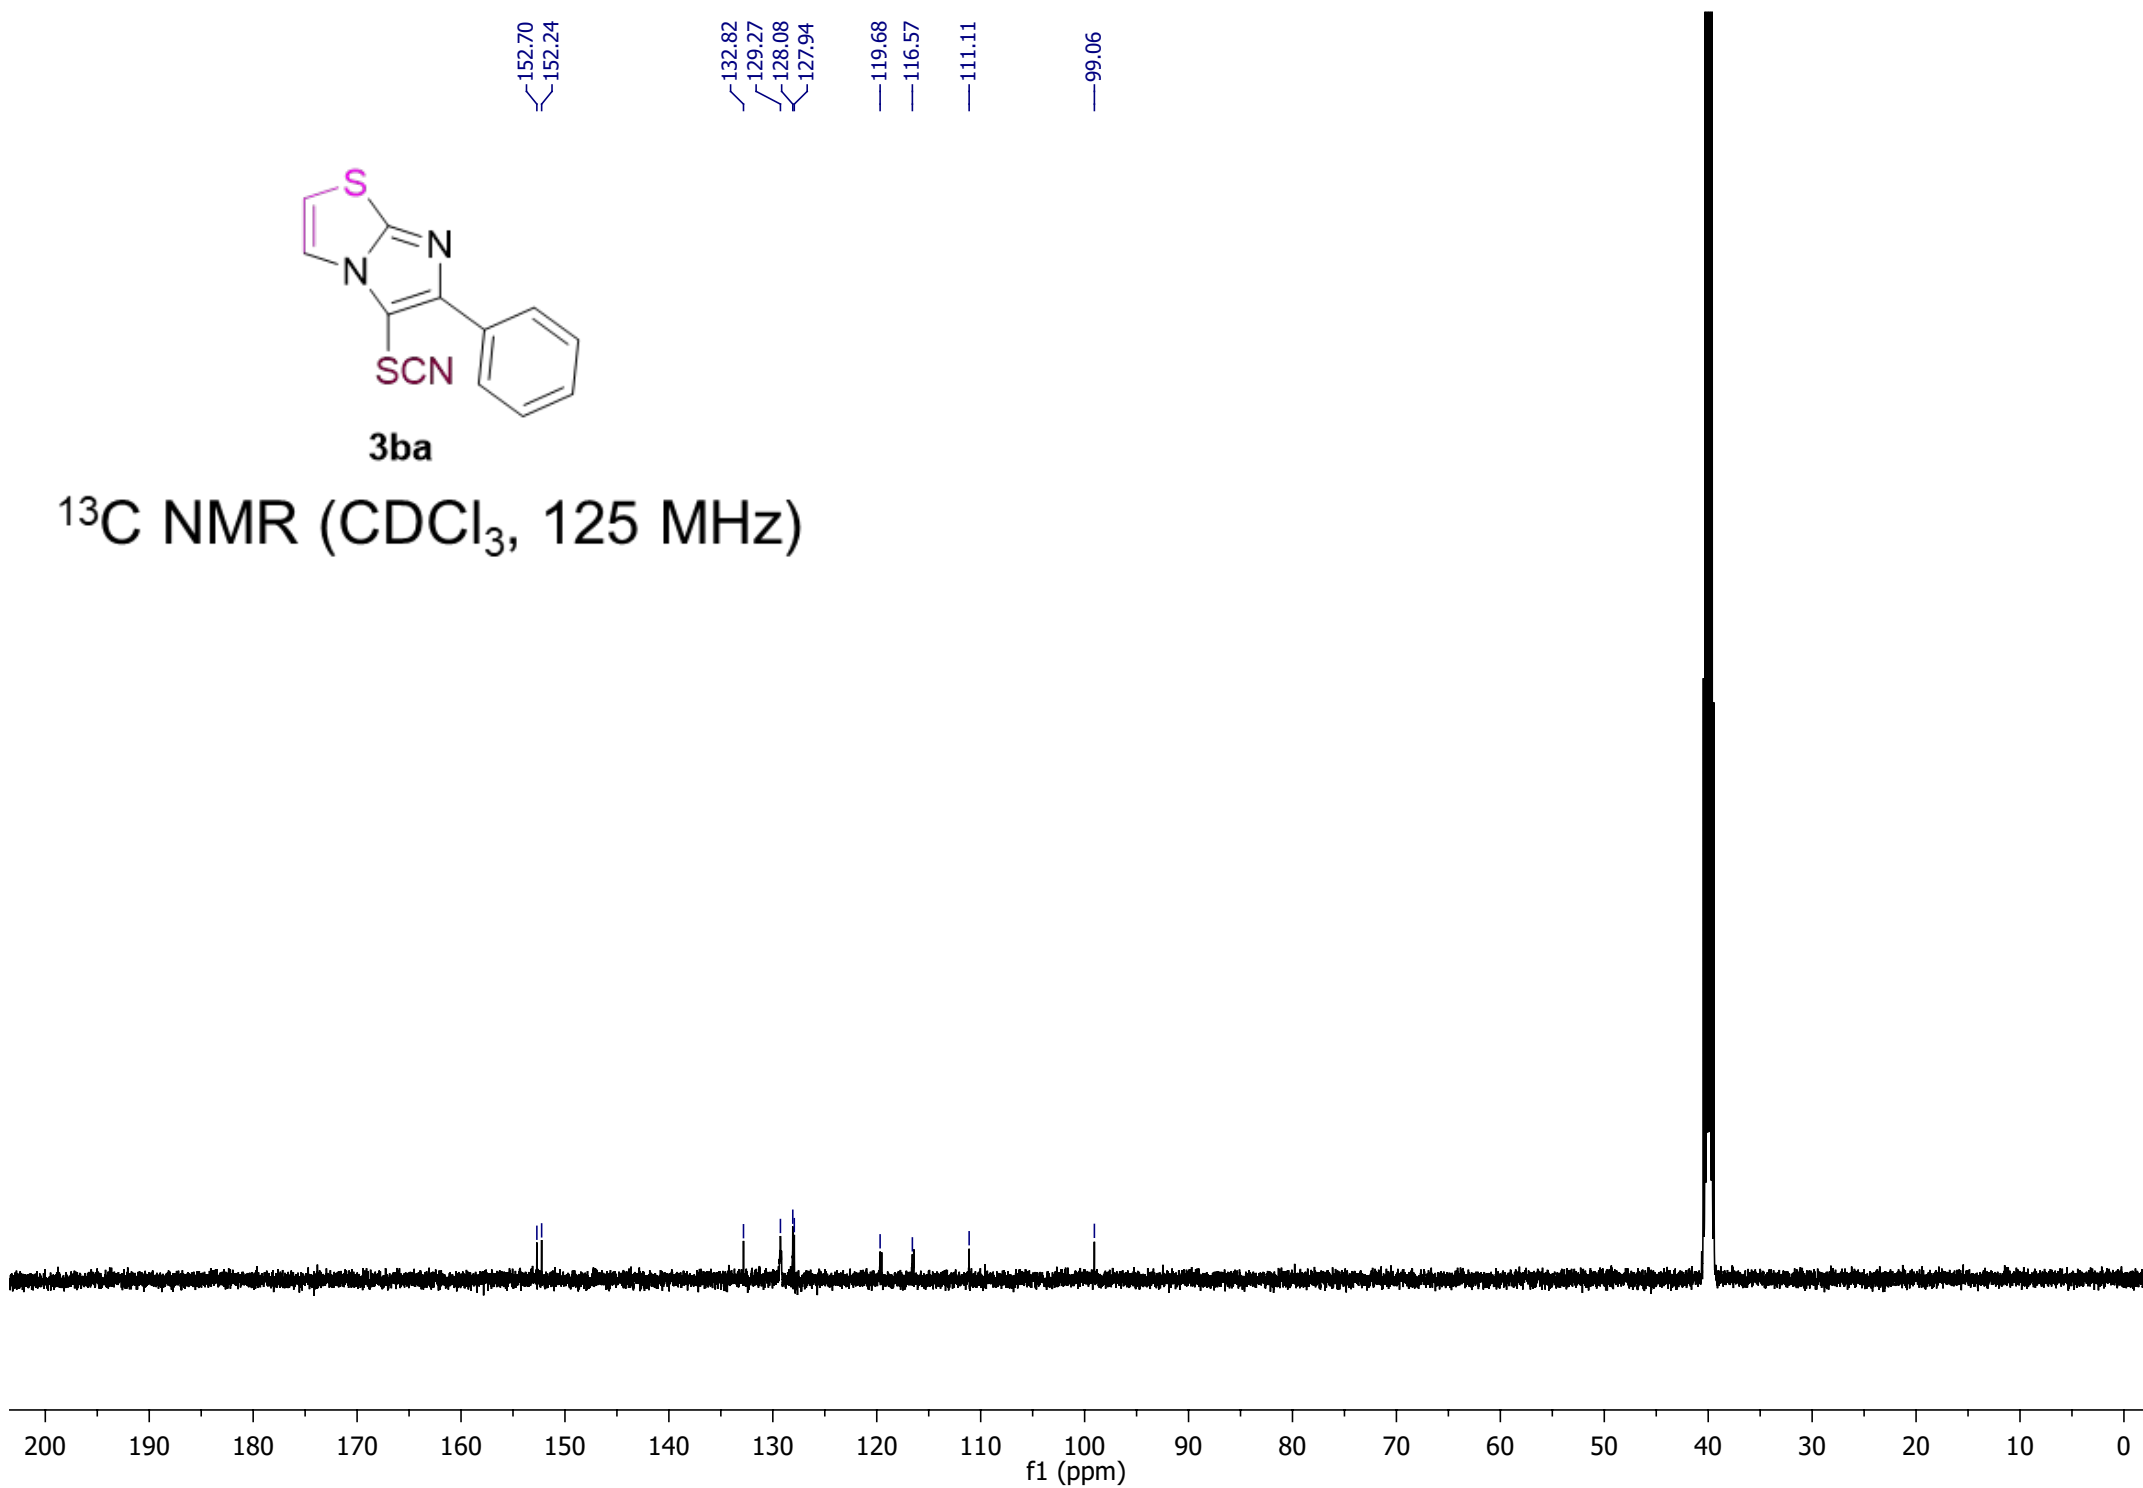



8.401  
8.383  
8.003  
8.001  
7.987  
7.558  
7.555  
7.544  
7.541  
7.529  
7.494  
7.492  
7.489  
7.477  
7.472  
7.464  
7.462  
7.460  
7.301  
7.296  
7.169  
7.164  
7.151  
7.146

3.931

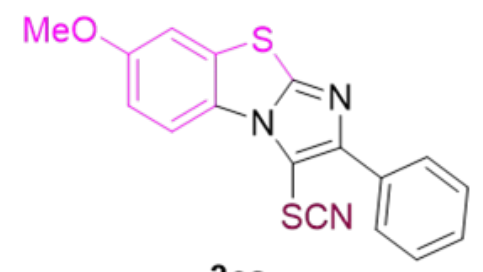

3ca

<sup>1</sup>H NMR (CDCl<sub>3</sub>, 500 MHz)

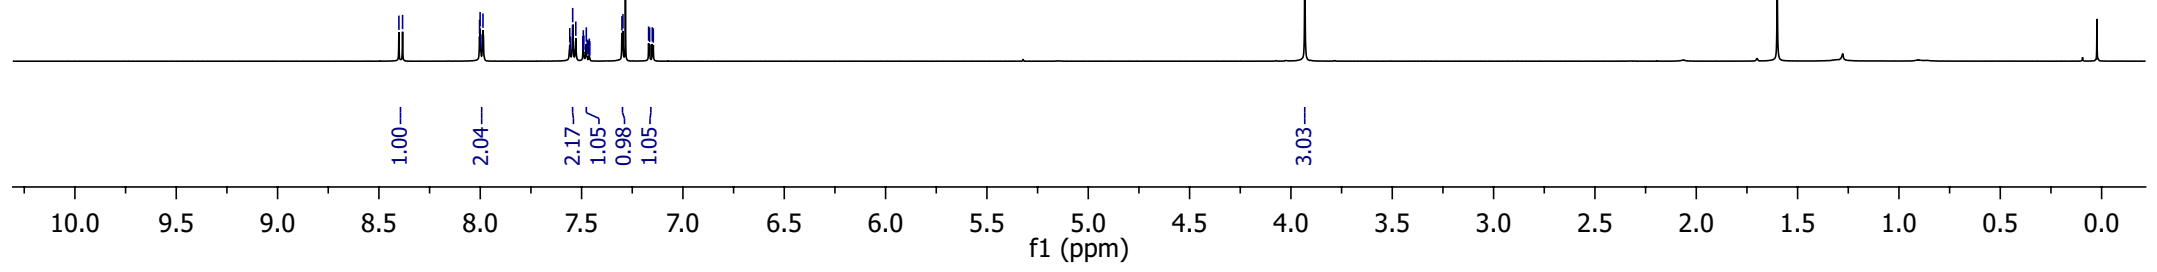

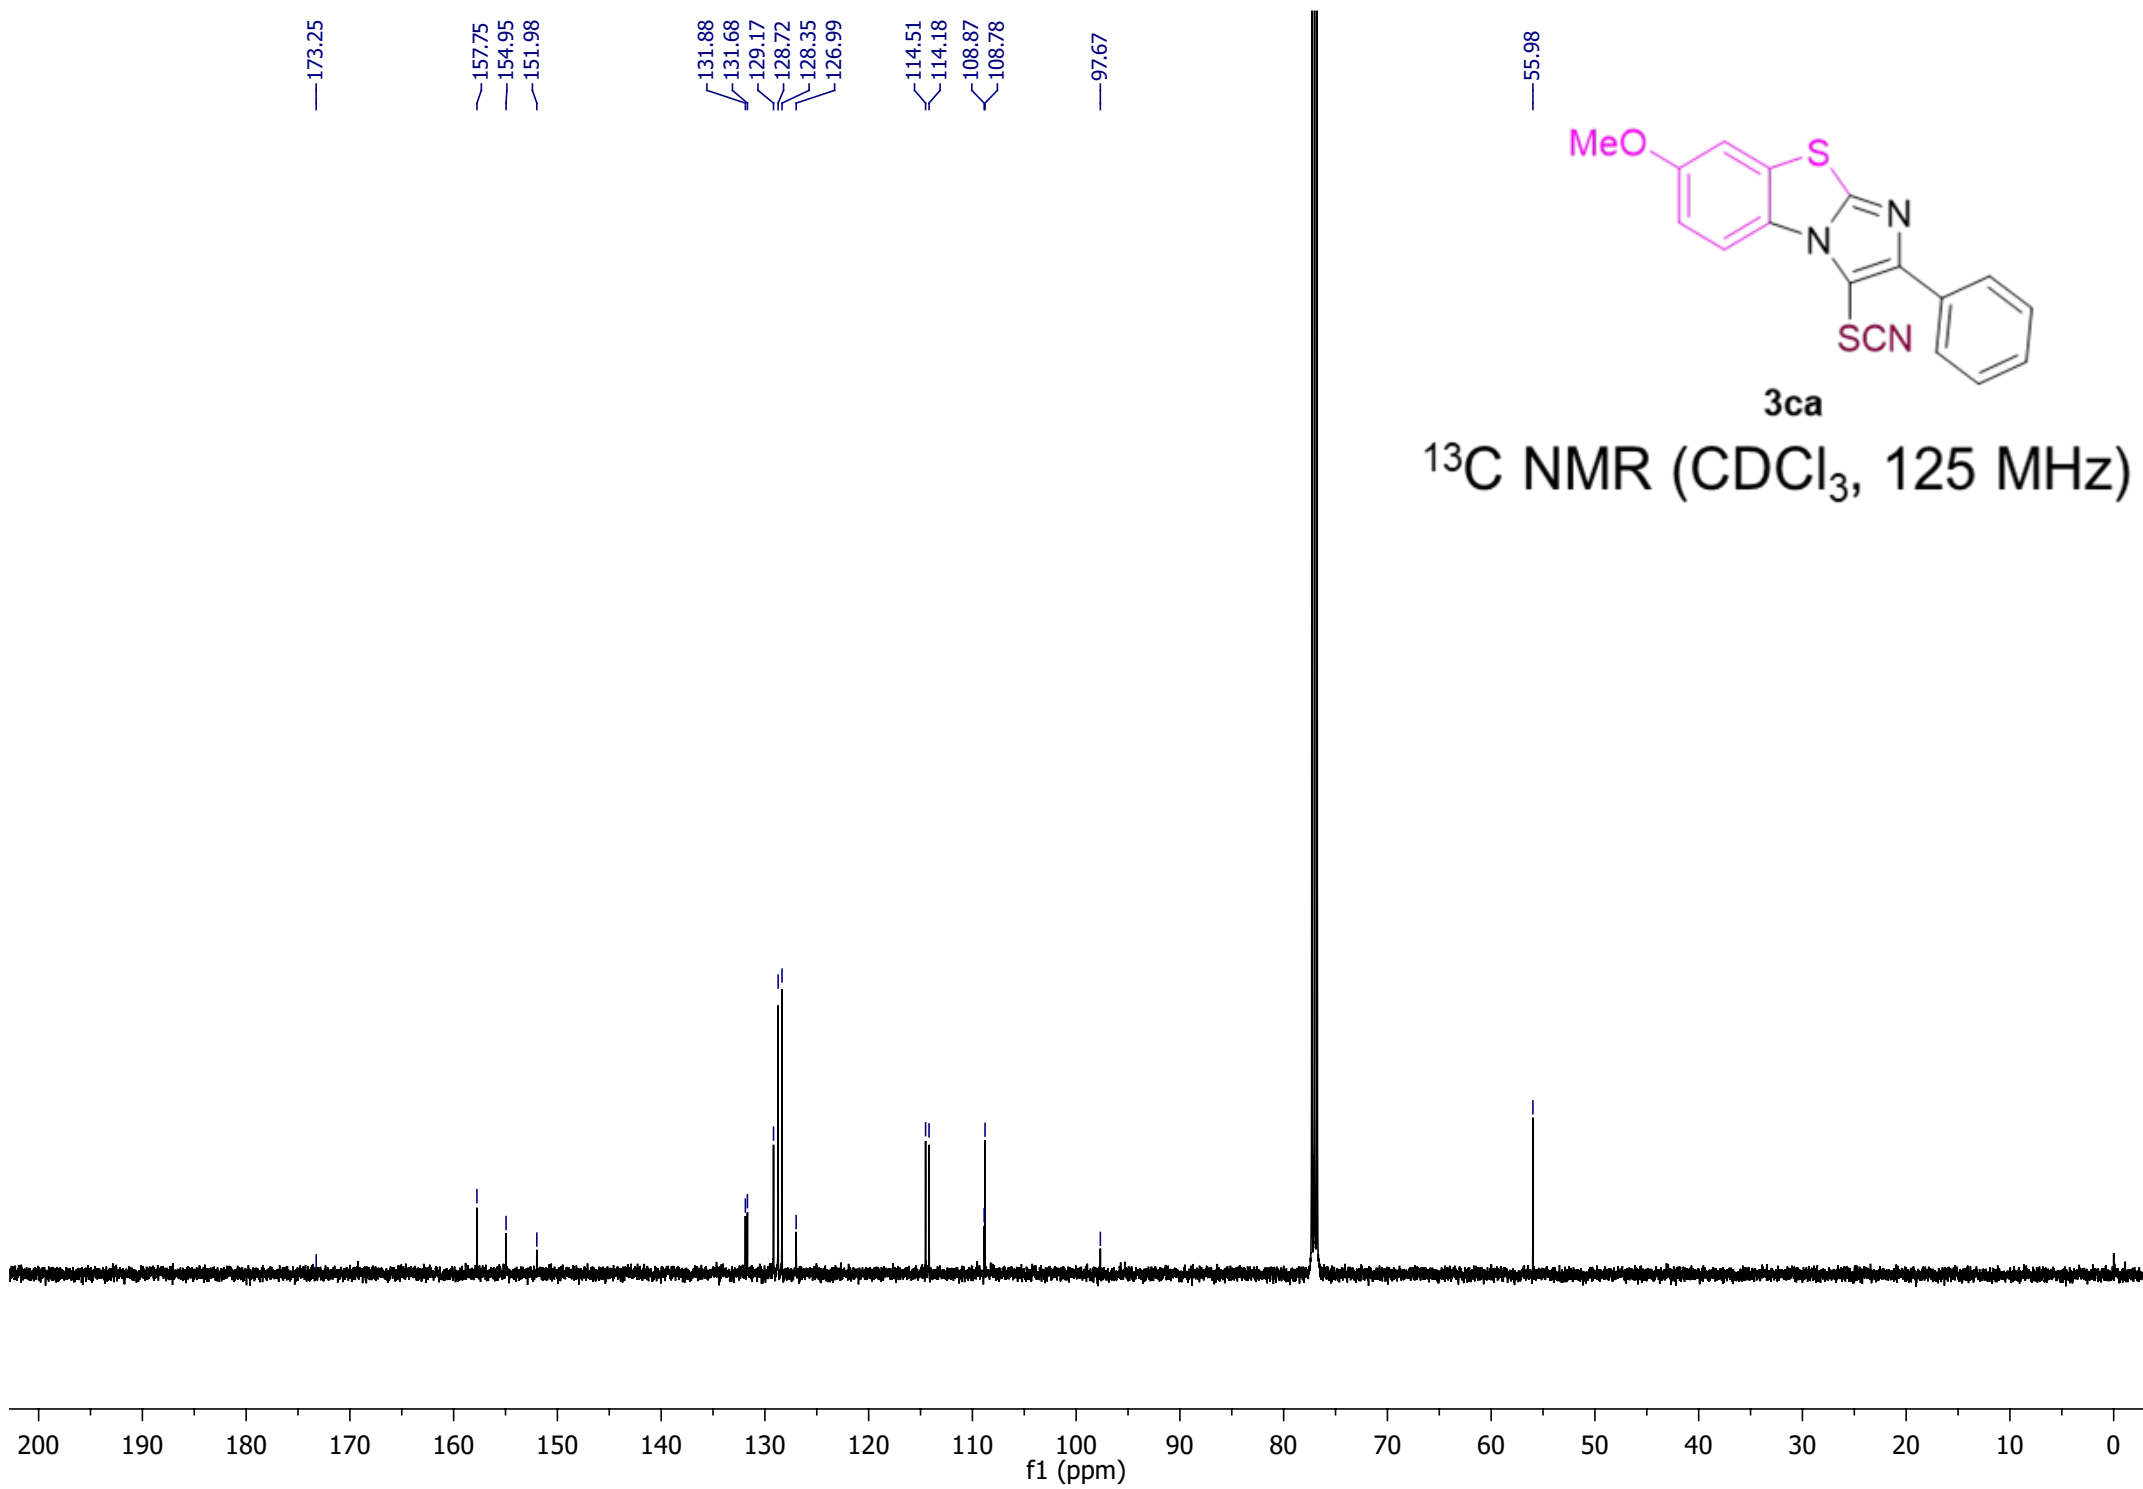

8.065  
8.054  
7.707  
7.698  
7.693  
7.684  
7.156  
7.141  
7.127  
6.602  
6.592  
6.587  
6.577  
6.521  
6.510  
6.499

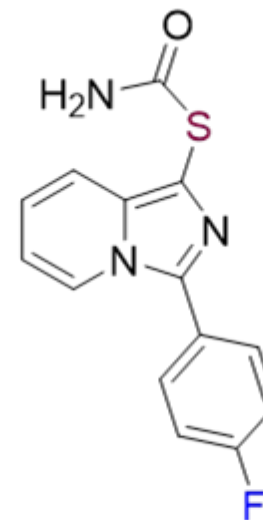

2ea

$^1\text{H}$  NMR ( $\text{CDCl}_3$ , 600 MHz)

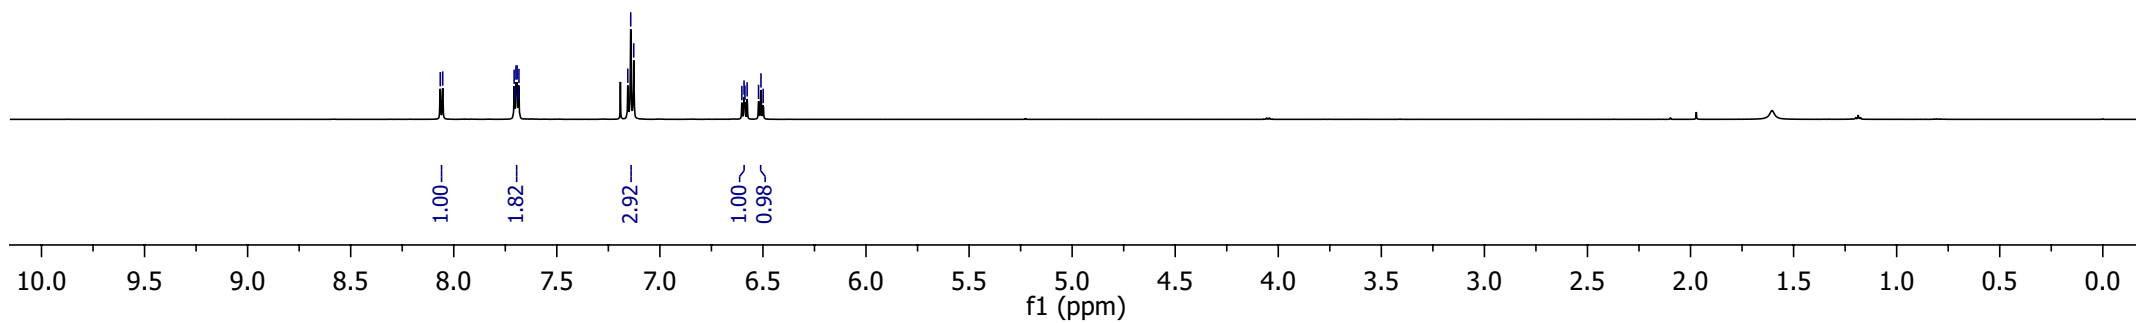

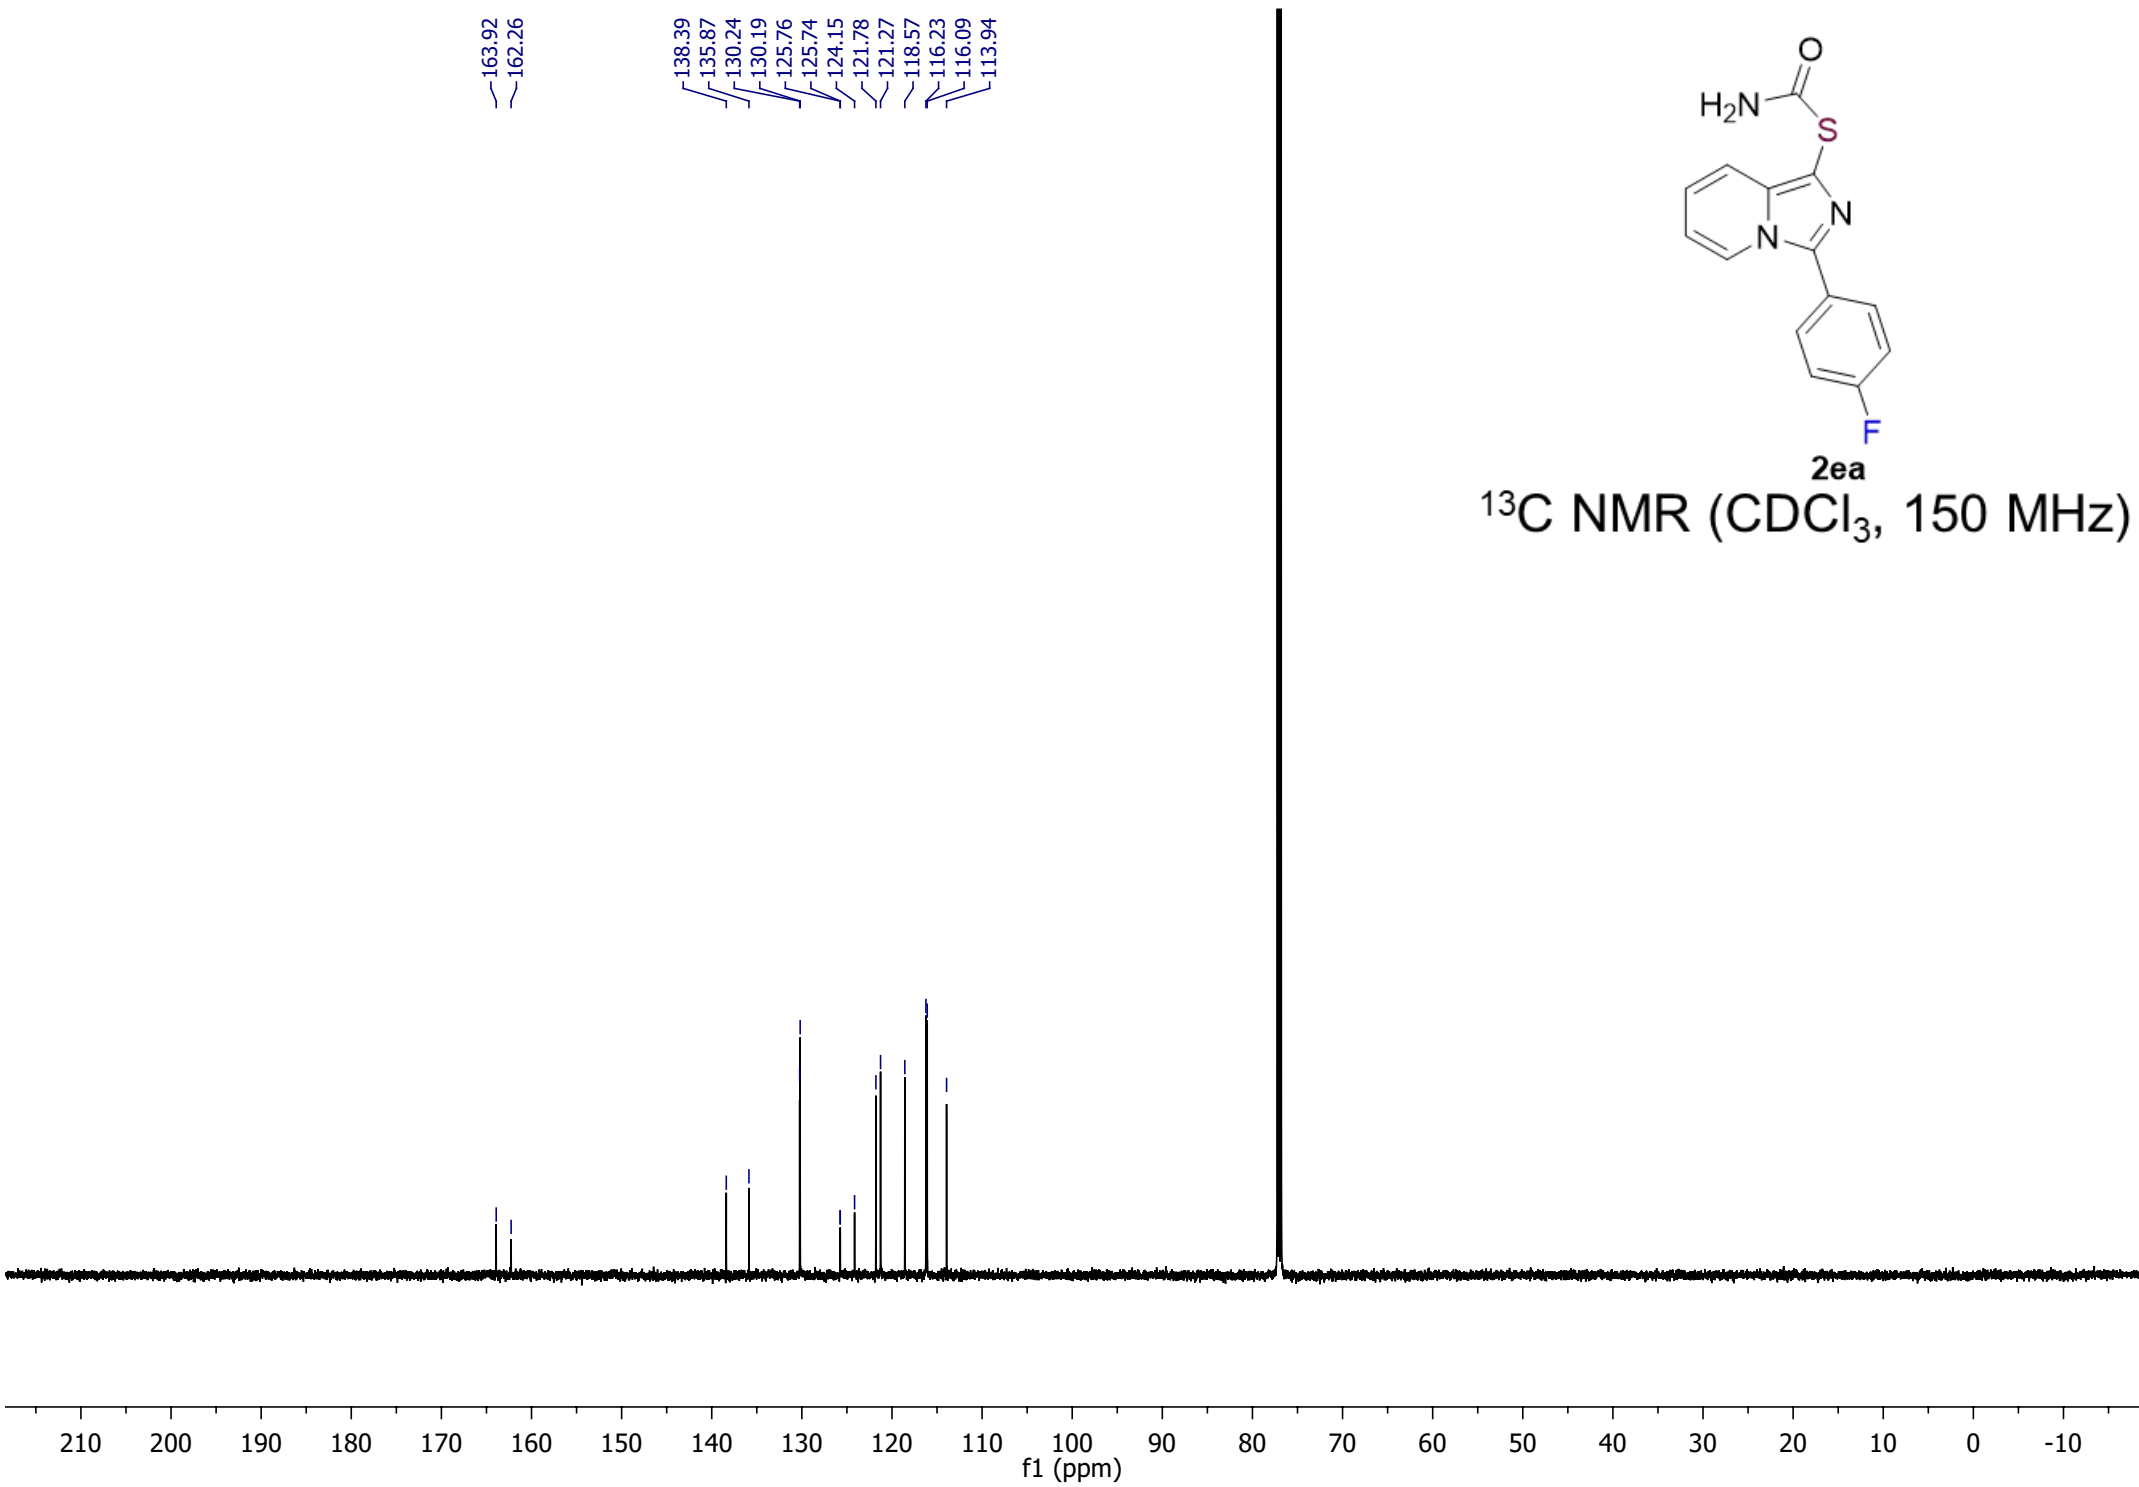

-107.841  
-107.852  
-107.859  
-107.864  
-107.870  
-107.877  
-107.881  
-107.888  
-107.893  
-107.899

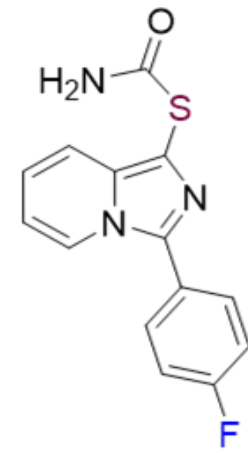

2ea

<sup>19</sup>F NMR (CDCl<sub>3</sub>, 471 MHz)

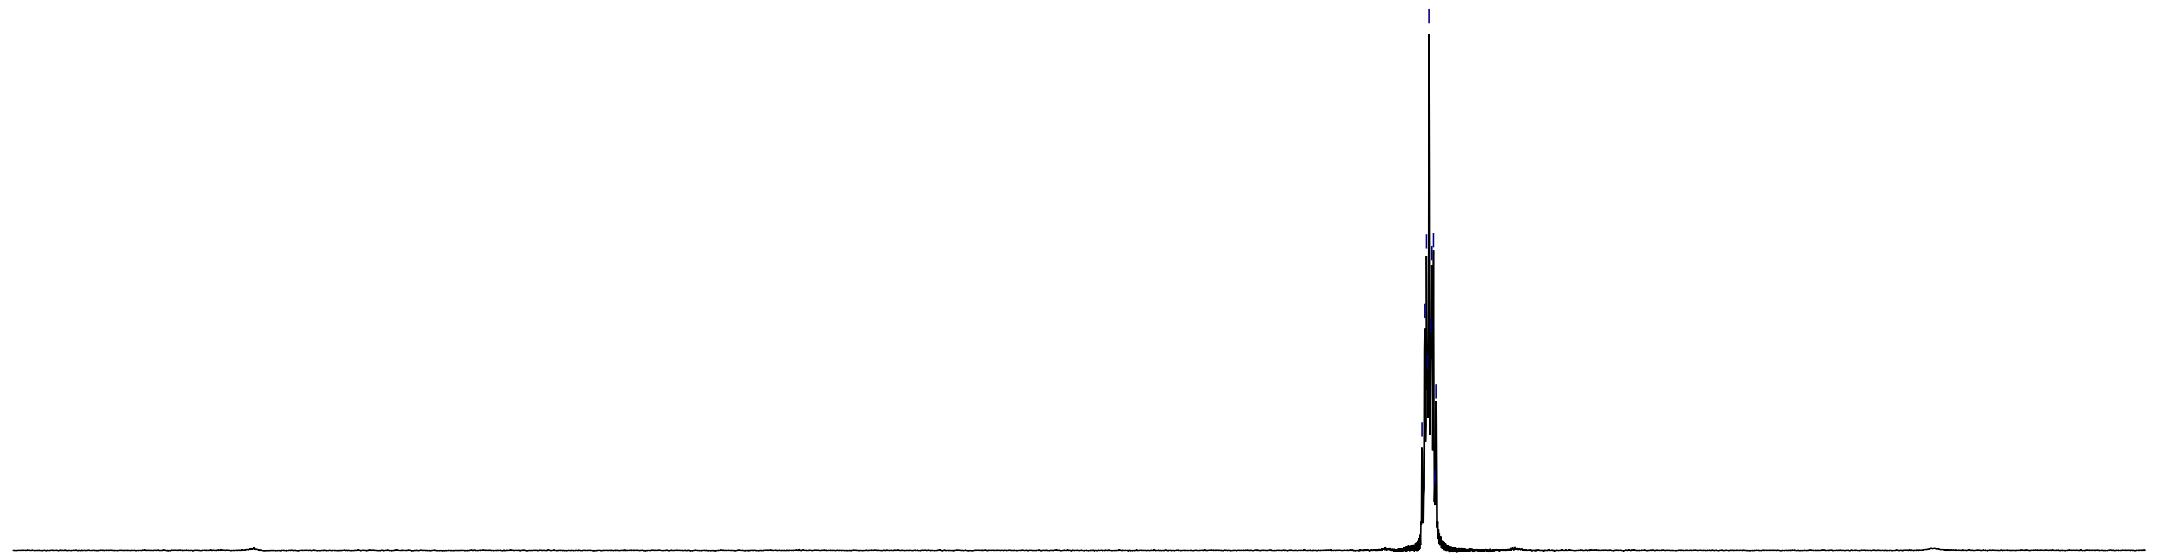

-102.5 -103.0 -103.5 -104.0 -104.5 -105.0 -105.5 -106.0 -106.5 -107.0 -107.5 -108.0 -108.5 -109.0 -109.5 -110.0 -110.5  
f1 (ppm)

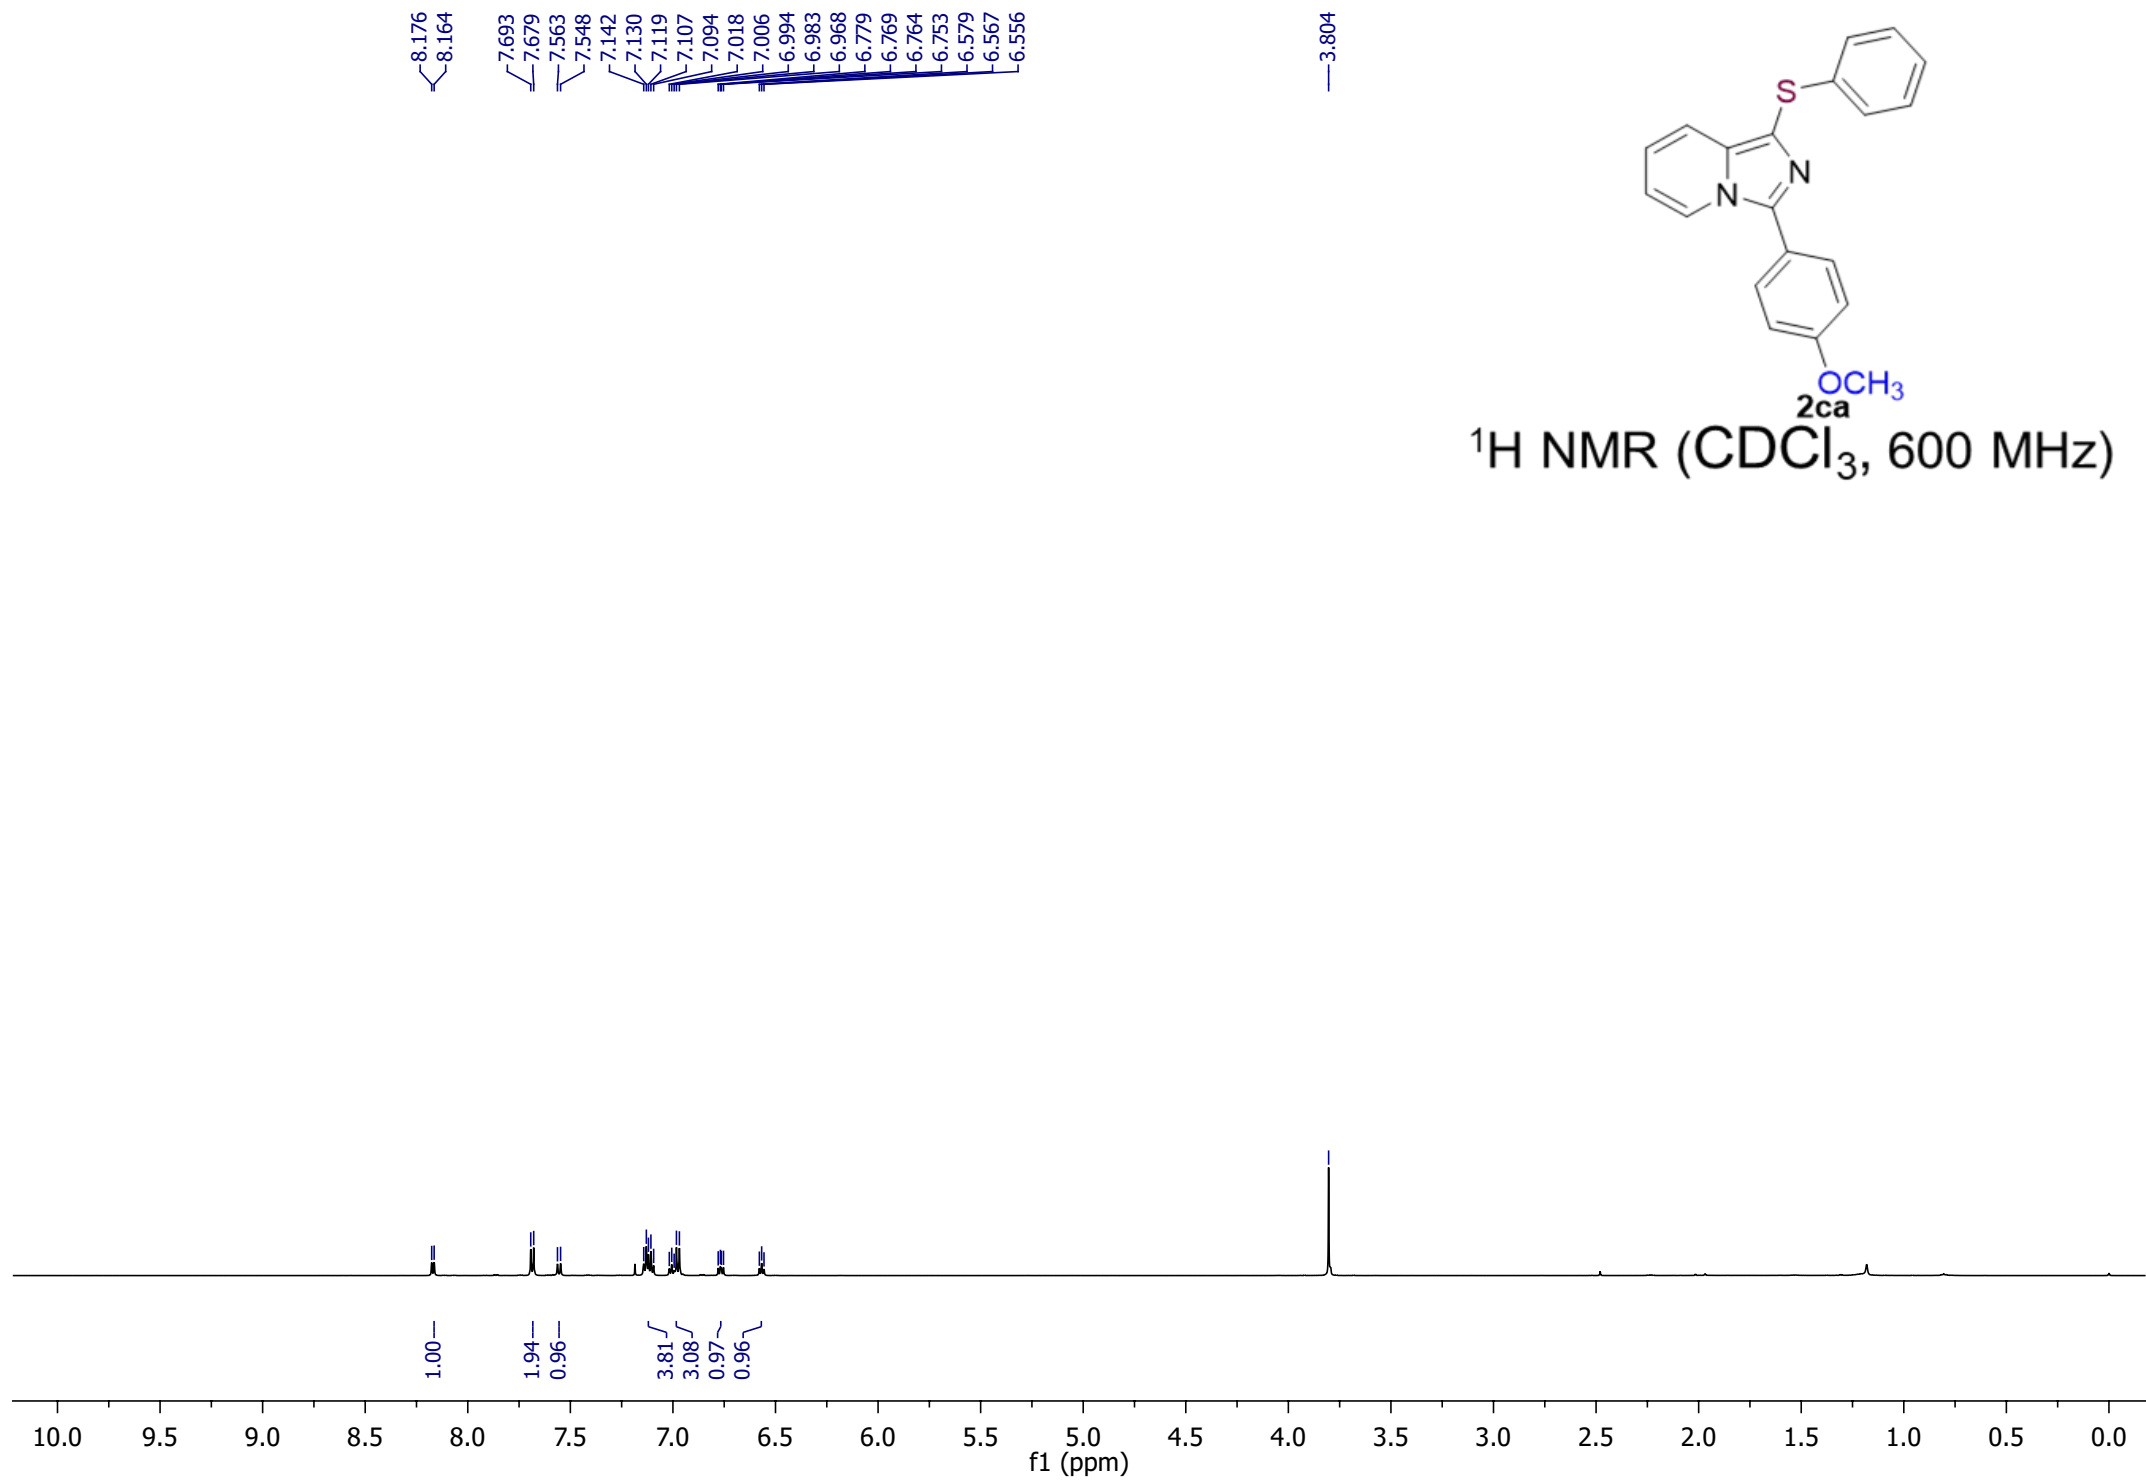

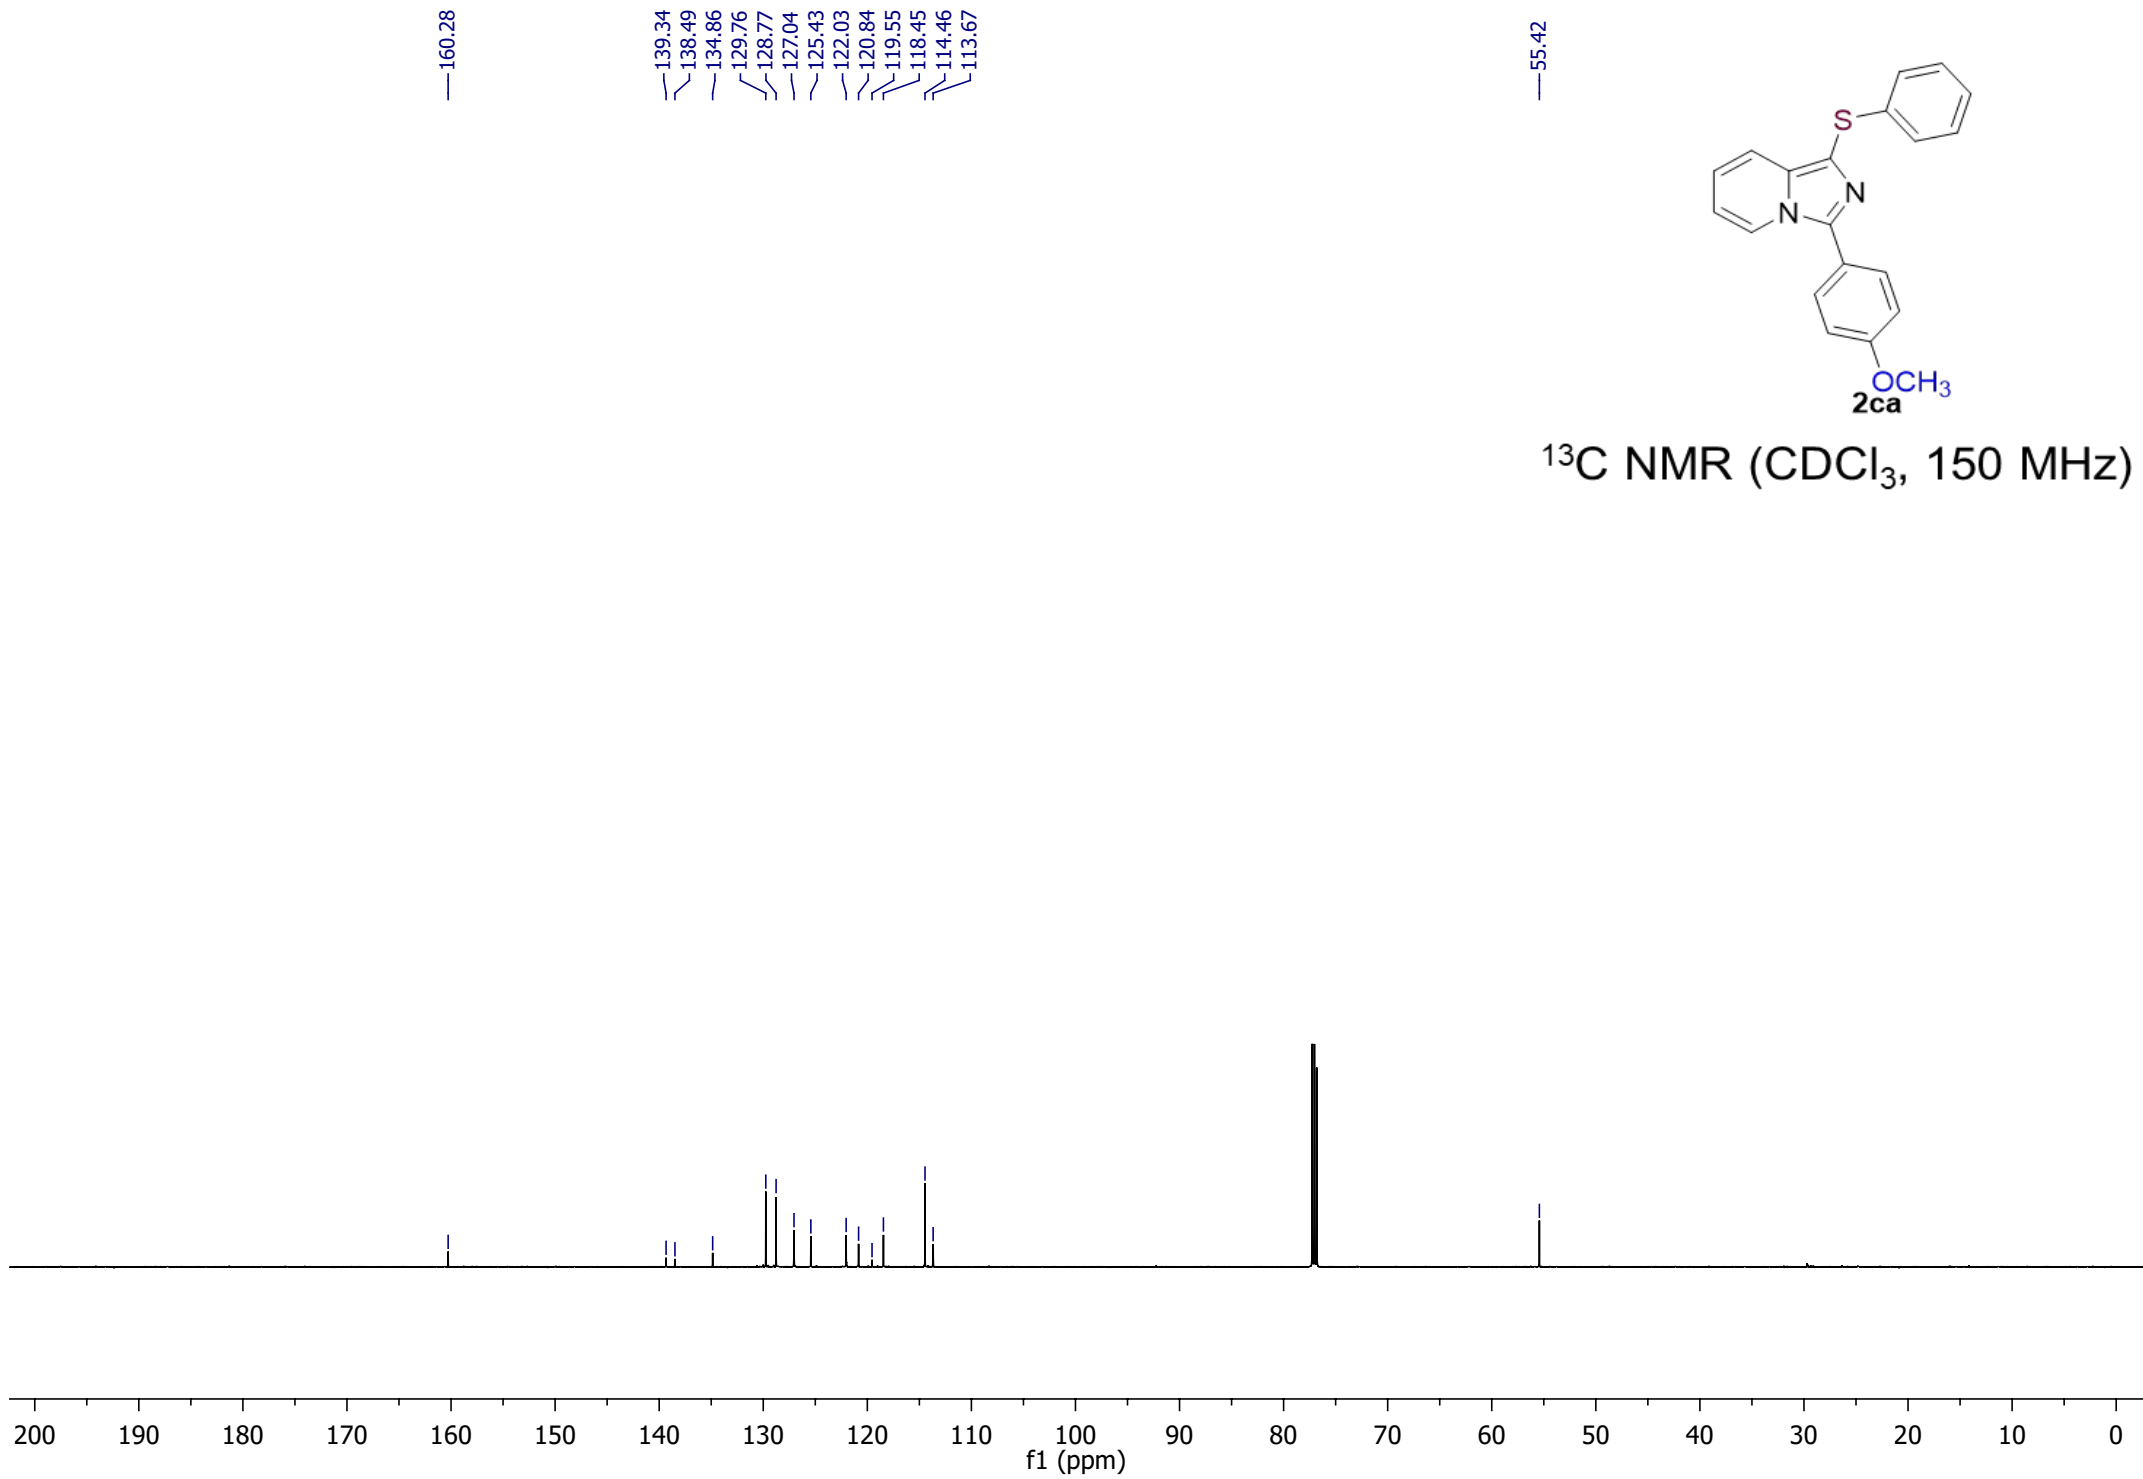

Supplement: d4nj00327f1.pdf [file d4nj00327f1.pdf]
